# Supplementary material for: Detecting, mapping, and suppressing the spread of a decade-long Pseudomonas aeruginosa nosocomial outbreak with genomics
Source: bioRxiv preprint, doi:10.1101/2023.07.24.550326, version 3 (2025-06-30)
Supplement: Supplemental Table 2 [file 550326_file10.xlsx]

## Sheet: New_ST621_SNP_Matrix
Isolate ID	10240	10241	10242	11335	11376	11488	11536	11537	11934	11978	11980	12426	12427	12428	14550	14596	14597	14598	15681	15738	15740	16340	16343	16382	16386	16388	16389	16390	16391	16395	17460	17848	17956	18712	18802	18806	18852	18853	18854	18856	19712	19760	19762	20554	20555	20737	21228	21279	22475
10240	0	1	0	0	0	0	1	0	0	4	4	20	18	1	3	26	26	26	36	14	40	19	19	25	26	25	26	27	27	28	26	24	34	35	34	35	28	39	39	40	40	23	25	41	40	40	46	39	23
10241	1	0	1	1	1	1	1	1	1	5	7	21	19	2	3	27	27	27	37	15	41	20	20	27	27	26	27	28	28	31	27	25	35	36	35	36	28	40	40	41	41	24	26	42	41	40	47	40	24
10242	0	1	0	0	0	0	1	0	0	4	4	20	18	1	3	26	26	26	36	14	40	19	19	25	26	25	26	27	27	28	26	24	34	35	34	35	28	39	39	40	40	23	25	41	40	40	46	39	23
11335	0	1	0	0	0	0	0	0	0	4	4	20	18	1	2	26	26	26	36	14	40	19	19	25	26	25	26	27	27	27	26	24	34	35	34	35	27	39	39	40	40	23	25	41	40	39	46	39	23
11376	0	1	0	0	0	1	0	0	0	4	6	20	18	1	2	26	26	26	36	14	40	19	19	25	26	25	26	27	27	31	26	24	35	35	34	36	27	39	39	40	40	23	25	42	40	39	46	39	24
11488	0	1	0	0	1	0	0	0	0	4	6	20	18	1	2	26	26	26	36	14	40	19	19	26	26	25	26	27	27	30	26	24	34	35	34	35	27	39	39	40	40	23	25	41	40	39	46	39	23
11536	1	1	1	0	0	0	0	1	0	3	4	19	17	1	2	26	25	25	35	13	40	18	18	24	26	24	25	26	27	26	25	23	34	34	33	34	26	38	38	39	40	23	25	40	39	38	46	38	22
11537	0	1	0	0	0	0	1	0	0	4	5	20	18	1	3	26	26	26	36	14	40	19	19	25	26	24	25	26	26	28	26	24	34	35	34	35	28	39	39	40	40	23	24	41	40	40	46	39	23
11934	0	1	0	0	0	0	0	0	0	4	4	20	18	1	2	26	26	26	36	14	40	19	19	25	26	25	26	27	27	27	26	24	34	35	34	35	27	39	39	40	40	23	25	41	40	39	46	39	23
11978	4	5	4	4	4	4	3	4	4	0	0	22	20	5	6	28	28	28	38	16	42	21	21	27	28	27	28	29	29	28	28	26	36	37	36	37	29	41	41	42	42	25	27	43	42	41	48	41	25
11980	4	7	4	4	6	6	4	5	4	0	0	23	20	5	8	28	28	30	38	16	43	21	22	29	28	28	29	30	29	31	29	26	36	37	37	38	29	42	42	43	42	25	28	43	42	42	49	41	25
12426	20	21	20	20	20	20	19	20	20	22	23	0	2	21	22	35	35	35	44	12	48	3	3	23	24	23	24	25	25	26	24	33	42	43	42	43	36	47	47	48	48	17	23	49	48	47	55	47	17
12427	18	19	18	18	18	18	17	18	18	20	20	2	0	19	20	33	33	33	42	10	46	1	1	21	22	21	22	23	23	24	22	31	40	41	40	41	34	45	45	46	46	15	21	47	46	45	53	45	15
12428	1	2	1	1	1	1	1	1	1	5	5	21	19	0	1	27	27	27	37	15	41	20	20	26	27	26	27	28	28	27	27	25	35	36	35	36	28	40	40	41	41	24	26	42	41	40	47	40	24
14550	3	3	3	2	2	2	2	3	2	6	8	22	20	1	0	29	28	28	38	16	43	21	21	27	29	27	28	29	30	32	28	26	37	37	36	37	29	41	41	42	43	26	28	43	42	41	49	41	25
14596	26	27	26	26	26	26	26	26	26	28	28	35	33	27	29	0	0	0	36	29	38	34	34	40	41	40	41	42	42	42	41	25	33	34	33	34	4	38	39	39	38	38	40	39	39	38	46	37	38
14597	26	27	26	26	26	26	25	26	26	28	28	35	33	27	28	0	0	0	36	29	38	34	34	40	41	40	41	42	42	41	41	25	33	34	33	34	3	38	39	39	38	38	40	39	39	37	46	37	38
14598	26	27	26	26	26	26	25	26	26	28	30	35	33	27	28	0	0	0	35	29	37	34	34	40	40	40	41	42	42	43	40	24	32	33	32	33	3	37	38	38	36	38	40	37	37	35	43	35	38
15681	36	37	36	36	36	36	35	36	36	38	38	44	42	37	38	36	36	35	0	38	5	43	43	49	50	49	50	51	51	51	50	21	9	10	9	10	37	4	5	5	35	47	49	36	36	34	43	34	47
15738	14	15	14	14	14	14	13	14	14	16	16	12	10	15	16	29	29	29	38	0	42	11	11	17	18	17	18	19	19	19	18	27	36	37	36	37	30	41	41	42	42	15	17	43	42	41	49	41	15
15740	40	41	40	40	40	40	40	40	40	42	43	48	46	41	43	38	38	37	5	42	0	47	47	53	53	53	54	55	55	56	53	24	12	13	12	13	40	7	8	8	38	51	53	39	39	38	46	37	51
16340	19	20	19	19	19	19	18	19	19	21	21	3	1	20	21	34	34	34	43	11	47	0	0	22	23	22	23	24	24	24	23	32	41	42	41	42	35	46	46	47	47	16	22	48	47	46	54	46	16
16343	19	20	19	19	19	19	18	19	19	21	22	3	1	20	21	34	34	34	43	11	47	0	0	22	23	22	23	24	24	28	23	32	41	42	41	42	35	46	46	47	47	16	22	48	47	46	54	46	16
16382	25	27	25	25	25	26	24	25	25	27	29	23	21	26	27	40	40	40	49	17	53	22	22	0	29	18	19	20	20	21	29	38	48	48	47	49	41	52	52	53	53	26	18	55	53	52	60	52	27
16386	26	27	26	26	26	26	26	26	26	28	28	24	22	27	29	41	41	40	50	18	53	23	23	29	0	29	30	31	31	33	0	39	48	49	48	49	43	53	53	54	54	27	29	55	54	54	61	53	27
16388	25	26	25	25	25	25	24	24	25	27	28	23	21	26	27	40	40	40	49	17	53	22	22	18	29	0	1	2	2	4	29	38	47	48	47	48	41	52	52	53	53	26	0	54	53	52	59	52	26
16389	26	27	26	26	26	26	25	25	26	28	29	24	22	27	28	41	41	41	50	18	54	23	23	19	30	1	0	3	3	2	30	39	48	49	48	49	42	53	53	54	54	27	1	55	54	53	60	53	27
16390	27	28	27	27	27	27	26	26	27	29	30	25	23	28	29	42	42	42	51	19	55	24	24	20	31	2	3	0	0	4	31	40	49	50	49	50	43	54	54	55	55	28	2	56	55	54	61	54	28
16391	27	28	27	27	27	27	27	26	27	29	29	25	23	28	30	42	42	42	51	19	55	24	24	20	31	2	3	0	0	4	31	40	49	50	49	50	44	54	54	55	55	28	2	56	55	55	61	54	28
16395	28	31	28	27	31	30	26	28	27	28	31	26	24	27	32	42	41	43	51	19	56	24	28	21	33	4	2	4	4	0	33	39	52	50	50	53	45	55	55	56	56	28	4	57	54	55	63	57	30
17460	26	27	26	26	26	26	25	26	26	28	29	24	22	27	28	41	41	40	50	18	53	23	23	29	0	29	30	31	31	33	0	39	48	49	48	49	42	53	53	54	54	27	29	55	54	53	61	53	27
17848	24	25	24	24	24	24	23	24	24	26	26	33	31	25	26	25	25	24	21	27	24	32	32	38	39	38	39	40	40	39	39	0	18	19	18	19	26	23	24	24	20	35	38	21	21	19	30	19	35
17956	34	35	34	34	35	34	34	34	34	36	36	42	40	35	37	33	33	32	9	36	12	41	41	48	48	47	48	49	49	52	48	18	0	1	0	1	35	11	12	12	32	45	47	33	33	32	40	31	45
18712	35	36	35	35	35	35	34	35	35	37	37	43	41	36	37	34	34	33	10	37	13	42	42	48	49	48	49	50	50	50	49	19	1	0	1	0	35	12	13	13	33	46	48	34	34	32	41	32	46
18802	34	35	34	34	34	34	33	34	34	36	37	42	40	35	36	33	33	32	9	36	12	41	41	47	48	47	48	49	49	50	48	18	0	1	0	1	34	11	12	12	32	45	47	33	33	31	40	31	45
18806	35	36	35	35	36	35	34	35	35	37	38	43	41	36	37	34	34	33	10	37	13	42	42	49	49	48	49	50	50	53	49	19	1	0	1	0	35	12	13	13	33	46	48	34	34	32	41	32	46
18852	28	28	28	27	27	27	26	28	27	29	29	36	34	28	29	4	3	3	37	30	40	35	35	41	43	41	42	43	44	45	42	26	35	35	34	35	0	39	40	40	40	40	42	40	40	38	48	38	39
18853	39	40	39	39	39	39	38	39	39	41	42	47	45	40	41	38	38	37	4	41	7	46	46	52	53	52	53	54	54	55	53	23	11	12	11	12	39	0	7	7	37	50	52	38	38	36	45	36	50
18854	39	40	39	39	39	39	38	39	39	41	42	47	45	40	41	39	39	38	5	41	8	46	46	52	53	52	53	54	54	55	53	24	12	13	12	13	40	7	0	0	38	50	52	39	39	37	46	37	50
18856	40	41	40	40	40	40	39	40	40	42	43	48	46	41	42	39	39	38	5	42	8	47	47	53	54	53	54	55	55	56	54	24	12	13	12	13	40	7	0	0	38	51	53	39	39	37	46	37	51
19712	40	41	40	40	40	40	40	40	40	42	42	48	46	41	43	38	38	36	35	42	38	47	47	53	54	53	54	55	55	56	54	20	32	33	32	33	40	37	38	38	0	51	53	3	3	2	42	1	51
19760	23	24	23	23	23	23	23	23	23	25	25	17	15	24	26	38	38	38	47	15	51	16	16	26	27	26	27	28	28	28	27	35	45	46	45	46	40	50	50	51	51	0	26	52	51	51	57	50	4
19762	25	26	25	25	25	25	25	24	25	27	28	23	21	26	28	40	40	40	49	17	53	22	22	18	29	0	1	2	2	4	29	38	47	48	47	48	42	52	52	53	53	26	0	54	53	53	59	52	26
20554	41	42	41	41	42	41	40	41	41	43	43	49	47	42	43	39	39	37	36	43	39	48	48	55	55	54	55	56	56	57	55	21	33	34	33	34	40	38	39	39	3	52	54	0	4	2	43	2	52
20555	40	41	40	40	40	40	39	40	40	42	42	48	46	41	42	39	39	37	36	42	39	47	47	53	54	53	54	55	55	54	54	21	33	34	33	34	40	38	39	39	3	51	53	4	0	2	43	2	51
20737	40	40	40	39	39	39	38	40	39	41	42	47	45	40	41	38	37	35	34	41	38	46	46	52	54	52	53	54	55	55	53	19	32	32	31	32	38	36	37	37	2	51	53	2	2	0	42	0	50
21228	46	47	46	46	46	46	46	46	46	48	49	55	53	47	49	46	46	43	43	49	46	54	54	60	61	59	60	61	61	63	61	30	40	41	40	41	48	45	46	46	42	57	59	43	43	42	0	41	57
21279	39	40	39	39	39	39	38	39	39	41	41	47	45	40	41	37	37	35	34	41	37	46	46	52	53	52	53	54	54	57	53	19	31	32	31	32	38	36	37	37	1	50	52	2	2	0	41	0	50
22475	23	24	23	23	24	23	22	23	23	25	25	17	15	24	25	38	38	38	47	15	51	16	16	27	27	26	27	28	28	30	27	35	45	46	45	46	39	50	50	51	51	4	26	52	51	50	57	50	0
22477	24	25	24	24	25	24	23	24	24	26	27	28	26	25	26	38	38	37	48	22	52	27	27	34	34	33	34	35	35	40	34	36	46	47	46	47	39	51	51	52	52	31	33	53	52	51	58	51	31
22479	27	28	27	27	28	27	27	27	27	29	30	31	29	28	30	41	41	39	51	25	55	30	30	37	37	36	37	38	38	40	37	39	49	50	49	50	43	54	54	55	55	34	36	56	55	55	61	54	34
22480	38	39	38	38	39	38	37	38	38	40	41	46	44	39	40	37	37	35	34	40	37	45	45	52	52	51	52	53	53	56	52	19	31	32	31	32	38	36	37	37	1	49	51	2	2	0	41	0	49
22524	23	24	23	23	23	23	23	23	23	25	25	17	15	24	26	38	38	38	47	15	51	16	16	26	27	26	27	28	28	29	27	35	45	46	45	46	40	50	50	51	51	4	26	52	51	51	57	50	0
22525	5	6	5	5	6	5	5	5	5	1	1	23	21	6	8	29	29	29	39	17	43	22	22	29	29	28	29	30	30	33	29	27	37	38	37	38	31	42	42	43	43	26	28	44	43	43	49	42	26
22526	27	29	27	27	28	29	27	28	27	29	30	32	29	28	29	41	41	41	51	25	56	30	31	37	37	37	38	39	38	38	38	39	50	50	50	51	42	55	55	56	55	34	37	57	55	55	62	54	35
22527	27	28	27	27	29	28	28	28	27	29	29	32	29	28	30	41	41	41	51	25	56	30	31	38	37	37	38	39	38	41	38	39	49	50	50	50	43	55	55	56	55	34	37	56	55	56	62	54	34
22528	27	28	27	27	28	27	26	27	27	29	30	31	29	28	29	41	41	40	51	25	55	30	30	37	37	36	37	38	38	42	37	39	49	50	49	50	42	54	54	55	55	34	36	56	55	54	61	54	34
22529	23	24	23	23	24	23	22	23	23	25	25	17	15	24	25	38	38	38	47	15	51	16	16	27	27	26	27	28	28	30	27	35	45	46	45	46	39	50	50	51	51	4	26	52	51	50	57	50	0
23194	23	26	23	22	26	25	21	24	22	23	26	19	17	22	27	35	34	36	46	14	51	17	21	26	28	27	27	27	27	25	28	33	47	45	45	48	38	50	50	51	51	21	27	52	49	50	58	52	23
23253	20	21	20	20	21	20	19	20	20	22	23	16	14	21	22	33	33	33	44	12	48	15	15	24	24	23	24	25	25	27	24	32	42	43	42	43	34	47	47	48	48	19	23	49	48	47	54	47	19
23254	32	33	32	32	32	32	31	32	32	34	34	41	39	33	34	34	34	32	30	35	32	40	40	46	47	46	47	48	48	48	47	17	27	28	27	28	35	32	33	33	29	43	46	30	30	28	15	28	43
23255	33	34	33	33	34	33	33	33	33	35	35	42	40	34	36	35	35	33	31	36	33	41	41	48	48	47	48	49	49	52	48	18	28	29	28	29	37	33	34	34	30	44	47	31	31	30	16	29	44
23256	23	24	23	23	24	23	22	23	23	25	25	17	15	24	25	38	38	38	47	15	51	16	16	27	27	26	27	28	28	30	27	35	45	46	45	46	39	50	50	51	51	4	26	52	51	50	57	50	0
23296	20	21	20	20	21	20	20	20	20	22	22	16	14	21	23	33	33	33	44	12	48	15	15	24	24	23	24	25	25	29	24	32	42	43	42	43	35	47	47	48	48	19	23	49	48	48	54	47	19
23298	25	26	25	25	26	25	25	25	25	27	27	29	27	26	28	39	39	38	49	23	53	28	28	35	35	34	35	36	36	41	35	37	47	48	47	48	41	52	52	53	53	32	34	54	53	53	59	52	32
23299	25	26	25	25	26	26	26	26	25	27	27	30	27	26	28	39	39	39	49	23	54	28	29	35	35	35	36	37	36	36	36	37	47	48	48	48	41	53	53	54	53	32	35	54	53	54	60	52	32
23300	25	26	25	25	26	25	25	25	25	27	27	29	27	26	28	39	39	38	49	23	53	28	28	35	35	34	35	36	36	41	35	37	47	48	47	48	41	52	52	53	53	32	34	54	53	53	59	52	32
24485	48	49	48	48	49	48	48	48	48	50	51	57	55	49	51	48	48	45	45	51	48	56	56	63	63	62	63	64	64	68	63	32	42	43	42	43	50	47	48	48	44	59	62	45	45	44	1	43	59
24489	7	8	7	7	8	8	7	8	6	2	4	26	22	7	10	30	30	31	38	19	43	23	25	31	30	30	32	32	31	33	31	26	37	38	38	38	33	43	43	44	43	27	31	44	42	44	50	42	29
24533	8	10	8	8	8	9	7	8	8	4	6	26	24	9	10	32	32	32	40	20	44	25	25	31	32	31	32	33	33	35	32	28	39	39	38	40	33	43	43	44	44	29	31	46	44	43	50	43	30
25675	52	52	52	52	52	51	51	52	51	53	53	61	58	52	55	51	51	48	48	55	51	59	60	66	66	65	67	67	67	68	66	35	45	47	46	46	54	51	52	52	48	62	66	48	48	48	5	47	63
25717	52	53	52	52	53	52	51	52	52	54	54	61	59	53	54	52	52	49	49	55	52	60	60	67	67	66	67	68	68	70	67	36	46	47	46	47	53	51	52	52	48	63	66	49	49	47	4	47	63
25718	56	56	56	56	57	56	55	57	55	57	57	66	62	56	58	55	55	53	52	59	56	63	65	71	70	70	72	72	71	72	71	39	49	51	51	50	57	56	57	57	52	66	71	52	52	52	10	51	67
26915	38	39	38	38	38	38	37	38	38	40	41	44	42	39	40	38	38	37	4	38	7	43	43	49	50	49	50	51	51	51	50	23	11	12	11	12	39	6	7	7	37	47	49	38	38	36	45	36	47
26917	34	34	34	33	34	34	33	35	33	35	35	43	40	34	35	35	34	33	31	36	35	41	42	48	49	48	49	50	50	49	49	18	29	29	29	29	35	34	35	35	31	45	49	31	31	30	18	29	44
26959	34	35	34	34	34	34	33	34	34	36	36	43	41	35	36	35	35	33	31	37	33	42	42	48	49	48	49	50	50	50	49	18	28	29	28	29	36	33	34	34	30	45	48	31	31	29	16	29	45
26960	41	43	41	42	42	42	41	41	42	44	44	48	45	42	45	42	42	41	8	42	11	46	46	53	54	53	54	54	54	56	53	26	15	15	14	16	43	10	11	11	41	50	52	41	42	41	48	40	50
26962	44	45	44	44	44	44	43	44	44	46	47	52	50	45	46	44	44	43	10	46	13	51	51	57	58	57	58	59	59	60	58	28	17	18	17	18	45	12	5	5	43	55	57	44	44	42	50	42	55
26964	40	41	40	40	40	40	39	40	40	42	43	48	46	41	42	40	40	39	7	42	10	47	47	53	54	53	54	55	55	56	54	25	14	15	14	15	41	9	2	2	40	51	53	41	41	39	47	39	51
26965	33	34	33	33	33	33	32	33	33	35	36	42	40	34	35	34	34	32	31	36	33	41	41	47	48	47	48	49	49	51	48	18	28	29	28	29	35	33	34	34	30	44	47	31	31	29	16	29	44
26966	33	34	33	33	33	33	32	33	33	35	35	42	40	34	35	35	35	33	31	36	33	41	41	47	48	47	48	49	49	48	48	18	28	29	28	29	36	33	34	34	30	44	47	31	31	29	17	29	44
27002	34	35	34	34	34	34	33	34	34	36	37	43	41	35	36	35	35	33	32	37	34	42	42	48	49	48	49	50	50	51	49	19	29	30	29	30	36	34	35	35	31	45	48	32	32	30	17	30	45
27003	52	53	52	52	52	52	52	52	52	54	55	61	59	53	55	53	53	50	49	55	52	60	60	66	67	66	67	68	68	69	67	36	46	47	46	47	55	51	52	52	48	63	66	49	49	48	4	47	63
27008	56	57	56	56	56	56	55	56	56	58	59	65	63	57	58	55	55	52	52	59	55	64	64	70	71	70	71	72	72	72	71	39	49	50	49	50	56	54	55	55	51	67	70	52	52	50	8	50	67
27009	21	22	21	21	21	21	20	21	21	23	24	29	27	22	23	24	24	24	33	23	36	28	28	34	35	34	35	36	36	39	35	22	30	31	30	31	25	35	36	36	36	32	34	37	37	35	44	35	32
27010	35	36	35	35	35	35	35	35	35	37	38	43	41	36	38	36	36	35	32	37	34	42	42	48	49	48	49	50	50	51	49	18	29	30	29	30	38	34	35	35	20	46	48	21	21	20	40	19	46
27544	34	35	34	34	35	34	33	34	34	36	39	43	41	35	36	35	35	33	31	37	33	42	42	49	49	48	49	50	50	57	49	18	28	29	28	29	36	33	34	34	30	45	48	31	31	29	16	29	45
27549	35	36	35	35	35	35	34	35	35	37	37	44	42	36	37	35	35	33	32	38	34	43	43	49	50	49	50	51	51	50	50	19	29	30	29	30	36	34	35	35	31	46	49	32	32	30	17	30	46
28615	43	44	43	42	44	43	42	44	42	44	47	51	48	43	44	43	42	42	10	44	15	49	50	57	57	56	57	58	58	63	57	28	18	18	18	18	43	13	6	6	44	54	57	44	44	43	52	42	53
28617	56	57	56	56	56	56	55	56	56	58	58	65	63	57	58	56	56	53	53	59	56	64	64	70	71	70	71	72	72	71	71	40	50	51	50	51	57	55	56	56	52	67	70	53	53	51	11	51	67
28674	40	41	40	40	40	40	39	40	40	42	43	48	46	41	42	40	40	39	8	42	11	47	47	53	54	53	54	55	55	57	54	26	15	16	15	16	41	10	3	3	41	51	53	42	42	40	48	40	51
29287	40	41	40	40	40	40	39	40	40	42	42	48	46	41	42	39	39	37	36	42	39	47	47	53	54	53	54	55	55	54	54	21	33	34	33	34	40	38	39	39	3	51	53	4	4	2	43	2	51
29335	18	19	18	18	18	18	17	18	18	20	20	6	4	19	20	33	33	33	42	10	46	5	5	21	22	21	22	23	23	22	22	31	40	41	40	41	34	45	45	46	46	15	21	47	46	45	53	45	15
30533	41	42	41	41	42	41	40	41	41	43	45	49	47	42	43	40	40	38	37	43	40	48	48	55	55	54	55	56	56	60	55	22	34	35	34	35	41	39	40	40	4	52	54	5	5	3	44	3	52
30583	18	20	18	18	18	19	18	18	18	20	24	6	4	19	21	33	33	33	42	10	46	5	5	21	22	21	22	23	23	31	22	31	41	41	40	42	35	45	45	46	46	15	21	48	46	46	53	45	16
30585	33	34	33	33	34	33	32	33	33	35	37	42	40	34	35	32	32	31	29	36	32	41	41	48	48	47	48	49	49	54	48	15	26	27	26	27	33	31	32	32	28	44	47	29	29	27	36	27	44
30587	25	26	25	25	26	26	25	25	25	27	29	9	7	26	28	39	39	40	49	17	53	8	8	29	29	28	29	30	30	35	29	38	47	48	47	49	41	52	52	53	53	22	28	54	53	53	60	52	22
30629	21	22	21	21	22	21	20	21	21	23	23	5	3	22	23	35	35	35	45	13	49	4	4	25	25	24	25	26	26	31	25	34	43	44	43	44	36	48	48	49	49	18	24	50	49	48	56	48	18
30630	27	28	27	27	27	27	26	27	27	29	29	13	11	28	29	42	42	42	51	19	55	12	12	30	31	30	31	32	32	32	31	38	49	50	49	50	43	54	54	55	55	24	30	56	55	54	60	54	24
30631	29	30	29	29	29	29	29	29	29	31	31	15	13	30	32	44	44	44	53	21	57	14	14	32	33	32	33	34	34	36	33	40	51	52	51	52	46	56	56	57	57	26	32	58	57	57	62	56	26
30632	24	26	24	24	25	24	23	24	24	26	29	8	6	25	26	38	38	38	48	16	52	7	7	28	28	27	28	29	29	33	28	37	46	47	46	47	39	51	51	52	52	21	27	53	52	51	59	51	21
30634	39	40	39	39	39	39	38	39	39	41	41	47	45	40	41	40	40	39	36	41	38	46	46	52	53	52	53	54	54	53	53	22	33	34	33	34	41	38	39	39	24	50	52	25	25	23	44	23	50
30985	31	32	31	31	31	31	30	31	31	33	33	40	38	32	33	32	32	31	28	34	31	39	39	45	46	45	46	47	47	48	46	15	25	26	25	26	33	30	31	31	27	42	45	28	28	26	37	26	42
30986	32	33	32	32	33	32	31	32	32	34	35	41	39	33	34	32	32	31	28	35	31	40	40	47	47	46	47	48	48	51	47	15	25	26	25	26	33	30	31	31	27	43	46	28	28	26	37	26	43
30989	17	18	17	17	18	17	17	17	17	19	21	5	3	18	20	32	32	32	41	9	45	4	4	21	21	20	21	22	22	27	21	30	39	40	39	40	34	44	44	45	45	14	20	46	45	45	52	44	14
33071	46	47	46	45	47	46	44	47	44	46	46	54	50	45	50	45	44	45	12	47	17	51	53	60	59	58	60	60	60	60	59	30	20	21	21	22	46	16	9	9	47	56	60	46	46	46	55	46	56
345709	41	42	41	40	44	41	39	42	39	41	41	49	47	40	45	40	39	40	37	42	40	47	50	55	56	55	55	55	55	56	56	22	35	35	35	36	43	40	41	41	26	51	55	25	25	25	47	27	51
345754	35	36	35	34	36	35	33	36	33	35	35	44	40	34	38	36	35	35	31	37	35	41	43	50	49	48	50	50	50	51	49	18	29	30	30	30	37	35	36	36	32	45	50	31	31	31	19	30	45
345806	34	35	34	33	35	34	32	35	32	34	34	43	39	33	37	34	33	33	30	36	34	40	42	49	48	47	49	49	49	51	48	17	28	29	29	29	35	34	35	35	31	44	49	30	30	30	18	29	44
354187	37	38	37	37	37	37	36	37	37	39	39	23	21	38	39	52	52	52	61	29	65	22	22	40	41	40	41	42	42	41	41	50	59	60	59	60	53	64	64	65	65	34	40	66	65	64	72	64	34
354585	33	34	33	33	33	33	32	33	33	35	36	42	40	34	35	34	34	32	30	36	32	41	41	47	48	47	48	49	49	50	48	17	27	28	27	28	35	32	33	33	29	44	47	30	30	28	15	28	44
354594	33	34	33	33	33	33	32	33	33	35	35	42	40	34	35	33	33	31	30	36	32	41	41	47	48	47	48	49	49	48	48	17	27	28	27	28	34	32	33	33	29	44	47	30	30	28	15	28	44
354600	33	34	33	33	33	33	32	33	33	35	36	42	40	34	35	34	34	32	30	36	32	41	41	47	48	47	48	49	49	50	48	17	27	28	27	28	35	32	33	33	29	44	47	30	30	28	15	28	44
358749	45	46	45	45	45	45	44	45	45	47	47	51	49	46	47	45	45	44	11	45	14	50	50	56	57	56	57	58	58	57	57	30	18	19	18	19	46	13	14	14	44	54	56	45	45	43	52	43	54
358758	32	33	32	32	32	32	31	32	32	34	34	41	39	33	34	33	33	31	30	35	32	40	40	46	47	46	47	48	48	47	47	17	27	28	27	28	34	32	33	33	29	43	46	30	30	28	15	28	43
358767	32	33	32	32	32	32	31	32	32	34	35	41	39	33	34	33	33	31	30	35	32	40	40	46	47	46	47	48	48	48	47	17	27	28	27	28	34	32	33	33	29	43	46	30	30	28	15	28	43
358776	45	46	45	45	45	45	44	45	45	47	48	51	49	46	47	45	45	44	11	45	14	50	50	56	57	56	57	58	58	59	57	30	18	19	18	19	46	13	14	14	44	54	56	45	45	43	52	43	54
358785	32	33	32	32	32	32	31	32	32	34	35	41	39	33	34	34	34	32	30	35	32	40	40	46	47	46	47	48	48	49	47	17	27	28	27	28	35	32	33	33	29	43	46	30	30	28	15	28	43
358794	45	46	45	45	45	45	45	45	45	47	47	51	49	46	48	45	45	44	11	45	14	50	50	56	57	56	57	58	58	59	57	30	18	19	18	19	47	13	14	14	44	54	56	45	45	44	52	43	54
359784	36	37	36	36	36	36	36	36	36	38	42	45	43	37	39	37	37	35	33	39	35	44	44	50	51	50	51	52	52	59	51	20	30	31	30	31	39	35	36	36	32	47	50	33	33	32	18	31	47
359809	33	34	33	33	33	33	33	33	33	35	36	42	40	34	36	34	34	32	30	36	32	41	41	47	48	47	48	49	49	52	48	17	27	28	27	28	36	32	33	33	29	44	47	30	30	29	15	28	44
359845	40	41	40	40	40	40	40	40	40	42	43	48	46	41	43	41	41	40	37	42	39	47	47	53	54	53	54	55	55	59	54	23	34	35	34	35	43	39	40	40	25	51	53	26	26	25	45	24	51
359854	32	33	32	32	32	32	31	32	32	34	34	41	39	33	34	34	34	32	30	35	32	40	40	46	47	46	47	48	48	47	47	17	27	28	27	28	35	32	33	33	29	43	46	30	30	28	15	28	43
375065	32	33	32	32	33	32	31	32	32	34	35	41	39	33	34	35	35	33	30	35	33	40	40	47	47	46	47	48	48	52	47	17	28	29	28	29	36	33	33	34	30	43	46	31	30	29	15	29	43
375135	33	34	33	33	33	33	33	33	33	35	36	42	40	34	36	34	34	32	30	36	32	41	41	47	48	47	48	49	49	51	48	17	27	28	27	28	36	32	33	33	29	44	47	30	30	29	15	28	44
375658	34	35	34	34	34	34	33	34	34	36	37	43	41	35	36	35	35	33	32	37	34	42	42	48	49	48	49	50	50	51	49	19	29	30	29	30	36	34	35	35	31	45	48	32	32	30	19	30	45
391498	37	38	37	37	37	37	36	37	37	39	40	46	44	38	39	38	38	36	34	40	36	45	45	51	52	51	52	53	53	54	52	21	31	32	31	32	39	36	37	37	33	48	51	34	34	32	20	32	48
391504	36	37	36	36	36	36	36	36	36	38	38	45	43	37	39	37	37	35	33	39	35	44	44	50	51	50	51	52	52	52	51	20	30	31	30	31	39	35	36	36	32	47	50	33	33	32	20	31	47
391957	36	38	37	37	37	37	35	36	37	39	40	46	44	38	39	37	37	35	34	40	36	45	45	51	52	51	52	52	53	53	51	20	31	32	30	32	38	36	37	37	33	48	51	34	34	31	18	32	48
393919	43	44	43	43	43	43	42	43	43	45	45	51	49	44	45	44	44	43	40	45	42	50	50	56	57	56	57	58	58	60	57	26	37	38	37	38	45	42	43	43	28	54	56	29	29	27	48	27	54
406514	35	36	35	35	36	35	35	35	35	37	37	44	42	36	38	36	36	34	32	38	34	43	43	50	50	49	50	51	51	55	50	19	29	30	29	30	38	34	35	35	31	46	49	32	32	31	19	30	46
406532	39	40	39	39	39	39	38	39	39	41	42	47	45	40	41	40	40	39	36	41	38	46	46	52	53	52	53	54	54	57	53	22	33	34	33	34	41	38	39	39	24	50	52	25	25	23	44	23	50
406541	35	36	35	35	35	35	34	35	35	37	38	44	42	36	37	36	36	34	32	38	34	43	43	49	50	49	50	51	51	52	50	19	29	30	29	30	37	34	35	35	31	46	49	32	32	30	19	30	46
407045	18	19	18	18	18	18	17	18	18	20	21	24	22	19	20	33	33	33	41	18	44	23	23	29	30	29	30	31	31	32	30	30	39	40	39	40	34	44	44	45	45	27	29	46	45	44	52	44	27
407054	18	19	18	18	18	18	17	18	18	20	21	24	22	19	20	33	33	33	41	18	44	23	23	29	30	29	30	31	31	31	30	30	39	40	39	40	34	44	44	45	45	27	29	46	45	44	52	44	27
415901	39	40	39	39	39	39	39	39	39	41	42	47	45	40	42	38	38	36	35	41	38	46	46	52	53	52	53	54	54	56	53	20	32	33	32	33	40	37	38	38	4	50	52	5	5	4	42	3	50
415947	59	60	59	59	59	59	59	59	59	61	62	68	66	60	62	59	59	58	55	62	58	67	67	73	74	73	74	75	75	78	74	42	52	53	52	53	61	57	58	58	54	70	73	55	55	54	64	53	70
416663	31	33	31	31	33	33	32	32	32	34	35	42	39	33	35	14	14	13	42	35	45	40	41	47	47	47	48	49	48	50	48	29	39	40	40	40	16	45	46	46	44	44	47	45	45	45	52	43	43
416681	32	32	32	32	32	31	31	32	31	33	34	41	38	32	35	13	13	12	41	35	43	39	40	46	46	45	47	47	47	48	46	29	38	40	39	39	16	44	45	45	44	43	46	44	44	44	51	43	44
417398	32	33	32	31	34	33	31	33	32	34	34	42	39	33	34	15	14	13	42	35	46	40	41	48	48	47	48	49	49	49	48	29	40	40	40	40	15	45	46	46	45	45	48	45	45	44	53	43	43
427146	47	48	47	47	48	48	48	48	47	49	49	56	53	48	50	58	58	59	66	49	70	54	55	61	61	61	62	63	62	64	62	54	64	65	65	65	60	70	70	71	70	58	61	71	70	71	77	69	58
427164	19	20	19	19	20	19	19	19	19	21	22	7	5	20	22	34	34	34	43	11	47	6	6	23	23	22	23	24	24	27	23	32	41	42	41	42	36	46	46	47	47	16	22	48	47	47	54	46	16
427173	39	40	39	39	40	40	40	40	39	41	41	48	45	40	42	38	38	37	35	41	39	46	47	53	53	53	54	55	54	54	54	20	32	33	33	33	40	38	39	39	4	50	53	5	5	5	43	3	50
435279	34	35	34	34	34	34	33	34	34	36	36	43	41	35	36	34	34	32	32	37	34	42	42	48	49	48	49	50	50	52	49	19	29	30	29	30	35	34	35	35	31	45	48	32	32	30	17	30	45
435330	30	31	30	30	30	30	29	30	30	32	32	38	36	31	32	44	44	44	54	32	58	37	37	43	44	43	44	45	45	44	44	42	52	53	52	53	45	57	57	58	58	41	43	59	58	57	64	57	41
436366	25	26	25	25	25	25	24	25	25	27	28	34	32	26	27	7	7	7	35	28	37	33	33	39	40	39	40	41	41	41	40	24	32	33	32	33	8	37	38	38	37	37	39	38	38	36	45	36	37
443038	38	39	38	38	38	38	37	38	38	40	41	46	44	39	40	39	39	38	35	40	37	45	45	51	52	51	52	53	53	54	52	21	32	33	32	33	40	37	38	38	23	49	51	24	24	22	43	22	49
444019	40	40	40	39	39	39	38	40	39	41	41	47	45	40	41	39	38	36	35	41	39	46	46	52	54	52	53	54	55	53	53	20	33	33	32	33	39	37	38	38	5	51	53	5	5	3	43	3	50
444046	40	41	40	40	40	40	39	40	40	42	42	48	46	41	42	39	39	37	36	42	39	47	47	53	54	53	54	55	55	54	54	21	33	34	33	34	40	38	39	39	5	51	53	6	6	4	43	4	51
451392	35	36	35	35	35	35	35	35	35	37	37	44	42	36	38	36	36	34	33	38	35	43	43	49	50	49	50	51	51	51	50	20	30	31	30	31	38	35	36	36	32	46	49	33	33	32	18	31	46
451569	35	38	35	35	37	37	35	36	35	37	37	45	42	36	39	35	35	35	32	38	35	43	44	51	50	50	51	52	51	51	51	19	29	30	30	31	36	35	36	36	31	46	50	32	32	31	18	30	46
451824	43	43	43	42	42	42	41	43	42	44	45	50	48	43	44	41	40	38	37	44	41	49	49	55	57	55	56	57	58	60	56	22	35	35	34	35	41	39	40	40	7	54	56	7	7	5	45	5	53
451833	43	43	43	42	43	43	42	44	42	44	44	51	48	43	44	42	41	40	38	44	43	49	50	56	57	55	56	57	57	56	57	23	36	36	36	36	42	41	42	42	8	54	56	8	8	7	47	6	53
451879	43	44	43	42	43	44	42	44	42	44	45	51	48	43	44	42	41	39	38	44	43	49	50	56	57	56	57	58	58	62	57	23	37	36	36	37	42	41	42	42	8	54	57	9	8	7	47	6	54
451930	27	26	27	26	28	26	25	28	25	27	27	36	32	26	28	8	7	8	35	29	39	33	35	42	41	40	42	42	42	44	41	24	33	34	34	33	9	39	40	40	39	38	42	38	38	38	48	37	38
451967	25	27	25	25	25	26	25	25	25	27	29	34	32	26	28	7	7	7	35	28	37	33	33	39	40	39	40	41	41	47	40	24	33	33	32	34	9	37	38	38	37	37	39	39	38	37	45	36	38
454265	46	46	46	45	47	45	44	46	45	47	47	53	52	46	47	47	46	45	42	47	45	52	53	59	61	59	59	60	61	64	60	28	40	40	39	40	48	44	45	45	31	57	59	31	31	29	51	30	56
4604	19	20	19	19	20	19	18	19	19	21	21	17	15	20	21	34	34	34	43	11	47	16	16	7	23	12	13	14	14	17	23	32	41	42	41	42	35	46	46	47	47	20	12	48	47	46	54	46	20
4605	15	16	15	15	15	15	14	15	15	17	18	13	11	16	17	30	30	30	39	5	43	12	12	18	19	18	19	20	20	20	19	28	37	38	37	38	31	42	42	43	43	16	18	44	43	42	50	42	16
4606	11	12	11	11	11	11	10	11	11	13	14	9	7	12	13	26	26	26	35	2	39	8	8	14	15	14	15	16	16	17	15	24	33	34	33	34	27	38	38	39	39	12	14	40	39	38	46	38	12
4607	16	17	16	16	16	16	15	16	16	18	19	14	12	17	18	31	31	31	40	8	44	13	13	19	20	19	20	21	21	22	20	29	38	39	38	39	32	43	43	44	44	17	19	45	44	43	51	43	17
4608	16	17	16	16	16	16	16	16	16	18	19	14	12	17	19	31	31	31	40	8	44	13	13	19	20	19	20	21	21	23	20	29	38	39	38	39	33	43	43	44	44	17	19	45	44	44	51	43	17
4610	11	12	11	11	11	11	10	11	11	13	14	4	2	12	13	26	26	26	35	2	39	3	3	14	15	14	15	16	16	16	15	24	33	34	33	34	27	38	38	39	39	10	14	40	39	38	46	38	10
461803	26	27	26	26	27	27	27	27	26	28	28	36	33	27	29	26	26	26	22	29	26	34	35	41	41	41	42	43	42	45	42	1	19	20	20	20	28	25	26	26	21	37	41	22	22	22	32	20	37
461812	28	29	28	28	28	28	27	28	28	30	30	37	35	29	30	29	29	28	25	31	28	36	36	42	43	42	43	44	44	43	43	2	22	23	22	23	30	27	28	28	24	39	42	25	25	23	34	23	39
467029	25	25	25	25	26	25	25	26	24	26	29	35	31	25	28	25	25	25	21	28	25	32	34	40	39	39	41	41	40	43	40	0	18	20	20	19	28	25	26	26	21	35	40	21	21	22	32	20	36
467162	32	35	32	31	35	34	30	33	31	32	35	41	39	31	36	32	31	32	28	34	32	39	43	46	48	47	47	47	47	45	48	6	28	26	26	29	35	31	32	32	28	42	47	29	27	27	39	29	44
470670	33	34	33	33	33	33	33	33	33	35	36	41	39	34	36	47	47	47	57	35	61	40	40	46	47	46	47	48	48	50	47	45	55	56	55	56	49	60	60	61	61	44	46	62	61	61	67	60	44
473349	45	46	45	45	45	45	45	45	45	47	48	53	51	46	48	46	46	45	42	47	44	52	52	58	59	58	59	60	60	62	59	28	39	40	39	40	48	44	45	45	30	56	58	31	31	30	50	29	56
473376	35	36	35	35	35	35	35	35	35	37	37	44	42	36	38	34	34	32	32	38	34	43	43	49	50	49	50	51	51	51	50	19	29	30	29	30	36	34	35	35	31	46	49	32	32	31	17	30	46
473400	32	33	32	32	32	32	32	32	32	34	34	40	38	33	35	46	46	46	56	34	60	39	39	45	46	45	46	47	47	47	46	44	54	55	54	55	48	59	59	60	60	43	45	61	60	60	66	59	43
482055	36	37	36	36	36	36	36	36	36	38	39	45	43	37	39	37	37	35	34	39	36	44	44	50	51	50	51	52	52	54	51	21	31	32	31	32	39	36	37	37	33	47	50	34	34	33	19	32	47
4840	15	16	15	15	15	15	15	15	15	17	18	13	11	16	18	30	30	30	39	7	43	12	12	18	19	18	19	20	20	22	19	28	37	38	37	38	32	42	42	43	43	16	18	44	43	43	50	42	16
4843	18	20	18	18	19	19	18	19	17	19	21	17	13	18	22	32	32	33	41	10	46	14	16	22	21	21	23	23	22	23	22	30	40	41	41	42	35	46	46	47	46	18	22	47	45	47	54	46	20
4844	15	16	15	15	15	15	15	15	15	17	18	13	11	16	18	30	30	30	39	7	43	12	12	18	19	18	19	20	20	23	19	28	37	38	37	38	32	42	42	43	43	16	18	44	43	43	50	42	16
490434	33	34	33	33	33	33	33	33	33	35	35	42	40	34	36	34	34	32	31	36	33	41	41	47	48	47	48	49	49	51	48	18	28	29	28	29	36	33	34	34	30	44	47	31	31	30	16	29	44
490896	42	43	42	42	42	43	42	42	42	44	46	50	48	43	45	41	41	40	38	44	41	49	49	55	56	55	56	57	57	59	56	23	35	36	35	37	43	40	41	41	7	53	55	8	8	7	45	6	53
4938	16	17	16	16	16	16	15	16	16	18	18	4	2	17	18	31	31	31	40	8	44	3	3	19	20	18	19	20	20	22	20	29	38	39	38	39	32	43	43	44	44	13	18	45	44	43	51	43	13
506948	45	46	45	45	46	45	45	45	45	47	47	53	51	46	48	45	45	44	42	47	44	52	52	59	59	58	59	60	60	63	59	27	39	40	39	40	47	44	45	45	30	56	58	31	31	30	49	29	56
529277	35	36	35	35	35	35	34	35	35	37	37	43	41	36	37	45	45	45	57	37	60	42	42	48	49	48	49	50	50	49	49	45	54	55	54	55	46	59	60	60	61	46	48	62	62	60	67	60	46
535995	49	52	49	48	52	51	47	50	48	49	52	57	55	48	53	47	46	46	44	50	48	55	59	62	64	63	63	63	63	61	64	28	44	42	42	45	50	47	48	48	14	59	63	15	13	13	53	15	61
5394	16	17	16	16	16	16	15	16	16	18	19	14	12	17	18	31	31	31	40	8	44	13	13	19	20	19	20	21	21	21	20	29	38	39	38	39	32	43	43	44	44	17	19	45	44	43	51	43	17
5395	17	18	17	16	17	16	15	17	16	18	23	14	12	17	18	32	31	31	40	8	45	13	13	20	21	19	20	21	22	27	20	29	39	39	38	39	32	43	43	44	45	18	20	45	44	43	52	43	17
5397	18	19	18	18	18	18	17	18	18	20	20	16	14	19	20	33	33	33	42	10	46	15	15	21	22	21	22	23	23	22	22	31	40	41	40	41	34	45	45	46	46	19	21	47	46	45	53	45	19
540924	48	49	48	48	49	49	49	49	48	50	50	57	54	49	51	47	47	45	44	50	48	55	56	62	62	61	62	63	62	62	63	29	41	42	42	42	49	47	48	48	12	59	61	14	14	14	52	12	59
540933	50	53	50	49	53	52	48	51	49	50	53	58	56	49	54	48	47	47	45	51	49	56	60	63	65	64	64	64	64	62	65	29	45	43	43	46	51	48	49	49	15	60	64	16	14	14	54	16	62
546502	37	40	37	36	40	39	35	38	36	37	40	45	43	36	41	46	45	47	58	38	62	43	47	50	52	51	51	51	51	49	52	45	58	56	56	59	49	61	62	62	63	47	51	64	62	62	70	64	49
546742	34	37	34	33	37	36	32	35	33	34	37	43	41	33	38	34	33	33	31	36	34	41	45	48	50	49	49	49	49	47	50	17	31	29	29	32	37	34	35	35	31	44	49	32	30	30	18	32	46
552877	47	50	47	46	50	49	45	48	46	47	50	55	53	46	51	45	44	44	42	48	46	53	57	60	62	61	61	61	61	59	62	26	42	40	40	43	48	45	46	46	12	57	61	13	11	11	51	13	59
552895	34	33	34	33	33	32	31	34	32	34	35	42	39	33	35	34	33	31	30	36	33	40	41	47	48	46	48	48	49	48	47	17	28	29	28	28	35	33	34	34	31	44	48	30	30	29	17	29	44
552901	51	50	51	50	52	50	49	52	49	51	51	59	55	50	52	49	48	47	45	52	50	56	58	65	64	63	65	65	65	67	64	30	43	44	44	43	50	49	50	50	16	61	65	15	15	15	55	14	61
553034	32	33	32	32	32	32	31	32	32	34	35	41	39	33	34	34	34	32	30	35	32	40	40	46	47	46	47	48	48	51	47	17	27	28	27	28	35	32	33	33	29	43	46	30	30	28	15	28	43
553043	34	35	34	34	35	34	33	34	34	36	37	43	41	35	36	36	36	34	32	37	34	42	42	49	49	48	49	50	50	53	49	19	29	30	29	30	37	34	35	35	31	45	48	32	32	30	17	30	45
556396	33	34	33	33	33	33	32	33	33	35	35	42	40	34	35	33	33	31	30	36	32	41	41	47	48	47	48	49	49	51	48	17	27	28	27	28	34	32	33	33	29	44	47	30	30	28	15	28	44
5709	19	20	19	19	19	19	18	19	19	21	22	17	15	20	21	33	33	33	43	11	47	16	16	22	23	22	23	24	24	26	23	31	41	42	41	42	34	46	46	47	47	20	22	48	47	46	53	46	20
5710	19	20	19	19	19	19	19	19	19	21	22	27	25	20	22	34	34	34	43	21	47	26	26	32	33	32	33	34	34	36	33	32	41	42	41	42	36	46	46	47	47	30	32	48	47	47	54	46	30
588784	40	42	41	41	41	41	39	40	41	43	44	50	48	42	43	42	42	40	39	44	41	49	49	55	56	55	56	56	57	56	55	25	36	37	35	37	43	41	42	42	38	52	55	39	39	36	23	37	52
589084	39	41	40	40	40	40	38	39	40	42	43	49	47	41	42	41	41	39	38	43	40	48	48	54	55	54	55	55	56	55	54	24	35	36	34	36	42	40	41	41	37	51	54	38	38	35	22	36	51
591414	40	41	40	40	40	40	39	40	40	42	43	49	47	41	42	41	41	39	38	43	40	48	48	54	55	54	55	56	56	56	55	25	35	36	35	36	42	40	41	41	37	51	54	38	38	36	23	36	51
591566	40	41	40	40	40	40	39	40	40	42	43	49	47	41	42	42	42	40	38	43	40	48	48	54	55	54	55	56	56	57	55	25	35	36	35	36	43	40	41	41	37	51	54	38	38	36	23	36	51
6212	16	17	16	16	16	16	16	16	16	18	19	24	22	17	19	30	30	29	40	18	44	23	23	29	30	29	30	31	31	35	30	28	38	39	38	39	32	43	43	44	44	27	29	45	44	44	50	43	27
6221	38	40	38	38	38	39	37	38	38	40	41	47	45	39	40	42	42	41	50	41	52	46	46	51	53	51	52	53	53	54	53	41	48	48	47	49	43	52	53	53	53	49	51	54	54	52	63	52	50
6225	5	6	5	5	5	5	5	5	5	1	1	23	21	6	8	29	29	29	39	17	43	22	22	28	29	28	29	30	30	30	29	27	37	38	37	38	31	42	42	43	43	26	28	44	43	43	49	42	26
6226	17	19	17	17	17	18	16	17	17	19	21	15	13	18	19	32	32	32	41	9	45	14	14	20	21	20	21	22	22	24	21	30	40	40	39	41	33	44	44	45	45	18	20	47	45	44	52	44	19
6228	18	18	18	18	19	17	16	18	17	19	19	16	13	18	20	31	31	31	41	10	45	14	15	22	21	20	22	22	22	24	21	29	39	41	40	40	33	45	45	46	46	18	21	46	45	45	52	45	19
6230	18	19	18	17	18	19	17	19	17	19	21	16	13	18	19	33	32	33	41	9	47	14	15	21	22	21	22	23	23	24	22	30	41	40	40	41	33	45	45	46	46	19	22	47	45	45	54	44	19
6242	23	25	23	23	24	23	23	23	23	25	26	21	19	24	26	38	38	37	47	15	51	20	20	27	27	26	27	28	28	30	27	36	45	46	45	46	40	50	50	51	51	24	26	52	51	51	58	50	24
6245	18	19	18	18	18	18	18	18	18	20	21	12	10	19	21	33	33	33	42	10	46	11	11	21	22	21	22	23	23	24	22	31	40	41	40	41	35	45	45	46	46	13	21	47	46	46	53	45	13
6246	14	15	14	14	14	14	14	14	14	16	16	8	6	15	17	28	28	28	38	6	41	7	7	17	18	17	18	19	19	20	18	27	35	36	35	36	30	40	41	41	41	8	17	42	42	41	49	40	8
6247	14	15	14	14	14	14	14	14	14	16	17	22	20	15	17	28	28	27	38	16	42	21	21	27	28	27	28	29	29	31	28	26	36	37	36	37	30	41	41	42	42	25	27	43	42	42	48	41	25
6249	15	16	15	15	15	15	15	15	15	17	18	23	21	16	18	29	29	29	39	17	43	22	22	28	29	28	29	30	30	33	29	26	37	38	37	38	31	42	42	43	43	26	28	44	43	43	48	42	26
6250	17	18	17	17	17	17	17	17	17	19	19	25	23	18	20	31	31	30	41	19	45	24	24	30	31	30	31	32	32	33	31	28	39	40	39	40	33	44	44	45	45	28	30	46	45	45	50	44	28
6251	16	17	16	16	16	16	16	16	16	18	18	24	22	17	19	30	30	29	40	18	44	23	23	29	30	29	30	31	31	32	30	28	38	39	38	39	32	43	43	44	44	27	29	45	44	44	50	43	27
646320	29	30	29	29	29	29	28	29	29	31	32	38	36	30	31	11	11	11	39	32	41	37	37	43	44	43	44	45	45	45	44	28	36	37	36	37	12	41	42	42	41	41	43	42	42	40	49	40	41
6675	19	20	19	19	19	19	19	19	19	21	22	27	25	20	22	34	34	34	43	21	47	26	26	32	33	32	33	34	34	37	33	32	41	42	41	42	36	46	46	47	47	30	32	48	47	47	54	46	30
6684	23	24	23	23	23	23	22	23	23	25	25	21	19	24	25	38	38	37	47	15	51	20	20	26	27	26	27	28	28	28	27	36	45	46	45	46	39	50	50	51	51	24	26	52	51	50	58	50	24
6688	26	29	26	25	29	28	24	27	25	26	29	24	22	25	30	40	39	40	49	17	54	22	26	29	31	30	30	30	30	28	31	37	50	48	48	51	43	53	53	54	54	26	30	55	52	53	62	55	28
6689	25	26	25	25	25	25	25	25	25	27	27	23	21	26	28	40	40	39	49	17	53	22	22	28	29	28	29	30	30	30	29	38	47	48	47	48	42	52	52	53	53	26	28	54	53	53	60	52	26
6690	23	24	23	23	23	23	22	23	23	25	26	21	19	24	25	38	38	37	47	15	51	20	20	26	27	26	27	28	28	29	27	36	45	46	45	46	39	50	50	51	51	24	26	52	51	50	58	50	24
670776	35	38	35	34	38	37	33	36	34	35	38	29	27	34	39	49	48	50	58	26	63	27	31	38	40	39	39	39	39	37	40	45	59	57	57	60	52	62	62	63	63	15	39	64	61	62	70	64	15
675734	44	45	44	44	45	44	44	44	44	46	46	50	48	45	47	43	43	42	9	44	12	49	49	56	56	55	56	57	57	62	56	28	16	17	16	17	45	11	12	12	42	53	55	43	43	42	50	41	53
675776	41	41	41	40	40	40	39	41	40	42	42	47	45	41	42	43	42	41	9	41	14	46	46	52	54	52	53	54	55	55	53	28	18	18	17	18	43	12	12	13	42	51	53	42	41	40	51	40	50
696530	46	50	46	46	50	49	44	47	46	47	50	53	50	45	51	46	45	46	12	46	16	50	54	58	60	59	59	58	58	57	59	29	22	19	19	23	48	15	16	16	46	54	58	46	45	45	54	47	56
6980	20	21	20	20	20	20	19	20	20	22	25	18	16	21	22	35	35	35	44	12	48	17	17	23	24	23	24	25	25	29	24	33	42	43	42	43	36	47	47	48	48	21	23	49	48	47	54	47	21
6981	15	16	15	15	15	15	15	15	15	17	18	13	11	16	18	30	30	30	39	7	43	12	12	18	19	18	19	20	20	22	19	28	37	38	37	38	32	42	42	43	43	16	18	44	43	43	50	42	16
6983	19	20	19	19	19	19	19	19	19	21	22	17	15	20	22	34	34	34	43	11	47	16	16	22	23	22	23	24	24	25	23	32	41	42	41	42	36	46	46	47	47	20	22	48	47	47	54	46	20
6984	20	21	20	20	20	20	19	20	20	22	23	18	16	21	22	35	35	35	44	12	48	17	17	23	24	23	24	25	25	26	24	33	42	43	42	43	36	47	47	48	48	21	23	49	48	47	54	47	21
6988	16	19	16	16	16	17	16	16	16	18	21	14	12	17	20	31	31	32	40	8	44	13	13	19	20	19	20	21	21	25	20	29	38	39	38	40	33	43	43	44	44	17	19	45	44	44	51	43	17
6992	15	16	15	15	15	15	15	15	15	17	18	13	11	16	18	30	30	30	39	7	43	12	12	18	19	18	19	20	20	21	19	28	37	38	37	38	32	42	42	43	43	16	18	44	43	43	50	42	16
6994	21	23	21	21	23	23	21	22	21	23	26	20	17	22	23	36	36	37	45	13	50	18	19	26	25	25	26	27	26	33	26	34	43	44	44	45	37	49	49	50	49	22	25	50	49	49	57	48	22
6995	19	20	19	19	19	19	19	19	19	21	21	17	15	20	22	34	34	34	43	11	47	16	16	22	23	22	23	24	24	25	23	32	41	42	41	42	36	46	46	47	47	20	22	48	47	47	54	46	20
6996	20	20	20	20	20	19	18	20	19	21	22	18	15	20	22	34	34	34	43	12	47	16	17	23	23	22	24	24	24	25	23	32	41	43	42	42	36	47	47	48	48	20	23	48	47	47	55	47	21
6998	16	17	16	16	16	16	16	16	16	18	19	14	12	17	19	31	31	31	40	8	44	13	13	19	20	19	20	21	21	22	20	29	38	39	38	39	33	43	43	44	44	17	19	45	44	44	51	43	17
757123	19	20	19	19	20	20	20	20	19	21	21	26	23	20	22	34	34	35	43	19	48	24	25	31	31	31	32	33	32	33	32	32	41	42	42	42	36	47	47	48	47	28	31	48	47	48	55	46	28
764375	19	20	19	19	19	19	18	19	19	21	22	25	23	20	21	34	34	34	43	19	47	24	24	30	31	30	31	32	32	34	31	32	41	42	41	42	35	46	46	47	47	28	30	48	47	46	54	46	28
779159	34	34	34	33	33	33	32	34	33	35	36	31	29	34	35	48	47	47	57	25	62	30	30	36	38	36	37	38	39	39	37	46	56	56	55	56	48	60	60	61	62	35	37	62	61	60	69	60	34
8222	21	22	21	21	21	21	20	21	21	23	24	19	17	22	23	36	36	36	45	13	49	18	18	24	25	24	25	26	26	26	25	34	43	44	43	44	37	48	48	49	49	22	24	50	49	48	56	48	22
8223	21	21	21	21	21	20	19	21	20	22	23	19	16	21	23	35	35	35	44	13	48	17	18	24	24	23	25	25	25	26	24	33	42	44	43	43	37	48	48	49	49	21	24	49	48	48	56	48	22
8230	20	21	20	20	20	20	20	20	20	22	22	18	16	21	23	35	35	35	44	12	48	17	17	23	24	23	24	25	25	26	24	33	42	43	42	43	37	47	47	48	48	21	23	49	48	48	55	47	21
8231	19	20	19	19	19	19	18	19	19	21	21	17	15	20	21	34	34	34	43	11	47	16	16	22	23	22	23	24	24	23	23	32	41	42	41	42	35	46	46	47	47	20	22	48	47	46	54	46	20
8232	22	25	22	22	23	24	22	23	21	23	26	21	17	22	26	36	36	38	45	14	50	18	20	26	25	25	27	27	26	28	26	34	44	45	45	46	39	50	50	51	50	22	26	51	49	51	58	49	24
8236	20	21	20	20	20	20	19	20	20	22	22	18	16	21	22	35	35	35	44	12	48	17	17	23	24	23	24	25	25	24	24	33	42	43	42	43	36	47	47	48	48	21	23	49	48	47	55	47	21
827222	40	41	40	40	41	40	39	40	40	42	43	26	24	41	42	54	54	54	64	32	68	25	25	44	44	43	44	45	45	48	44	52	62	63	62	63	55	67	67	68	68	37	43	69	68	67	74	67	37
834054	40	41	40	40	41	40	39	40	40	42	45	26	24	41	42	54	54	54	64	32	68	25	25	44	44	43	44	45	45	50	44	52	62	63	62	63	55	67	67	68	68	37	43	69	68	67	74	67	37
850720	36	37	36	36	38	37	36	37	36	38	38	31	28	37	38	51	51	52	60	28	65	29	30	41	40	40	41	42	41	45	41	47	58	59	59	59	52	64	64	65	64	17	40	65	64	64	70	63	15
855190	34	35	34	34	34	34	33	34	34	36	36	28	26	35	36	49	49	49	58	26	62	27	27	37	38	37	38	39	39	38	38	46	56	57	56	57	50	61	61	62	62	15	37	63	62	61	68	61	13
860676	42	43	42	42	43	42	42	42	42	44	44	50	48	43	45	41	41	40	21	44	24	49	49	56	56	55	56	57	57	64	56	26	18	19	18	19	43	23	24	24	40	53	55	41	41	40	48	39	53
860802	42	43	42	42	43	42	41	42	42	44	44	50	48	43	44	41	41	40	21	44	24	49	49	56	56	55	56	57	57	59	56	26	18	19	18	19	42	23	24	24	40	53	55	41	41	39	48	39	53
861188	36	37	36	36	37	36	35	36	36	38	38	30	28	37	38	51	51	51	60	28	64	29	29	40	40	39	40	41	41	42	40	48	58	59	58	59	52	63	63	64	64	17	39	65	64	63	70	63	15
9455	17	18	17	17	18	17	16	17	17	19	19	25	23	18	19	31	31	30	41	19	45	24	24	31	31	30	31	32	32	35	31	29	39	40	39	40	32	44	44	45	45	28	30	46	45	44	51	44	28
9872	19	20	19	19	20	19	18	19	19	21	21	27	25	20	21	33	33	32	43	21	47	26	26	33	33	32	33	34	34	38	33	31	41	42	41	42	34	46	46	47	47	30	32	48	47	46	53	46	30
9891	35	37	36	35	37	36	35	35	35	37	39	44	43	36	39	35	35	35	32	38	36	43	43	51	51	49	51	52	51	56	50	19	30	30	29	30	37	34	35	35	31	47	49	33	33	32	41	31	46
9969	21	22	21	21	21	21	20	21	21	23	24	7	5	22	23	36	36	36	45	13	49	6	6	24	25	24	25	26	26	29	25	34	43	44	43	44	37	48	48	49	49	18	24	50	49	48	56	48	18
[truncated: 204 more columns]
