# Supplementary material for: Detecting, mapping, and suppressing the spread of a decade-long Pseudomonas aeruginosa nosocomial outbreak with genomics
Source: bioRxiv preprint, doi:10.1101/2023.07.24.550326, version 3 (2025-06-30)
Supplement: Supplemental Table 5 [file 550326_file17.xlsx]

## Sheet: Rec filtered
POS	REF	ALT	Locus tag	Counts independent mutations per locus (excluding SYN)	Name	RefSeq	Function	Type	Variant	Impact	AA change	Total isolate counts	Counts in SC1	Counts in SC2	MRSN10240	MRSN10241	MRSN10242	MRSN11335	MRSN11376	MRSN11488	MRSN11536	MRSN11537	MRSN11934	MRSN11978	MRSN11980	MRSN12426	MRSN12427	MRSN12428	MRSN14550	MRSN15738	MRSN16340	MRSN16343	MRSN16382	MRSN16386	MRSN16388	MRSN16389	MRSN16390	MRSN16391	MRSN16395	MRSN17460	MRSN19760	MRSN19762	MRSN22475	MRSN22477	MRSN22479	MRSN22524	MRSN22525	MRSN22526	MRSN22527
6109037	G	T	MRSN4605_05731	11	cbrA	NP_253413.1	two-component sensor CbrA	snp	missense_variant	MODERATE	p.Gly77Trp	11	11	0	-	-	-	-	-	-	-	-	-	-	-	-	-	-	-	-	-	-	-	-	-	-	-	-	-	-	+	-	+	-	-	+	-	-	-
6111089	G	A	MRSN4605_05731	11	cbrA	NP_253413.1	two-component sensor CbrA	snp	missense_variant	MODERATE	p.Ala761Thr	10	0	10	-	-	-	-	-	-	-	-	-	-	-	-	-	-	-	-	-	-	-	-	-	-	-	-	-	-	-	-	-	-	-	-	-	-	-
6109913	T	G	MRSN4605_05731	11	cbrA	NP_253413.1	two-component sensor CbrA	snp	missense_variant	MODERATE	p.Trp369Gly	8	8	0	-	-	-	-	-	-	-	-	-	-	-	-	-	-	-	-	-	-	-	-	-	-	-	-	-	-	-	-	-	+	+	-	-	+	+
6110306	G	A	MRSN4605_05731	11	cbrA	NP_253413.1	two-component sensor CbrA	snp	missense_variant	MODERATE	p.Glu500Lys	5	5	0	-	-	-	-	-	-	-	-	-	-	-	-	-	-	-	-	-	-	-	-	-	-	-	-	-	-	-	-	-	-	-	-	-	-	-
6110621	G	T	MRSN4605_05731	11	cbrA	NP_253413.1	two-component sensor CbrA	snp	missense_variant	MODERATE	p.Asp605Tyr	4	0	4	-	-	-	-	-	-	-	-	-	-	-	-	-	-	-	-	-	-	-	-	-	-	-	-	-	-	-	-	-	-	-	-	-	-	-
6111656	T	A	MRSN4605_05731	11	cbrA	NP_253413.1	two-component sensor CbrA	snp	missense_variant	MODERATE	p.Tyr950Asn	4	0	4	-	-	-	-	-	-	-	-	-	-	-	-	-	-	-	-	-	-	-	-	-	-	-	-	-	-	-	-	-	-	-	-	-	-	-
6109124	G	A	MRSN4605_05731	11	cbrA	NP_253413.1	two-component sensor CbrA	snp	missense_variant	MODERATE	p.Asp106Asn	3	3	0	-	-	-	-	-	-	-	-	-	-	-	-	-	-	-	-	-	-	-	-	-	-	-	-	-	-	-	-	-	-	-	-	-	-	-
6111041	G	A	MRSN4605_05731	11	cbrA	NP_253413.1	two-component sensor CbrA	snp	missense_variant	MODERATE	p.Glu745Lys	3	0	3	-	-	-	-	-	-	-	-	-	-	-	-	-	-	-	-	-	-	-	-	-	-	-	-	-	-	-	-	-	-	-	-	-	-	-
6111114	G	A	MRSN4605_05731	11	cbrA	NP_253413.1	two-component sensor CbrA	snp	missense_variant	MODERATE	p.Gly769Asp	3	3	0	-	-	-	-	-	-	-	-	-	-	-	-	-	-	-	-	-	-	-	-	-	-	-	-	-	-	-	-	-	-	-	-	-	+	+
6109953	T	TCAG	MRSN4605_05731	11	cbrA	NP_253413.1	two-component sensor CbrA	ins	disruptive_inframe_insertion	MODERATE	p.Ile382_Met383insSer	1	1	0	-	-	-	-	-	-	-	-	-	-	-	-	-	-	-	-	-	-	-	-	-	-	-	-	-	-	-	-	-	-	-	-	-	-	-
6111242	T	C	MRSN4605_05731	11	cbrA	NP_253413.1	two-component sensor CbrA	snp	missense_variant	MODERATE	p.Ser812Pro	1	1	0	-	-	-	-	-	-	-	-	-	-	-	-	-	-	-	-	-	-	-	-	-	-	-	-	-	-	-	-	-	-	-	-	-	-	-
5958657	C	T	MRSN4605_05594	10	morA	NP_253291.1	motility regulator	snp	stop_gained	HIGH	p.Gln46*	13	13	0	-	-	-	-	-	-	-	-	-	-	-	+	+	-	-	-	+	+	-	-	-	-	-	-	-	-	-	-	-	-	-	-	-	-	-
5958785	GC	G	MRSN4605_05594	10	morA	NP_253291.1	motility regulator	del	frameshift_variant	HIGH	p.Ser91fs	1	0	1	-	-	-	-	-	-	-	-	-	-	-	-	-	-	-	-	-	-	-	-	-	-	-	-	-	-	-	-	-	-	-	-	-	-	-
5961865	G	T	MRSN4605_05594	10	morA	NP_253291.1	motility regulator	snp	missense_variant	MODERATE	p.Gly1115Val	9	9	0	-	-	-	-	-	-	-	-	-	-	-	-	-	-	-	-	-	-	-	-	-	-	-	-	-	-	+	-	+	-	-	+	-	-	-
5961763	T	G	MRSN4605_05594	10	morA	NP_253291.1	motility regulator	snp	missense_variant	MODERATE	p.Val1081Gly	4	4	0	-	-	-	-	-	-	-	-	-	-	-	-	-	-	-	-	-	-	-	-	-	-	-	-	-	-	-	-	-	-	-	-	-	-	-
5961025	T	G	MRSN4605_05594	10	morA	NP_253291.1	motility regulator	snp	missense_variant	MODERATE	p.Leu835Arg	3	0	3	-	-	-	-	-	-	-	-	-	-	-	-	-	-	-	-	-	-	-	-	-	-	-	-	-	-	-	-	-	-	-	-	-	-	-
5961595	A	C	MRSN4605_05594	10	morA	NP_253291.1	motility regulator	snp	missense_variant	MODERATE	p.Asp1025Ala	2	2	0	-	-	-	-	-	-	-	-	-	-	-	-	-	-	-	-	-	-	-	-	-	-	-	-	-	-	-	-	-	-	-	-	-	-	-
5962458	G	A	MRSN4605_05594	10	morA	NP_253291.1	motility regulator	snp	missense_variant	MODERATE	p.Gly1313Ser	2	2	0	-	-	-	-	-	-	-	-	-	-	-	-	-	-	-	-	-	-	-	-	-	-	-	-	-	-	-	-	-	-	-	-	-	-	-
5960713	T	C	MRSN4605_05594	10	morA	NP_253291.1	motility regulator	snp	missense_variant	MODERATE	p.Phe731Ser	1	1	0	-	-	-	-	-	-	-	-	-	-	-	-	-	-	-	-	-	-	-	-	-	-	-	-	-	-	-	-	-	-	-	-	-	-	-
5961090	A	G	MRSN4605_05594	10	morA	NP_253291.1	motility regulator	snp	missense_variant	MODERATE	p.Thr857Ala	1	0	1	-	-	-	-	-	-	-	-	-	-	-	-	-	-	-	-	-	-	-	-	-	-	-	-	-	-	-	-	-	-	-	-	-	-	-
5962303	A	AGCGGAT	MRSN4605_05594	10	morA	NP_253291.1	motility regulator	ins	disruptive_inframe_insertion	MODERATE	p.Arg1262_Ile1263insMetArg	1	1	0	-	-	-	-	-	-	-	-	-	-	-	-	-	-	-	-	-	-	-	-	-	-	-	-	-	-	-	-	-	-	-	-	-	-	-
591494	G	A	MRSN4605_00540	8	.	NP_249224.1	putative transcriptional regulator	snp	missense_variant	MODERATE	p.Ser139Asn	51	0	51	-	-	-	-	-	-	-	-	-	-	-	-	-	-	-	-	-	-	-	-	-	-	-	-	-	-	-	-	-	-	-	-	-	-	-
591770	T	A	MRSN4605_00540	8	.	NP_249224.1	putative transcriptional regulator	snp	missense_variant	MODERATE	p.Val231Glu	13	13	0	-	-	-	-	-	-	-	-	-	-	-	-	-	-	-	-	-	-	-	-	-	-	-	-	-	-	-	-	-	-	-	-	-	-	-
591433	A	C	MRSN4605_00540	8	.	NP_249224.1	putative transcriptional regulator	snp	missense_variant	MODERATE	p.Thr119Pro	8	8	0	-	-	-	-	-	-	-	-	-	-	-	-	-	-	-	-	-	-	-	-	-	-	-	-	-	-	-	-	-	+	+	-	-	+	+
592090	C	T	MRSN4605_00540	8	.	NP_249224.1	putative transcriptional regulator	snp	missense_variant	MODERATE	p.Arg338Cys	8	8	0	-	-	-	-	-	-	-	-	-	-	-	-	-	-	-	-	-	-	+	-	+	+	+	+	+	-	-	+	-	-	-	-	-	-	-
591904	G	T	MRSN4605_00540	8	.	NP_249224.1	putative transcriptional regulator	snp	missense_variant	MODERATE	p.Ala276Ser	3	3	0	-	-	-	-	-	-	-	-	-	-	-	-	-	-	-	-	-	-	-	-	-	-	-	-	-	-	-	-	-	-	-	-	-	-	-
592159	G	A	MRSN4605_00540	8	.	NP_249224.1	putative transcriptional regulator	snp	missense_variant	MODERATE	p.Val361Met	2	2	0	-	-	-	-	-	-	-	-	-	-	-	-	-	-	-	-	-	-	-	-	-	-	-	-	-	-	-	-	-	-	-	-	-	-	-
591881	G	T	MRSN4605_00540	8	.	NP_249224.1	putative transcriptional regulator	snp	missense_variant	MODERATE	p.Arg268Leu	1	0	1	-	-	-	-	-	-	-	-	-	-	-	-	-	-	-	-	-	-	-	-	-	-	-	-	-	-	-	-	-	-	-	-	-	-	-
592145	T	G	MRSN4605_00540	8	.	NP_249224.1	putative transcriptional regulator	snp	missense_variant	MODERATE	p.Val356Gly	1	1	0	-	-	-	-	-	-	-	-	-	-	-	-	-	-	-	-	-	-	-	-	-	-	-	-	-	-	-	-	-	-	-	-	-	-	-
585815	CAGGTA	C	MRSN4605_00533	8	dnr	NP_249218.1	transcriptional regulator Dnr	del	frameshift_variant	HIGH	p.Tyr160fs	1	0	1	-	-	-	-	-	-	-	-	-	-	-	-	-	-	-	-	-	-	-	-	-	-	-	-	-	-	-	-	-	-	-	-	-	-	-
585739	G	A	MRSN4605_00533	8	dnr	NP_249218.1	transcriptional regulator Dnr	snp	missense_variant	MODERATE	p.His187Tyr	118	2	116	-	-	-	-	-	-	-	-	-	-	-	-	-	-	-	-	-	-	-	-	-	-	-	-	-	-	-	-	-	-	-	-	-	-	-
585619	C	T	MRSN4605_00533	8	dnr	NP_249218.1	transcriptional regulator Dnr	snp	missense_variant	MODERATE	p.Glu227Lys	11	0	11	-	-	-	-	-	-	-	-	-	-	-	-	-	-	-	-	-	-	-	-	-	-	-	-	-	-	-	-	-	-	-	-	-	-	-
585726	T	C	MRSN4605_00533	8	dnr	NP_249218.1	transcriptional regulator Dnr	snp	missense_variant	MODERATE	p.Gln191Arg	4	4	0	-	-	-	-	-	-	-	-	-	-	-	-	-	-	-	-	-	-	-	-	-	-	-	-	-	-	-	-	-	-	-	-	-	-	-
585813	A	C	MRSN4605_00533	8	dnr	NP_249218.1	transcriptional regulator Dnr	snp	missense_variant	MODERATE	p.Leu162Arg	4	4	0	-	-	-	-	-	-	-	-	-	-	-	-	-	-	-	-	-	-	-	-	-	-	-	-	-	-	-	-	-	-	-	-	-	-	-
586253	G	C	MRSN4605_00533	8	dnr	NP_249218.1	transcriptional regulator Dnr	snp	missense_variant	MODERATE	p.His15Gln	2	2	0	-	-	-	-	-	-	-	-	-	-	-	-	-	-	-	-	-	-	-	+	-	-	-	-	-	+	-	-	-	-	-	-	-	-	-
586254	T	G	MRSN4605_00533	8	dnr	NP_249218.1	transcriptional regulator Dnr	snp	missense_variant	MODERATE	p.His15Pro	1	1	0	-	-	-	-	-	-	-	-	-	-	-	-	-	-	-	-	-	-	-	-	-	-	-	-	-	-	-	-	-	-	-	-	-	-	-
586258	G	A	MRSN4605_00533	8	dnr	NP_249218.1	transcriptional regulator Dnr	snp	missense_variant	MODERATE	p.His14Tyr	1	1	0	-	-	-	-	-	-	-	-	-	-	-	-	-	-	-	-	-	-	-	-	-	-	-	-	-	-	-	-	-	-	-	-	-	-	-
3164753	GA	G	MRSN4605_02972	7	pvdS	NP_251116.1	sigma factor PvdS	del	frameshift_variant	HIGH	p.Phe60fs	3	3	0	-	-	-	-	-	-	-	-	-	-	-	-	-	-	-	-	-	-	-	-	-	-	-	-	-	-	-	-	-	-	-	-	-	-	-
3164733	A	C	MRSN4605_02972	7	pvdS	NP_251116.1	sigma factor PvdS	snp	missense_variant	MODERATE	p.Leu67Arg	51	0	51	-	-	-	-	-	-	-	-	-	-	-	-	-	-	-	-	-	-	-	-	-	-	-	-	-	-	-	-	-	-	-	-	-	-	-
3164721	A	G	MRSN4605_02972	7	pvdS	NP_251116.1	sigma factor PvdS	snp	missense_variant	MODERATE	p.Val71Ala	5	0	5	-	-	-	-	-	-	-	-	-	-	-	-	-	-	-	-	-	-	-	-	-	-	-	-	-	-	-	-	-	-	-	-	-	-	-
3164515	C	T	MRSN4605_02972	7	pvdS	NP_251116.1	sigma factor PvdS	snp	missense_variant	MODERATE	p.Gly140Ser	2	2	0	-	-	-	-	-	-	-	-	-	-	-	-	-	-	-	-	-	-	-	-	-	-	-	-	-	-	-	-	-	-	-	-	-	-	-
3164611	A	G	MRSN4605_02972	7	pvdS	NP_251116.1	sigma factor PvdS	snp	missense_variant	MODERATE	p.Ser108Pro	2	0	2	-	-	-	-	-	-	-	-	-	-	-	-	-	-	-	-	-	-	-	-	-	-	-	-	-	-	-	-	-	-	-	-	-	-	-
3164772	G	A	MRSN4605_02972	7	pvdS	NP_251116.1	sigma factor PvdS	snp	missense_variant	MODERATE	p.Pro54Leu	1	0	1	-	-	-	-	-	-	-	-	-	-	-	-	-	-	-	-	-	-	-	-	-	-	-	-	-	-	-	-	-	-	-	-	-	-	-
3164818	C	T	MRSN4605_02972	7	pvdS	NP_251116.1	sigma factor PvdS	snp	missense_variant	MODERATE	p.Ala39Thr	1	1	0	-	-	-	-	-	-	-	-	-	-	-	-	-	-	-	-	-	-	-	-	-	-	-	-	-	-	-	-	-	-	-	-	-	-	-
6780488	na	na	MRSN4605_06325	6	BetT2	NP_253978.4	BetT	manual	frameshift variant	HIGH	D424*	92	92	0	-	-	-	-	-	-	-	-	-	-	-	+	+	-	-	+	+	+	+	+	+	+	+	+	+	+	+	+	+	+	+	+	-	+	+
6780488	na	na	MRSN4605_06325	6	BetT2	NP_253978.5	BetT	manual	stop gained	HIGH	W444*	7	0	7	-	-	-	-	-	-	-	-	-	-	-	-	-	-	-	-	-	-	-	-	-	-	-	-	-	-	-	-	-	-	-	-	-	-	-
6780488	na	na	MRSN4605_06325	6	BetT2	NP_253978.3	BetT	manual	frameshift variant	HIGH	A525	3	0	3	-	-	-	-	-	-	-	-	-	-	-	-	-	-	-	-	-	-	-	-	-	-	-	-	-	-	-	-	-	-	-	-	-	-	-
6780488	na	na	MRSN4605_06325	6	BetT2	NP_253978.2	BetT	manual	conservative inframe insertion	MODERATE	Y17	31	31	0	+	+	+	+	+	+	+	+	+	+	+	-	-	+	+	-	-	-	-	-	-	-	-	-	-	-	-	-	-	-	-	-	+	-	-
6780488	na	na	MRSN4605_06325	6	BetT2	NP_253978.6	BetT	manual	missense variant	MODERATE	V623F	31	0	31	-	-	-	-	-	-	-	-	-	-	-	-	-	-	-	-	-	-	-	-	-	-	-	-	-	-	-	-	-	-	-	-	-	-	-
6780488	na	na	MRSN4605_06325	6	BetT2	NP_253978.1	BetT	manual	conservative inframe deletion	MODERATE	GWWL322	3	0	3	-	-	-	-	-	-	-	-	-	-	-	-	-	-	-	-	-	-	-	-	-	-	-	-	-	-	-	-	-	-	-	-	-	-	-
5026004	na	na	MRSN4605_04715	6	oprD	NP_249649.3	Basic amino acid%2C basic peptide and imipenem outer membrane porin OprD precursor	manual	stop gained	HIGH	R6*	115	0	115	-	-	-	-	-	-	-	-	-	-	-	-	-	-	-	-	-	-	-	-	-	-	-	-	-	-	-	-	-	-	-	-	-	-	-
5026004	na	na	MRSN4605_04715	6	oprD	NP_249649.4	Basic amino acid%2C basic peptide and imipenem outer membrane porin OprD precursor	manual	frameshift variant	HIGH	R318*	92	92	0	-	-	-	-	-	-	-	-	-	-	-	+	+	-	-	+	+	+	+	+	+	+	+	+	+	+	+	+	+	+	+	+	-	+	+
5026004	na	na	MRSN4605_04715	6	oprD	NP_249649.5	Basic amino acid%2C basic peptide and imipenem outer membrane porin OprD precursor	manual	frameshift variant	HIGH	R260*	31	31	0	+	+	+	+	+	+	+	+	+	+	+	-	-	+	+	-	-	-	-	-	-	-	-	-	-	-	-	-	-	-	-	-	+	-	-
5026004	na	na	MRSN4605_04715	6	oprD	NP_249649.2	Basic amino acid%2C basic peptide and imipenem outer membrane porin OprD precursor	manual	frameshift variant	HIGH	Indel	11	0	11	-	-	-	-	-	-	-	-	-	-	-	-	-	-	-	-	-	-	-	-	-	-	-	-	-	-	-	-	-	-	-	-	-	-	-
5026004	na	na	MRSN4605_04715	6	oprD	NP_249649.6	Basic amino acid%2C basic peptide and imipenem outer membrane porin OprD precursor	manual	frameshift variant	HIGH	R432*	1	0	1	-	-	-	-	-	-	-	-	-	-	-	-	-	-	-	-	-	-	-	-	-	-	-	-	-	-	-	-	-	-	-	-	-	-	-
5026004	na	na	MRSN4605_04715	6	oprD	NP_249649.7	Basic amino acid%2C basic peptide and imipenem outer membrane porin OprD precursor	manual	missense variant	MODERATE	R6Y	1	0	1	-	-	-	-	-	-	-	-	-	-	-	-	-	-	-	-	-	-	-	-	-	-	-	-	-	-	-	-	-	-	-	-	-	-	-
6635687	C	T	MRSN4605_06193	6	rmlA	NP_253850.1	glucose-1-phosphate thymidylyltransferase	snp	stop_gained	HIGH	p.Gln267*	2	0	2	-	-	-	-	-	-	-	-	-	-	-	-	-	-	-	-	-	-	-	-	-	-	-	-	-	-	-	-	-	-	-	-	-	-	-
6635147	G	A	MRSN4605_06193	6	rmlA	NP_253850.1	glucose-1-phosphate thymidylyltransferase	snp	missense_variant	MODERATE	p.Gly87Ser	8	0	8	-	-	-	-	-	-	-	-	-	-	-	-	-	-	-	-	-	-	-	-	-	-	-	-	-	-	-	-	-	-	-	-	-	-	-
6635399	G	A	MRSN4605_06193	6	rmlA	NP_253850.1	glucose-1-phosphate thymidylyltransferase	snp	missense_variant	MODERATE	p.Ala171Thr	2	0	2	-	-	-	-	-	-	-	-	-	-	-	-	-	-	-	-	-	-	-	-	-	-	-	-	-	-	-	-	-	-	-	-	-	-	-
6634938	A	C	MRSN4605_06193	6	rmlA	NP_253850.1	glucose-1-phosphate thymidylyltransferase	snp	missense_variant	MODERATE	p.His17Pro	1	0	1	-	-	-	-	-	-	-	-	-	-	-	-	-	-	-	-	-	-	-	-	-	-	-	-	-	-	-	-	-	-	-	-	-	-	-
6635012	A	C	MRSN4605_06193	6	rmlA	NP_253850.1	glucose-1-phosphate thymidylyltransferase	snp	missense_variant	MODERATE	p.Thr42Pro	1	0	1	-	-	-	-	-	-	-	-	-	-	-	-	-	-	-	-	-	-	-	-	-	-	-	-	-	-	-	-	-	-	-	-	-	-	-
6635310	A	T	MRSN4605_06193	6	rmlA	NP_253850.1	glucose-1-phosphate thymidylyltransferase	snp	missense_variant	MODERATE	p.Asp141Val	1	1	0	-	-	-	-	-	-	-	-	-	-	-	-	-	-	-	-	-	-	-	-	-	-	-	-	-	-	-	-	-	-	-	-	-	-	-
5780210	C	T	MRSN4605_05406	5	ampD	NP_253212.1	beta-lactamase expression regulator AmpD	snp	stop_gained	HIGH	p.Trp97*	51	0	51	-	-	-	-	-	-	-	-	-	-	-	-	-	-	-	-	-	-	-	-	-	-	-	-	-	-	-	-	-	-	-	-	-	-	-
5780085	G	T	MRSN4605_05406	5	ampD	NP_253212.1	beta-lactamase expression regulator AmpD	snp	missense_variant	MODERATE	p.Thr139Lys	8	8	0	-	-	-	-	-	-	-	-	-	-	-	-	-	-	-	-	-	-	-	-	-	-	-	-	-	-	-	-	-	+	+	-	-	+	+
5780209	G	A	MRSN4605_05406	5	ampD	NP_253212.1	beta-lactamase expression regulator AmpD	snp	missense_variant	MODERATE	p.His98Tyr	5	5	0	-	-	-	-	-	-	-	-	-	-	-	-	-	-	-	-	-	-	-	-	-	-	-	-	-	-	-	-	-	-	-	-	-	-	-
5780497	G	A	MRSN4605_05406	5	ampD	NP_253212.1	beta-lactamase expression regulator AmpD	snp	missense_variant	MODERATE	p.His2Tyr	2	2	0	-	-	-	-	-	-	-	-	-	-	-	-	-	-	-	-	-	-	-	+	-	-	-	-	-	+	-	-	-	-	-	-	-	-	-
5780418	TCCCCTTGCGGAC	T	MRSN4605_05406	5	ampD	NP_253212.1	beta-lactamase expression regulator AmpD	del	disruptive_inframe_deletion	MODERATE	p.Arg24_Asp28delinsHis	1	0	1	-	-	-	-	-	-	-	-	-	-	-	-	-	-	-	-	-	-	-	-	-	-	-	-	-	-	-	-	-	-	-	-	-	-	-
4388614	T	G,A	MRSN4605_04119	5	anr	NP_250235.1	transcriptional regulator Anr	snp	missense_variant	MODERATE	p.Leu23Gln	7	4	3	-	-	-	-	-	-	-	-	-	-	-	-	-	-	-	-	-	-	-	-	-	-	-	-	-	-	-	-	-	-	-	-	-	-	-
4388992	A	G	MRSN4605_04119	5	anr	NP_250235.1	transcriptional regulator Anr	snp	missense_variant	MODERATE	p.Asp149Gly	6	6	0	-	-	-	-	-	-	-	-	-	-	-	-	-	-	-	-	-	-	-	-	-	-	-	-	-	-	-	-	-	-	-	-	-	-	-
4389003	ATGC	A	MRSN4605_04119	5	anr	NP_250235.1	transcriptional regulator Anr	del	conservative_inframe_deletion	MODERATE	p.Leu156del	2	0	2	-	-	-	-	-	-	-	-	-	-	-	-	-	-	-	-	-	-	-	-	-	-	-	-	-	-	-	-	-	-	-	-	-	-	-
4389261	G	A	MRSN4605_04119	5	anr	NP_250235.1	transcriptional regulator Anr	snp	missense_variant	MODERATE	p.Gly239Ser	2	2	0	-	-	-	-	-	-	-	-	-	-	-	-	-	-	-	-	-	-	-	-	-	-	-	-	-	-	-	-	-	-	-	-	-	-	-
4388740	C	T	MRSN4605_04119	5	anr	NP_250235.1	transcriptional regulator Anr	snp	missense_variant	MODERATE	p.Ala65Val	1	1	0	-	-	-	-	-	-	-	-	-	-	-	-	-	-	-	-	-	-	-	-	-	-	-	-	-	-	-	-	-	-	-	-	-	-	-
6112474	AGCGCCGGGC	A	MRSN4605_05732	5	cbrB	NP_253414.1	two-component response regulator CbrB	del	disruptive_inframe_deletion	MODERATE	p.Arg233_Gly235del	17	17	0	+	+	+	+	+	+	+	+	+	+	+	-	-	+	+	-	-	-	-	-	-	-	-	-	-	-	-	-	-	-	-	-	+	-	-
6112443	C	A	MRSN4605_05732	5	cbrB	NP_253414.1	two-component response regulator CbrB	snp	missense_variant	MODERATE	p.Phe219Leu	6	6	0	-	-	-	-	-	-	-	-	-	-	-	-	-	-	-	-	-	-	-	-	+	+	+	+	+	-	-	+	-	-	-	-	-	-	-
6112455	A	T	MRSN4605_05732	5	cbrB	NP_253414.1	two-component response regulator CbrB	snp	missense_variant	MODERATE	p.Lys223Asn	5	5	0	-	-	-	-	-	-	-	-	-	-	-	-	-	-	-	-	-	-	-	-	-	-	-	-	-	-	-	-	-	-	-	-	-	-	-
6111941	A	G	MRSN4605_05732	5	cbrB	NP_253414.1	two-component response regulator CbrB	snp	missense_variant	MODERATE	p.Asp52Gly	2	2	0	-	-	-	-	-	-	-	-	-	-	-	-	-	-	-	-	-	-	-	+	-	-	-	-	-	+	-	-	-	-	-	-	-	-	-
6111938	G	A	MRSN4605_05732	5	cbrB	NP_253414.1	two-component response regulator CbrB	snp	missense_variant	MODERATE	p.Ser51Asn	1	1	0	-	-	-	-	-	-	-	-	-	-	-	-	-	-	-	-	-	-	-	-	-	-	-	-	-	-	-	-	-	-	-	-	-	-	-
6829206	T	TA	MRSN4605_06370	5	crc	NP_254019.1	catabolite repression control protein	ins	frameshift_variant&stop_gained	HIGH	p.Tyr132fs	1	1	0	-	-	-	-	-	-	-	-	-	-	-	-	-	-	-	-	-	-	-	-	-	-	-	-	-	-	-	+	-	-	-	-	-	-	-
6829531	AGCCGCGCTTCTCCCAGCATG	A	MRSN4605_06370	5	crc	NP_254019.1	catabolite repression control protein	del	frameshift_variant	HIGH	p.Gln240fs	1	0	1	-	-	-	-	-	-	-	-	-	-	-	-	-	-	-	-	-	-	-	-	-	-	-	-	-	-	-	-	-	-	-	-	-	-	-
6828843	A	C	MRSN4605_06370	5	crc	NP_254019.1	catabolite repression control protein	snp	missense_variant	MODERATE	p.Ile11Leu	6	6	0	-	-	-	-	-	-	-	-	-	+	+	-	-	-	-	-	-	-	-	-	-	-	-	-	-	-	-	-	-	-	-	-	+	-	-
6829252	G	A	MRSN4605_06370	5	crc	NP_254019.1	catabolite repression control protein	snp	missense_variant	MODERATE	p.Gly147Asp	1	1	0	-	-	-	-	-	-	-	-	-	-	-	-	-	-	-	-	-	-	-	-	-	-	-	-	-	-	-	-	-	-	-	-	-	-	-
6829333	A	T	MRSN4605_06370	5	crc	NP_254019.1	catabolite repression control protein	snp	missense_variant	MODERATE	p.Glu174Val	1	1	0	-	-	-	-	-	-	-	-	-	-	-	-	-	-	+	-	-	-	-	-	-	-	-	-	-	-	-	-	-	-	-	-	-	-	-
6479303	CATCGCCGACA	C	MRSN4605_06056	5	pilQ	NP_253727.1	Type 4 fimbrial biogenesis outer membrane protein PilQ precursor	del	frameshift_variant	HIGH	p.Leu547fs	8	0	8	-	-	-	-	-	-	-	-	-	-	-	-	-	-	-	-	-	-	-	-	-	-	-	-	-	-	-	-	-	-	-	-	-	-	-
6479266	T	A	MRSN4605_06056	5	pilQ	NP_253727.1	Type 4 fimbrial biogenesis outer membrane protein PilQ precursor	snp	stop_gained	HIGH	p.Lys563*	1	0	1	-	-	-	-	-	-	-	-	-	-	-	-	-	-	-	-	-	-	-	-	-	-	-	-	-	-	-	-	-	-	-	-	-	-	-
6479353	T	TGCCG	MRSN4605_06056	5	pilQ	NP_253727.1	Type 4 fimbrial biogenesis outer membrane protein PilQ precursor	ins	frameshift_variant	HIGH	p.Ile534fs	1	0	1	-	-	-	-	-	-	-	-	-	-	-	-	-	-	-	-	-	-	-	-	-	-	-	-	-	-	-	-	-	-	-	-	-	-	-
6480315	A	G	MRSN4605_06056	5	pilQ	NP_253727.1	Type 4 fimbrial biogenesis outer membrane protein PilQ precursor	snp	missense_variant	MODERATE	p.Val213Ala	2	2	0	-	-	-	-	-	-	-	-	-	-	-	-	-	-	-	-	-	-	-	+	-	-	-	-	-	+	-	-	-	-	-	-	-	-	-
6479994	A	G	MRSN4605_06056	5	pilQ	NP_253727.1	Type 4 fimbrial biogenesis outer membrane protein PilQ precursor	snp	missense_variant	MODERATE	p.Leu320Pro	1	0	1	-	-	-	-	-	-	-	-	-	-	-	-	-	-	-	-	-	-	-	-	-	-	-	-	-	-	-	-	-	-	-	-	-	-	-
5667754	C	T	MRSN4605_05300	4	ftsI	NP_253108.2	penicillin-binding protein 3	manual	missense variant	MODERATE	p.Cys504Arg	88	80	8	-	-	-	-	-	-	-	-	-	-	-	+	+	-	-	+	+	+	+	+	+	+	+	+	+	+	+	+	+	-	-	+	-	-	-
5667984	T	C	MRSN4605_05300	4	ftsI	NP_253108.1	penicillin-binding protein 3	snp	missense_variant	MODERATE	p.Asn427Ser	2	2	0	-	-	-	-	-	-	-	-	-	-	-	-	-	-	-	-	+	+	-	-	-	-	-	-	-	-	-	-	-	-	-	-	-	-	-
5668465	T	C	MRSN4605_05300	4	ftsI	NP_253108.1	penicillin-binding protein 3	snp	missense_variant	MODERATE	p.Thr267Ala	2	2	0	-	-	-	-	-	-	-	-	-	-	-	-	-	-	-	-	-	-	-	-	-	-	-	-	-	-	-	-	-	-	-	-	-	-	-
5667667	A	G	MRSN4605_05300	4	ftsI	NP_253108.1	penicillin-binding protein 3	snp	missense_variant	MODERATE	p.Phe533Leu	1	0	1	-	-	-	-	-	-	-	-	-	-	-	-	-	-	-	-	-	-	-	-	-	-	-	-	-	-	-	-	-	-	-	-	-	-	-
1113934	A	AC	MRSN4605_01058	4	mpl	NP_252709.1	UDP-N-acetylmuramate:L-alanyl-gamma-D-glutamyl-me so-diaminopimelate ligase	ins	frameshift_variant	HIGH	p.Met38fs	3	3	0	-	-	-	-	-	-	-	-	-	-	-	-	-	-	-	-	-	-	-	-	-	-	-	-	-	-	-	-	-	-	-	-	-	-	-
1114569	T	C	MRSN4605_01058	4	mpl	NP_252709.1	UDP-N-acetylmuramate:L-alanyl-gamma-D-glutamyl-me so-diaminopimelate ligase	snp	missense_variant	MODERATE	p.Trp247Arg	4	0	4	-	-	-	-	-	-	-	-	-	-	-	-	-	-	-	-	-	-	-	-	-	-	-	-	-	-	-	-	-	-	-	-	-	-	-
1114172	GACC	G	MRSN4605_01058	4	mpl	NP_252709.1	UDP-N-acetylmuramate:L-alanyl-gamma-D-glutamyl-me so-diaminopimelate ligase	del	disruptive_inframe_deletion	MODERATE	p.Thr118del	1	0	1	-	-	-	-	-	-	-	-	-	-	-	-	-	-	-	-	-	-	-	-	-	-	-	-	-	-	-	-	-	-	-	-	-	-	-
1114384	A	G	MRSN4605_01058	4	mpl	NP_252709.1	UDP-N-acetylmuramate:L-alanyl-gamma-D-glutamyl-me so-diaminopimelate ligase	snp	missense_variant	MODERATE	p.Asn185Ser	1	0	1	-	-	-	-	-	-	-	-	-	-	-	-	-	-	-	-	-	-	-	-	-	-	-	-	-	-	-	-	-	-	-	-	-	-	-
1265846	G	A	MRSN4605_01202	4	narX	NP_252567.1	two-component sensor NarX	snp	missense_variant	MODERATE	p.Arg392Cys	18	0	18	-	-	-	-	-	-	-	-	-	-	-	-	-	-	-	-	-	-	-	-	-	-	-	-	-	-	-	-	-	-	-	-	-	-	-
1265294	C	T	MRSN4605_01202	4	narX	NP_252567.1	two-component sensor NarX	snp	missense_variant	MODERATE	p.Gly576Arg	7	0	7	-	-	-	-	-	-	-	-	-	-	-	-	-	-	-	-	-	-	-	-	-	-	-	-	-	-	-	-	-	-	-	-	-	-	-
1265213	C	CTCG	MRSN4605_01202	4	narX	NP_252567.1	two-component sensor NarX	ins	conservative_inframe_insertion	MODERATE	p.Arg602dup	2	2	0	-	-	-	-	-	-	-	-	-	-	-	-	-	-	-	-	-	-	-	-	-	-	-	-	-	-	-	-	-	-	-	-	-	-	-
1265272	C	T	MRSN4605_01202	4	narX	NP_252567.1	two-component sensor NarX	snp	missense_variant	MODERATE	p.Arg583His	2	0	2	-	-	-	-	-	-	-	-	-	-	-	-	-	-	-	-	-	-	-	-	-	-	-	-	-	-	-	-	-	-	-	-	-	-	-
5625346	TGTCCACCGAGCTGTCCGGCAGGTCGATGGCG	T	MRSN4605_05260	4	warA	NP_253069.1	WarA	del	frameshift_variant	HIGH	p.Phe111fs	1	0	1	-	-	-	-	-	-	-	-	-	-	-	-	-	-	-	-	-	-	-	-	-	-	-	-	-	-	-	-	-	-	-	-	-	-	-
5625564	A	G	MRSN4605_05260	4	warA	NP_253069.1	WarA	snp	missense_variant	MODERATE	p.Leu49Pro	24	0	24	-	-	-	-	-	-	-	-	-	-	-	-	-	-	-	-	-	-	-	-	-	-	-	-	-	-	-	-	-	-	-	-	-	-	-
5625060	T	C	MRSN4605_05260	4	warA	NP_253069.1	WarA	snp	missense_variant	MODERATE	p.His217Arg	9	9	0	-	-	-	-	-	-	-	-	-	-	-	-	-	-	-	-	-	-	-	-	-	-	-	-	-	-	+	-	+	-	-	+	-	-	-
5625438	G	T	MRSN4605_05260	4	warA	NP_253069.1	WarA	snp	missense_variant	MODERATE	p.Ala91Asp	2	2	0	-	-	-	-	-	-	-	-	-	-	-	-	-	-	-	-	-	-	-	-	-	-	-	-	-	-	-	-	-	-	-	-	-	-	-
4276455	G	A	MRSN4605_04013	3	.	NP_250338.1	putative sulfate transporter	snp	missense_variant	MODERATE	p.Gly280Ser	4	4	0	-	-	-	-	-	-	-	-	-	-	-	-	-	-	-	-	-	-	-	-	-	-	-	-	-	-	-	-	-	-	-	-	-	-	-
4276681	G	C	MRSN4605_04013	3	.	NP_250338.1	putative sulfate transporter	snp	missense_variant	MODERATE	p.Gly355Ala	3	3	0	-	-	-	-	-	-	-	-	-	-	-	-	-	-	-	-	-	-	-	-	-	-	-	-	-	-	-	-	-	-	-	-	-	-	-
4276129	T	G	MRSN4605_04013	3	.	NP_250338.1	putative sulfate transporter	snp	missense_variant	MODERATE	p.Leu171Arg	2	2	0	-	-	-	-	-	-	-	-	-	-	-	-	-	-	-	-	-	-	-	-	-	-	-	-	-	-	-	-	-	-	-	-	-	-	-
5610830	T	C	MRSN4605_05248	3	bifA	NP_253057.1	BifA	snp	missense_variant	MODERATE	p.Ile485Thr	4	0	4	-	-	-	-	-	-	-	-	-	-	-	-	-	-	-	-	-	-	-	-	-	-	-	-	-	-	-	-	-	-	-	-	-	-	-
5611081	C	T	MRSN4605_05248	3	bifA	NP_253057.1	BifA	snp	missense_variant	MODERATE	p.Arg569Cys	1	0	1	-	-	-	-	-	-	-	-	-	-	-	-	-	-	-	-	-	-	-	-	-	-	-	-	-	-	-	-	-	-	-	-	-	-	-
5611111	G	A	MRSN4605_05248	3	bifA	NP_253057.1	BifA	snp	missense_variant	MODERATE	p.Asp579Asn	1	1	0	-	-	-	-	-	-	-	-	-	-	-	-	-	-	-	-	-	-	-	-	-	-	-	-	-	-	-	-	-	-	-	-	-	-	-
3938406	GAGCACCGACCAGA	G	MRSN4605_03623	3	cti	NP_250537.1	cis/trans isomerase	del	frameshift_variant	HIGH	p.Phe98fs	3	0	3	-	-	-	-	-	-	-	-	-	-	-	-	-	-	-	-	-	-	-	-	-	-	-	-	-	-	-	-	-	-	-	-	-	-	-
3938576	AGCAGGCGTG	A	MRSN4605_03623	3	cti	NP_250537.1	cis/trans isomerase	del	conservative_inframe_deletion	MODERATE	p.His43_Cys45del	31	0	31	-	-	-	-	-	-	-	-	-	-	-	-	-	-	-	-	-	-	-	-	-	-	-	-	-	-	-	-	-	-	-	-	-	-	-
3937643	C	T	MRSN4605_03623	3	cti	NP_250537.1	cis/trans isomerase	snp	missense_variant	MODERATE	p.Gly357Arg	6	6	0	-	-	-	-	-	-	-	-	-	-	-	-	-	-	-	-	-	-	-	-	+	+	+	+	+	-	-	+	-	-	-	-	-	-	-
6444415	AC	A	MRSN4605_06033	3	dipA	NP_253704.1	DipA	del	frameshift_variant	HIGH	p.Met107fs	6	0	6	-	-	-	-	-	-	-	-	-	-	-	-	-	-	-	-	-	-	-	-	-	-	-	-	-	-	-	-	-	-	-	-	-	-	-
6445915	A	C	MRSN4605_06033	3	dipA	NP_253704.1	DipA	snp	missense_variant	MODERATE	p.Thr606Pro	4	4	0	-	-	-	-	-	-	-	-	-	-	-	-	-	-	-	-	-	-	-	-	-	-	-	-	-	-	-	-	-	-	-	-	-	-	-
6444883	G	GACGCCCACA	MRSN4605_06033	3	dipA	NP_253704.1	DipA	ins	disruptive_inframe_insertion	MODERATE	p.His264_Ala266dup	1	0	1	-	-	-	-	-	-	-	-	-	-	-	-	-	-	-	-	-	-	-	-	-	-	-	-	-	-	-	-	-	-	-	-	-	-	-
4881400	C	T	MRSN4605_04571	3	fleQ	NP_249788.1	transcriptional regulator FleQ	snp	stop_gained	HIGH	p.Trp358*	1	0	1	-	-	-	-	-	-	-	-	-	-	-	-	-	-	-	-	-	-	-	-	-	-	-	-	-	-	-	-	-	-	-	-	-	-	-
4882123	G	A	MRSN4605_04571	3	fleQ	NP_249788.1	transcriptional regulator FleQ	snp	missense_variant	MODERATE	p.Ser117Phe	5	5	0	-	-	-	-	-	-	-	-	-	-	-	-	-	-	-	-	-	-	-	-	-	-	-	-	-	-	-	-	-	-	-	-	-	-	-
4881536	C	T	MRSN4605_04571	3	fleQ	NP_249788.1	transcriptional regulator FleQ	snp	missense_variant	MODERATE	p.Glu313Lys	3	0	3	-	-	-	-	-	-	-	-	-	-	-	-	-	-	-	-	-	-	-	-	-	-	-	-	-	-	-	-	-	-	-	-	-	-	-
5301999	G	A	MRSN4605_04961	3	mucA	NP_249454.1	anti-sigma factor MucA	snp	stop_gained	HIGH	p.Gln118*	1	0	1	-	-	-	-	-	-	-	-	-	-	-	-	-	-	-	-	-	-	-	-	-	-	-	-	-	-	-	-	-	-	-	-	-	-	-
5302148	GCAGCAGAGACCGC	G	MRSN4605_04961	3	mucA	NP_249454.1	anti-sigma factor MucA	del	frameshift_variant	HIGH	p.Ala64fs	1	0	1	-	-	-	-	-	-	-	-	-	-	-	-	-	-	-	-	-	-	-	-	-	-	-	-	-	-	-	-	-	-	-	-	-	-	-
5302322	A	T	MRSN4605_04961	3	mucA	NP_249454.1	anti-sigma factor MucA	snp	missense_variant	MODERATE	p.Leu10Gln	2	2	0	-	-	-	-	-	-	-	-	-	-	-	-	-	-	-	-	-	-	-	-	-	-	-	-	-	-	-	-	-	-	-	-	-	-	-
759198	G	GC	MRSN4605_00724	3	pchE	NP_252916.1	dihydroaeruginoic acid synthetase	ins	frameshift_variant	HIGH	p.Asp6fs	5	0	5	-	-	-	-	-	-	-	-	-	-	-	-	-	-	-	-	-	-	-	-	-	-	-	-	-	-	-	-	-	-	-	-	-	-	-
761153	T	C	MRSN4605_00724	3	pchE	NP_252916.1	dihydroaeruginoic acid synthetase	snp	missense_variant	MODERATE	p.Val655Ala	130	1	129	-	-	-	-	-	-	-	-	-	-	-	-	-	-	-	-	-	-	-	-	-	-	-	-	-	-	-	-	-	-	-	-	-	-	-
761801	G	A	MRSN4605_00724	3	pchE	NP_252916.1	dihydroaeruginoic acid synthetase	snp	missense_variant	MODERATE	p.Gly871Glu	1	1	0	-	-	-	-	-	-	-	-	-	-	-	-	-	-	-	-	-	-	-	-	-	-	-	-	-	-	-	-	-	-	-	-	-	-	-
3214800	GT	G	MRSN4605_03006	3	pvdI	NP_251092.1	pyoverdine peptide synthetase	del	frameshift_variant	HIGH	p.Ser36fs	1	1	0	-	-	-	-	-	-	-	-	-	-	-	-	-	-	-	-	-	-	-	-	-	-	-	-	-	-	-	-	-	-	-	-	-	-	-
3217618	G	GAAT	MRSN4605_03006	3	pvdI	NP_251092.1	pyoverdine peptide synthetase	ins	stop_gained&disruptive_inframe_insertion	HIGH	p.Glu974_Tyr975insTer	1	0	1	-	-	-	-	-	-	-	-	-	-	-	-	-	-	-	-	-	-	-	-	-	-	-	-	-	-	-	-	-	-	-	-	-	-	-
3223813	C	T	MRSN4605_03006	3	pvdI	NP_251092.1	pyoverdine peptide synthetase	snp	missense_variant	MODERATE	p.Arg3039Cys	2	2	0	-	-	-	-	-	-	-	-	-	-	-	-	-	-	-	-	-	-	-	-	-	-	-	-	-	-	-	-	-	-	-	-	-	-	-
482524	GGAACCGT	G	MRSN4605_00436	2	.		hypothetical protein	del	frameshift_variant	HIGH	p.His237fs	8	0	8	-	-	-	-	-	-	-	-	-	-	-	-	-	-	-	-	-	-	-	-	-	-	-	-	-	-	-	-	-	-	-	-	-	-	-
6003255	C	A	MRSN4605_05627	2	.		hypothetical protein	snp	stop_gained	HIGH	p.Glu285*	6	6	0	-	-	-	-	-	-	-	-	-	-	-	-	-	-	-	-	-	-	-	-	-	-	-	-	-	-	-	-	-	-	-	-	-	-	-
482792	C	CCG	MRSN4605_00436	2	.		hypothetical protein	ins	frameshift_variant	HIGH	p.Gly150fs	4	0	4	-	-	-	-	-	-	-	-	-	-	-	-	-	-	-	-	-	-	-	-	-	-	-	-	-	-	-	-	-	-	-	-	-	-	-
3005810	G	A	MRSN4605_02858	2	.	NP_251232.1	hypothetical protein	snp	stop_gained	HIGH	p.Trp444*	3	0	3	-	-	-	-	-	-	-	-	-	-	-	-	-	-	-	-	-	-	-	-	-	-	-	-	-	-	-	-	-	-	-	-	-	-	-
885125	CG	C	MRSN4605_00834	2	.		hypothetical protein	del	frameshift_variant	HIGH	p.Gly79fs	1	0	1	-	-	-	-	-	-	-	-	-	-	-	-	-	-	-	-	-	-	-	-	-	-	-	-	-	-	-	-	-	-	-	-	-	-	-
2763933	G	GC	MRSN4605_02623	2	.		hypothetical protein	ins	frameshift_variant	HIGH	p.Ala480fs	1	0	1	-	-	-	-	-	-	-	-	-	-	-	-	-	-	-	-	-	-	-	-	-	-	-	-	-	-	-	-	-	-	-	-	-	-	-
3139619	T	C	MRSN4605_02950	2	.	NP_251137.1	putative transcriptional regulator	snp	missense_variant	MODERATE	p.Val256Ala	8	0	8	-	-	-	-	-	-	-	-	-	-	-	-	-	-	-	-	-	-	-	-	-	-	-	-	-	-	-	-	-	-	-	-	-	-	-
6564804	C	T	MRSN4605_06130	2	.		hypothetical protein	snp	missense_variant	MODERATE	p.Ser444Asn	8	0	8	-	-	-	-	-	-	-	-	-	-	-	-	-	-	-	-	-	-	-	-	-	-	-	-	-	-	-	-	-	-	-	-	-	-	-
1455816	A	T	MRSN4605_01374	2	.	NP_252398.1	putative major facilitator superfamily (MFS) transporter	snp	missense_variant	MODERATE	p.Glu409Val	4	4	0	-	-	-	-	-	-	-	-	-	-	-	-	-	-	-	-	-	-	-	-	-	-	-	-	-	-	-	-	+	-	-	+	-	-	-
2764581	T	C	MRSN4605_02623	2	.		hypothetical protein	snp	missense_variant	MODERATE	p.Asn264Ser	2	2	0	-	-	-	-	-	-	-	-	-	-	-	-	-	-	-	-	-	-	-	-	-	-	-	-	-	-	-	-	-	-	-	-	-	-	-
3139325	T	C	MRSN4605_02950	2	.	NP_251137.1	putative transcriptional regulator	snp	missense_variant	MODERATE	p.Leu158Pro	2	0	2	-	-	-	-	-	-	-	-	-	-	-	-	-	-	-	-	-	-	-	-	-	-	-	-	-	-	-	-	-	-	-	-	-	-	-
4393336	G	A	MRSN4605_04125	2	.	NP_250229.1	putative flavin-containing monooxygenase	snp	missense_variant	MODERATE	p.Gly131Asp	2	0	2	-	-	-	-	-	-	-	-	-	-	-	-	-	-	-	-	-	-	-	-	-	-	-	-	-	-	-	-	-	-	-	-	-	-	-
6003458	A	G	MRSN4605_05627	2	.		hypothetical protein	snp	missense_variant	MODERATE	p.Leu217Pro	2	2	0	-	-	-	-	-	-	-	-	-	-	-	-	-	-	-	-	-	-	-	-	-	-	-	-	-	-	-	-	-	-	-	-	-	-	-
884986	A	G	MRSN4605_00834	2	.		hypothetical protein	snp	missense_variant	MODERATE	p.Glu30Gly	1	0	1	-	-	-	-	-	-	-	-	-	-	-	-	-	-	-	-	-	-	-	-	-	-	-	-	-	-	-	-	-	-	-	-	-	-	-
1456062	G	C	MRSN4605_01374	2	.	NP_252398.1	putative major facilitator superfamily (MFS) transporter	snp	missense_variant	MODERATE	p.Gly491Ala	1	1	0	-	-	-	-	-	-	-	-	-	-	-	-	-	-	-	-	-	-	-	-	-	-	-	-	-	-	-	-	-	-	-	-	-	-	-
1500626	C	T	MRSN4605_01414	2	.		hypothetical protein	snp	missense_variant	MODERATE	p.Ala97Val	1	0	1	-	-	-	-	-	-	-	-	-	-	-	-	-	-	-	-	-	-	-	-	-	-	-	-	-	-	-	-	-	-	-	-	-	-	-
1501293	C	G	MRSN4605_01414	2	.		hypothetical protein	snp	missense_variant	MODERATE	p.His319Gln	1	1	0	-	-	-	-	-	-	-	-	-	-	-	-	-	-	-	-	-	-	-	-	-	-	-	-	-	-	-	-	-	-	-	-	-	-	-
3005230	T	A	MRSN4605_02858	2	.	NP_251232.1	hypothetical protein	snp	missense_variant	MODERATE	p.Phe251Ile	1	0	1	-	-	-	-	-	-	-	-	-	-	-	-	-	-	-	-	-	-	-	-	-	-	-	-	-	-	-	-	-	-	-	-	-	-	-
3106444	C	T	MRSN4605_02939	2	.		hypothetical protein	snp	missense_variant	MODERATE	p.Ala2317Val	1	0	1	-	-	-	-	-	-	-	-	-	-	-	-	-	-	-	-	-	-	-	-	-	-	-	-	-	-	-	-	-	-	-	-	-	-	-
3110763	G	C	MRSN4605_02939	2	.		hypothetical protein	snp	missense_variant	MODERATE	p.Gly3757Arg	1	1	0	-	-	-	-	-	-	-	-	-	-	-	-	-	-	-	-	-	-	-	-	-	-	-	-	-	-	-	-	-	-	-	-	-	-	-
4393356	G	A	MRSN4605_04125	2	.	NP_250229.1	putative flavin-containing monooxygenase	snp	missense_variant	MODERATE	p.Ala138Thr	1	1	0	-	-	-	-	-	-	-	-	-	-	-	-	-	-	-	-	-	-	-	-	-	-	-	-	-	-	-	-	-	-	-	-	-	-	-
6565315	C	A	MRSN4605_06130	2	.		hypothetical protein	snp	missense_variant	MODERATE	p.Val274Leu	1	1	0	-	-	-	-	-	-	-	-	-	-	-	-	-	-	-	-	-	-	-	-	-	-	-	-	-	-	-	-	-	-	-	-	-	-	-
6858215	C	T	MRSN4605_06402	2	.	NP_254051.1	putative two-component response regulator	snp	missense_variant	MODERATE	p.Gly249Asp	1	1	0	-	-	-	-	-	-	-	-	-	-	-	-	-	-	-	-	-	-	-	-	-	-	-	-	-	-	-	-	-	-	-	-	-	-	-
6858765	C	G	MRSN4605_06402	2	.	NP_254051.1	putative two-component response regulator	snp	missense_variant	MODERATE	p.Glu66Gln	1	1	0	-	-	-	-	-	-	-	-	-	-	-	-	-	-	-	-	-	-	-	-	-	-	-	-	-	-	-	-	-	-	-	-	-	-	-
938281	A	G	MRSN4605_00902	2	bphP	NP_252806.1	bacterial phytochrome%2C BphP	snp	missense_variant	MODERATE	p.Leu487Pro	92	0	92	-	-	-	-	-	-	-	-	-	-	-	-	-	-	-	-	-	-	-	-	-	-	-	-	-	-	-	-	-	-	-	-	-	-	-
938789	A	G	MRSN4605_00902	2	bphP	NP_252806.1	bacterial phytochrome%2C BphP	snp	missense_variant	MODERATE	p.Ser318Pro	8	8	0	-	-	-	-	-	-	-	-	-	-	-	-	-	-	-	-	-	-	-	-	-	-	-	-	-	-	-	-	-	-	-	-	-	-	-
5626438	C	T	MRSN4605_05261	2	colS	NP_253070.1	two-component sensor ColS	snp	missense_variant	MODERATE	p.Arg211His	3	0	3	-	-	-	-	-	-	-	-	-	-	-	-	-	-	-	-	-	-	-	-	-	-	-	-	-	-	-	-	-	-	-	-	-	-	-
5626606	G	A	MRSN4605_05261	2	colS	NP_253070.1	two-component sensor ColS	snp	missense_variant	MODERATE	p.Ala155Val	3	0	3	-	-	-	-	-	-	-	-	-	-	-	-	-	-	-	-	-	-	-	-	-	-	-	-	-	-	-	-	-	-	-	-	-	-	-
2002096	C	T	MRSN4605_01871	2	cyaB	NP_251907.1	CyaB	snp	missense_variant	MODERATE	p.Gly381Asp	8	0	8	-	-	-	-	-	-	-	-	-	-	-	-	-	-	-	-	-	-	-	-	-	-	-	-	-	-	-	-	-	-	-	-	-	-	-
2002480	C	T	MRSN4605_01871	2	cyaB	NP_251907.1	CyaB	snp	missense_variant	MODERATE	p.Gly253Asp	5	0	5	-	-	-	-	-	-	-	-	-	-	-	-	-	-	-	-	-	-	-	-	-	-	-	-	-	-	-	-	-	-	-	-	-	-	-
6366905	AACTGTTCCGT	A	MRSN4605_05973	2	fimW	NP_253645.1	FimW	del	frameshift_variant	HIGH	p.Glu71fs	1	0	1	-	-	-	-	-	-	-	-	-	-	-	-	-	-	-	-	-	-	-	-	-	-	-	-	-	-	-	-	-	-	-	-	-	-	-
6367891	T	C	MRSN4605_05973	2	fimW	NP_253645.1	FimW	snp	missense_variant	MODERATE	p.Tyr400His	22	0	22	-	-	-	-	-	-	-	-	-	-	-	-	-	-	-	-	-	-	-	-	-	-	-	-	-	-	-	-	-	-	-	-	-	-	-
4572019	G	T	MRSN4605_04293	2	fleN	NP_250145.1	flagellar synthesis regulator FleN	snp	missense_variant	MODERATE	p.Arg257Ser	1	1	0	-	-	-	-	-	-	-	-	-	-	-	-	-	-	-	-	-	-	-	-	-	-	-	-	-	-	-	-	-	-	-	-	-	-	-
4572401	G	C	MRSN4605_04293	2	fleN	NP_250145.1	flagellar synthesis regulator FleN	snp	missense_variant	MODERATE	p.Ile129Met	1	1	0	-	-	-	-	-	-	-	-	-	-	-	-	-	-	-	+	-	-	-	-	-	-	-	-	-	-	-	-	-	-	-	-	-	-	-
4880168	CA	C	MRSN4605_04570	2	fleS	NP_249789.1	two-component sensor	del	frameshift_variant	HIGH	p.Val240fs	8	0	8	-	-	-	-	-	-	-	-	-	-	-	-	-	-	-	-	-	-	-	-	-	-	-	-	-	-	-	-	-	-	-	-	-	-	-
4879899	T	TCGCTGA	MRSN4605_04570	2	fleS	NP_249789.1	two-component sensor	ins	conservative_inframe_insertion	MODERATE	p.Val328_Ser329dup	6	0	6	-	-	-	-	-	-	-	-	-	-	-	-	-	-	-	-	-	-	-	-	-	-	-	-	-	-	-	-	-	-	-	-	-	-	-
1621394	G	C	MRSN4605_01526	2	fruA	NP_252250.1	phosphotransferase system transporter fructose-specific IIBC component%2C FruA	snp	missense_variant	MODERATE	p.Ala38Pro	6	6	0	-	-	-	-	-	-	-	-	-	-	-	-	-	-	-	-	-	-	-	-	+	+	+	+	+	-	-	+	-	-	-	-	-	-	-
1621702	GGCGTTGCAGCTCGCGGCGGGGCAACTGGGCTTC	G	MRSN4605_01526	2	fruA	NP_252250.1	phosphotransferase system transporter fructose-specific IIBC component%2C FruA	del	conservative_inframe_deletion	MODERATE	p.Leu144_Gln154del	5	0	5	-	-	-	-	-	-	-	-	-	-	-	-	-	-	-	-	-	-	-	-	-	-	-	-	-	-	-	-	-	-	-	-	-	-	-
3673589	T	A	MRSN4605_03391	2	fusA2	NP_250761.1	elongation factor G	snp	missense_variant	MODERATE	p.Glu178Asp	6	0	6	-	-	-	-	-	-	-	-	-	-	-	-	-	-	-	-	-	-	-	-	-	-	-	-	-	-	-	-	-	-	-	-	-	-	-
3673416	T	C	MRSN4605_03391	2	fusA2	NP_250761.1	elongation factor G	snp	missense_variant	MODERATE	p.Asn236Ser	1	1	0	-	-	-	-	-	-	-	-	-	-	-	-	-	-	-	-	-	-	-	-	-	-	-	-	-	-	-	-	-	-	-	-	-	-	-
2050614	G	A	MRSN4605_01921	2	gyrA	NP_251858.1	DNA gyrase subunit A	snp	missense_variant	MODERATE	p.Gly289Ser	3	3	0	-	-	-	-	-	-	-	-	-	-	-	-	-	-	-	-	-	-	-	-	-	-	-	-	-	-	-	-	-	-	-	-	-	-	-
2050008	A	G	MRSN4605_01921	2	gyrA	NP_251858.1	DNA gyrase subunit A	snp	missense_variant	MODERATE	p.Asn87Asp	1	0	1	-	-	-	-	-	-	-	-	-	-	-	-	-	-	-	-	-	-	-	-	-	-	-	-	-	-	-	-	-	-	-	-	-	-	-
6351551	C	T	MRSN4605_05959	2	hfq	NP_253631.1	Hfq	snp	missense_variant	MODERATE	p.Val62Met	1	0	1	-	-	-	-	-	-	-	-	-	-	-	-	-	-	-	-	-	-	-	-	-	-	-	-	-	-	-	-	-	-	-	-	-	-	-
6351592	T	C	MRSN4605_05959	2	hfq	NP_253631.1	Hfq	snp	missense_variant	MODERATE	p.Asn48Ser	1	1	0	-	+	-	-	-	-	-	-	-	-	-	-	-	-	-	-	-	-	-	-	-	-	-	-	-	-	-	-	-	-	-	-	-	-	-
5788562	GA	G	MRSN4605_05413	2	hxcS_2	NP_249378.1	HxcS	del	frameshift_variant	HIGH	p.Lys159fs	2	0	2	-	-	-	-	-	-	-	-	-	-	-	-	-	-	-	-	-	-	-	-	-	-	-	-	-	-	-	-	-	-	-	-	-	-	-
5789014	GGTGGGCAAGA	G	MRSN4605_05413	2	hxcS_2	NP_249378.1	HxcS	del	frameshift_variant	HIGH	p.Val309fs	2	2	0	-	-	-	-	-	-	-	-	-	-	-	-	-	-	-	-	-	-	-	-	-	-	-	-	-	-	-	-	-	-	-	-	-	-	-
7002822	GCGCCTGCAGCTCGAT	G	MRSN4605_06529	2	kinB	NP_254171.1	KinB	del	conservative_inframe_deletion	MODERATE	p.Leu489_Gln493del	4	0	4	-	-	-	-	-	-	-	-	-	-	-	-	-	-	-	-	-	-	-	-	-	-	-	-	-	-	-	-	-	-	-	-	-	-	-
7002643	C	G	MRSN4605_06529	2	kinB	NP_254171.1	KinB	snp	missense_variant	MODERATE	p.Arg426Gly	1	1	0	-	-	-	-	-	-	-	-	-	-	-	-	-	-	-	-	-	-	-	-	-	-	-	-	-	-	-	-	-	-	-	-	-	-	-
475194	C	T	MRSN4605_00432	2	mexA	NP_249116.1	Resistance-Nodulation-Cell Division (RND) multidrug efflux membrane fusion protein MexA precursor	snp	stop_gained	HIGH	p.Gln353*	1	0	1	-	-	-	-	-	-	-	-	-	-	-	-	-	-	-	-	-	-	-	-	-	-	-	-	-	-	-	-	-	-	-	-	-	-	-
474337	G	A	MRSN4605_00432	2	mexA	NP_249116.1	Resistance-Nodulation-Cell Division (RND) multidrug efflux membrane fusion protein MexA precursor	snp	missense_variant	MODERATE	p.Arg67His	1	0	1	-	-	-	-	-	-	-	-	-	-	-	-	-	-	-	-	-	-	-	-	-	-	-	-	-	-	-	-	-	-	-	-	-	-	-
5957236	C	A	MRSN4605_05592	2	mexC	NP_253289.1	Resistance-Nodulation-Cell Division (RND) multidrug efflux membrane fusion protein MexC precursor	snp	stop_gained	HIGH	p.Glu74*	1	1	0	-	-	-	-	-	-	-	-	-	-	-	-	-	-	-	-	-	-	-	-	-	-	-	-	-	-	-	-	-	-	-	-	-	-	-
5957348	CCG	C	MRSN4605_05592	2	mexC	NP_253289.1	Resistance-Nodulation-Cell Division (RND) multidrug efflux membrane fusion protein MexC precursor	del	frameshift_variant	HIGH	p.Arg36fs	1	1	0	-	-	-	-	-	-	-	-	-	-	-	-	-	-	-	-	-	-	-	-	-	-	-	-	-	-	-	-	-	-	-	-	-	-	-
1492443	TCCGGC	T	MRSN4605_01407	2	mexK	NP_252366.1	MexK	del	frameshift_variant	HIGH	p.Arg964fs	1	0	1	-	-	-	-	-	-	-	-	-	-	-	-	-	-	-	-	-	-	-	-	-	-	-	-	-	-	-	-	-	-	-	-	-	-	-
1491879	C	G	MRSN4605_01407	2	mexK	NP_252366.1	MexK	snp	missense_variant	MODERATE	p.Pro775Arg	1	1	0	-	-	-	-	-	-	-	-	-	-	-	-	-	-	-	-	-	-	-	-	-	-	-	-	-	-	-	-	-	-	-	-	-	-	-
3731459	G	T	MRSN4605_03441	2	mexX	NP_250709.1	Resistance-Nodulation-Cell Division (RND) multidrug efflux membrane fusion protein MexX precursor	snp	stop_gained	HIGH	p.Glu25*	4	4	0	-	-	-	-	-	-	-	-	-	-	-	-	-	-	-	-	-	-	-	-	-	-	-	-	-	-	-	-	-	-	-	-	-	-	-
3732426	G	A	MRSN4605_03441	2	mexX	NP_250709.1	Resistance-Nodulation-Cell Division (RND) multidrug efflux membrane fusion protein MexX precursor	snp	stop_gained	HIGH	p.Trp347*	2	2	0	-	-	-	-	-	-	-	-	-	-	-	-	-	-	-	-	-	-	-	-	-	-	-	-	-	-	-	-	-	-	-	-	-	-	-
3733357	CG	C	MRSN4605_03442	2	mexY	NP_250708.1	Resistance-Nodulation-Cell Division (RND) multidrug efflux transporter MexY	del	frameshift_variant	HIGH	p.Gly256fs	5	0	5	-	-	-	-	-	-	-	-	-	-	-	-	-	-	-	-	-	-	-	-	-	-	-	-	-	-	-	-	-	-	-	-	-	-	-
3735001	GA	G	MRSN4605_03442	2	mexY	NP_250708.1	Resistance-Nodulation-Cell Division (RND) multidrug efflux transporter MexY	del	frameshift_variant	HIGH	p.Thr804fs	1	0	1	-	-	-	-	-	-	-	-	-	-	-	-	-	-	-	-	-	-	-	-	-	-	-	-	-	-	-	-	-	-	-	-	-	-	-
5451703	C	T	MRSN4605_05115	2	migA	NP_249396.1	alpha-1%2C6-rhamnosyltransferase MigA	snp	stop_gained	HIGH	p.Gln242*	11	0	11	-	-	-	-	-	-	-	-	-	-	-	-	-	-	-	-	-	-	-	-	-	-	-	-	-	-	-	-	-	-	-	-	-	-	-
5451494	T	A	MRSN4605_05115	2	migA	NP_249396.1	alpha-1%2C6-rhamnosyltransferase MigA	snp	missense_variant	MODERATE	p.Leu172Gln	7	0	7	-	-	-	-	-	-	-	-	-	-	-	-	-	-	-	-	-	-	-	-	-	-	-	-	-	-	-	-	-	-	-	-	-	-	-
4192485	C	T	MRSN4605_03928	2	mucR	NP_250418.1	MucR	snp	missense_variant	MODERATE	p.Arg513Cys	11	0	11	-	-	-	-	-	-	-	-	-	-	-	-	-	-	-	-	-	-	-	-	-	-	-	-	-	-	-	-	-	-	-	-	-	-	-
4192365	C	T	MRSN4605_03928	2	mucR	NP_250418.1	MucR	snp	missense_variant	MODERATE	p.Arg473Cys	1	1	0	-	-	-	-	-	-	-	-	-	-	-	-	-	-	-	-	-	-	-	-	-	-	-	-	-	-	-	-	-	-	-	-	+	-	-
5557333	G	A	MRSN4605_05193	2	mvaT	NP_253005.1	transcriptional regulator MvaT%2C P16 subunit	snp	missense_variant	MODERATE	p.Gly98Ser	32	32	0	-	-	-	-	-	-	-	-	-	-	-	+	+	-	-	-	+	+	-	-	-	-	-	-	-	-	+	-	+	-	-	+	-	-	-
5557292	A	C	MRSN4605_05193	2	mvaT	NP_253005.1	transcriptional regulator MvaT%2C P16 subunit	snp	missense_variant	MODERATE	p.Gln84Pro	2	0	2	-	-	-	-	-	-	-	-	-	-	-	-	-	-	-	-	-	-	-	-	-	-	-	-	-	-	-	-	-	-	-	-	-	-	-
4983200	A	T	MRSN4605_04671	2	mvfR	NP_249694.1	Transcriptional regulator MvfR	snp	missense_variant	MODERATE	p.Asn76Tyr	3	3	0	-	-	-	-	-	-	-	-	-	-	-	-	-	-	-	-	-	-	-	-	-	-	-	-	-	-	-	-	-	-	-	-	-	+	+
4983672	G	A	MRSN4605_04671	2	mvfR	NP_249694.1	Transcriptional regulator MvfR	snp	missense_variant	MODERATE	p.Gly233Glu	3	0	3	-	-	-	-	-	-	-	-	-	-	-	-	-	-	-	-	-	-	-	-	-	-	-	-	-	-	-	-	-	-	-	-	-	-	-
6377221	G	A	MRSN4605_05979	2	parC	NP_253651.1	topoisomerase IV subunit A	snp	missense_variant	MODERATE	p.Pro119Ser	7	7	0	-	-	-	-	-	-	-	-	-	-	-	-	-	-	-	-	-	-	-	-	-	-	-	-	-	-	-	-	-	-	-	-	-	-	-
6377305	C	T	MRSN4605_05979	2	parC	NP_253651.1	topoisomerase IV subunit A	snp	missense_variant	MODERATE	p.Glu91Lys	1	0	1	-	-	-	-	-	-	-	-	-	-	-	-	-	-	-	-	-	-	-	-	-	-	-	-	-	-	-	-	-	-	-	-	-	-	-
5744342	A	C	MRSN4605_05377	2	roxS	NP_253184.1	RoxS	snp	missense_variant	MODERATE	p.Val265Gly	3	0	3	-	-	-	-	-	-	-	-	-	-	-	-	-	-	-	-	-	-	-	-	-	-	-	-	-	-	-	-	-	-	-	-	-	-	-
5744258	T	C	MRSN4605_05377	2	roxS	NP_253184.1	RoxS	snp	missense_variant	MODERATE	p.His293Arg	1	0	1	-	-	-	-	-	-	-	-	-	-	-	-	-	-	-	-	-	-	-	-	-	-	-	-	-	-	-	-	-	-	-	-	-	-	-
203520	A	G	MRSN4605_00176	2	siaA	NP_248862.1	SiaA	snp	missense_variant	MODERATE	p.Ile184Thr	5	5	0	-	-	-	-	-	-	-	-	-	-	-	-	-	-	-	-	-	-	-	-	-	-	-	-	-	-	-	-	-	-	-	-	-	-	-
203502	C	T	MRSN4605_00176	2	siaA	NP_248862.1	SiaA	snp	missense_variant	MODERATE	p.Gly190Asp	1	1	0	-	-	-	-	-	-	-	-	-	-	-	-	-	-	-	-	-	-	-	-	-	-	-	-	-	-	-	-	-	-	-	-	-	-	-
6421935	C	A	MRSN4605_06017	2	ssg	NP_253688.1	cell surface-sugar biosynthetic glycosyltransferase%2C Ssg	snp	stop_gained	HIGH	p.Glu231*	1	0	1	-	-	-	-	-	-	-	-	-	-	-	-	-	-	-	-	-	-	-	-	-	-	-	-	-	-	-	-	-	-	-	-	-	-	-
6422265	GTTCGCTGACCGTA	G	MRSN4605_06017	2	ssg	NP_253688.1	cell surface-sugar biosynthetic glycosyltransferase%2C Ssg	del	frameshift_variant	HIGH	p.Thr117fs	1	0	1	-	-	-	-	-	-	-	-	-	-	-	-	-	-	-	-	-	-	-	-	-	-	-	-	-	-	-	-	-	-	-	-	-	-	-
4343088	G	A	MRSN4605_04075	2	sucB	NP_250277.1	dihydrolipoamide succinyltransferase (E2 subunit)	snp	missense_variant	MODERATE	p.Ala52Val	8	0	8	-	-	-	-	-	-	-	-	-	-	-	-	-	-	-	-	-	-	-	-	-	-	-	-	-	-	-	-	-	-	-	-	-	-	-
4342863	T	C	MRSN4605_04075	2	sucB	NP_250277.1	dihydrolipoamide succinyltransferase (E2 subunit)	snp	missense_variant	MODERATE	p.Asp127Gly	1	1	0	-	-	-	-	-	-	-	-	-	-	-	-	-	-	-	-	-	-	-	-	-	-	-	-	-	-	-	-	-	-	-	-	-	-	-
2073288	G	A	MRSN4605_01940	2	wbpL	NP_251835.1	glycosyltransferase WbpL	snp	missense_variant	MODERATE	p.Met31Ile	1	0	1	-	-	-	-	-	-	-	-	-	-	-	-	-	-	-	-	-	-	-	-	-	-	-	-	-	-	-	-	-	-	-	-	-	-	-
2073298	A	T	MRSN4605_01940	2	wbpL	NP_251835.1	glycosyltransferase WbpL	snp	missense_variant	MODERATE	p.Asn35Tyr	1	0	1	-	-	-	-	-	-	-	-	-	-	-	-	-	-	-	-	-	-	-	-	-	-	-	-	-	-	-	-	-	-	-	-	-	-	-
6108650	T	C	MRSN4605_05730	1	.	YP_003933613.1	hypothetical protein	snp	start_lost	HIGH	p.Met1?	112	0	112	-	-	-	-	-	-	-	-	-	-	-	-	-	-	-	-	-	-	-	-	-	-	-	-	-	-	-	-	-	-	-	-	-	-	-
4750731	TCCGCACCACCTGG	T	MRSN4605_04448	1	.		hypothetical protein	del	frameshift_variant	HIGH	p.His181fs	31	0	31	-	-	-	-	-	-	-	-	-	-	-	-	-	-	-	-	-	-	-	-	-	-	-	-	-	-	-	-	-	-	-	-	-	-	-
1953376	AC	A	MRSN4605_01820	1	.	NP_251952.1	putative peptidyl-prolyl cis-trans isomerase%2C FkbP-type	del	frameshift_variant	HIGH	p.Pro26fs	29	29	0	+	+	-	+	+	+	-	+	+	+	+	-	-	+	+	-	-	-	-	-	-	-	-	-	-	-	-	-	-	-	-	-	+	-	-
5892674	G	T	MRSN4605_05533	1	.	NP_253233.1	hypothetical protein	snp	stop_gained	HIGH	p.Ser112*	21	0	21	-	-	-	-	-	-	-	-	-	-	-	-	-	-	-	-	-	-	-	-	-	-	-	-	-	-	-	-	-	-	-	-	-	-	-
1368944	C	A	MRSN4605_01302	1	.	NP_252465.1	putative transcriptional regulator	snp	stop_gained	HIGH	p.Glu266*	17	17	0	+	+	+	+	+	+	+	+	+	+	+	-	-	+	+	-	-	-	-	-	-	-	-	-	-	-	-	-	-	-	-	-	+	-	-
4443937	G	GC	MRSN4605_04170	1	.	NP_250038.1	putative transcriptional regulator	ins	frameshift_variant	HIGH	p.Ser151fs	17	17	0	+	+	+	+	+	+	+	+	+	+	+	-	-	+	+	-	-	-	-	-	-	-	-	-	-	-	-	-	-	-	-	-	+	-	-
2064448	TG	T,TGG	MRSN4605_01931	1	.		hypothetical protein	del	frameshift_variant	HIGH	p.Gly84fs	15	3	12	-	-	-	-	-	-	-	-	-	-	-	-	-	-	-	-	-	-	-	-	-	-	-	-	-	-	-	-	-	-	-	-	-	-	-
5936093	T	TG	MRSN4605_05576	1	.	NP_253274.1	hypothetical protein	ins	frameshift_variant	HIGH	p.Glu22fs	13	13	0	-	-	-	-	-	-	-	-	-	-	-	-	-	-	-	-	-	-	-	-	-	-	-	-	-	-	-	-	-	-	-	-	-	-	-
2397692	AGT	A	MRSN4605_02251	1	.		hypothetical protein	del	frameshift_variant&stop_lost&splice_region_variant	HIGH	p.Ter141fs	9	0	9	-	-	-	-	-	-	-	-	-	-	-	-	-	-	-	-	-	-	-	-	-	-	-	-	-	-	-	-	-	-	-	-	-	-	-
1983658	A	G	MRSN4605_01850	1	.	NP_251928.1	putative lipase	snp	start_lost	HIGH	p.Met1?	8	8	0	-	-	-	-	-	-	-	-	-	-	-	-	-	-	-	-	-	-	-	-	-	-	-	-	-	-	-	-	-	+	+	-	-	+	+
523382	G	T	MRSN4605_00468	1	.		hypothetical protein	snp	start_lost	HIGH	p.Val1?	7	0	7	-	-	-	-	-	-	-	-	-	-	-	-	-	-	-	-	-	-	-	-	-	-	-	-	-	-	-	-	-	-	-	-	-	-	-
3476407	CAGTGCATCGAAGACGA	C	MRSN4605_03216	1	.	NP_249678.1	hypothetical protein	del	frameshift_variant	HIGH	p.Phe112fs	6	0	6	-	-	-	-	-	-	-	-	-	-	-	-	-	-	-	-	-	-	-	-	-	-	-	-	-	-	-	-	-	-	-	-	-	-	-
396651	TG	T	MRSN4605_00356	1	.	NP_249043.1	putative transporter	del	frameshift_variant	HIGH	p.Gln243fs	5	0	5	-	-	-	-	-	-	-	-	-	-	-	-	-	-	-	-	-	-	-	-	-	-	-	-	-	-	-	-	-	-	-	-	-	-	-
3378027	C	T	MRSN4605_03116	1	.	NP_250981.1	putative glucose-sensitive porin	snp	stop_gained	HIGH	p.Gln256*	3	0	3	-	-	-	-	-	-	-	-	-	-	-	-	-	-	-	-	-	-	-	-	-	-	-	-	-	-	-	-	-	-	-	-	-	-	-
3559393	C	CAT	MRSN4605_03292	1	.	NP_250854.1	putative glycosyl hydrolase	ins	frameshift_variant	HIGH	p.Val283fs	3	0	3	-	-	-	-	-	-	-	-	-	-	-	-	-	-	-	-	-	-	-	-	-	-	-	-	-	-	-	-	-	-	-	-	-	-	-
2147295	G	A	MRSN4605_02011	1	.		hypothetical protein	snp	stop_gained	HIGH	p.Trp541*	2	0	2	-	-	-	-	-	-	-	-	-	-	-	-	-	-	-	-	-	-	-	-	-	-	-	-	-	-	-	-	-	-	-	-	-	-	-
2569358	G	A	MRSN4605_02443	1	.		hypothetical protein	snp	stop_gained	HIGH	p.Trp150*	2	2	0	-	-	-	-	-	-	-	-	-	-	-	-	-	-	-	-	-	-	-	-	-	-	-	-	-	-	-	-	-	-	-	-	-	-	-
3553595	CGG	GGGT	MRSN4605_03287	1	.		hypothetical protein	complex	frameshift_variant&synonymous_variant	HIGH	p.Pro119fs	2	2	0	-	-	-	-	-	-	-	-	-	-	-	-	-	-	-	-	-	-	-	-	-	-	-	-	-	-	-	-	-	-	-	-	-	-	-
3881017	ACTCAGATTGCC	A	MRSN4605_03573	1	.		hypothetical protein	del	frameshift_variant	HIGH	p.Gln4fs	2	0	2	-	-	-	-	-	-	-	-	-	-	-	-	-	-	-	-	-	-	-	-	-	-	-	-	-	-	-	-	-	-	-	-	-	-	-
6666104	G	T	MRSN4605_06220	1	.	NP_253875.1	putative 3-hydroxyacyl-CoA dehydrogenase	snp	stop_gained	HIGH	p.Cys25*	2	2	0	-	-	-	-	-	-	-	-	-	-	-	-	-	-	-	-	-	-	-	-	-	-	-	-	-	-	-	-	-	-	-	-	-	-	-
894182	C	CG	MRSN4605_00850	1	.		hypothetical protein	ins	frameshift_variant	HIGH	p.Ala108fs	1	1	0	-	-	-	-	-	-	-	-	-	-	-	-	-	-	-	-	-	-	-	-	-	-	-	-	-	-	-	-	-	-	-	-	-	-	-
1048065	G	GC	MRSN4605_01003	1	.		hypothetical protein	ins	frameshift_variant	HIGH	p.Pro658fs	1	0	1	-	-	-	-	-	-	-	-	-	-	-	-	-	-	-	-	-	-	-	-	-	-	-	-	-	-	-	-	-	-	-	-	-	-	-
1388388	G	GC	MRSN4605_01318	1	.	NP_252453.1	hypothetical protein	ins	frameshift_variant	HIGH	p.Asp237fs	1	0	1	-	-	-	-	-	-	-	-	-	-	-	-	-	-	-	-	-	-	-	-	-	-	-	-	-	-	-	-	-	-	-	-	-	-	-
2616174	C	T	MRSN4605_02494	1	.		hypothetical protein	snp	stop_gained	HIGH	p.Gln456*	1	0	1	-	-	-	-	-	-	-	-	-	-	-	-	-	-	-	-	-	-	-	-	-	-	-	-	-	-	-	-	-	-	-	-	-	-	-
3453072	G	T	MRSN4605_03183	1	.		hypothetical protein	snp	stop_gained	HIGH	p.Glu222*	1	1	0	-	-	-	-	-	-	-	-	-	-	-	-	-	-	-	-	-	-	-	-	-	-	-	-	-	-	-	-	-	-	-	-	-	-	-
4183407	GC	G	MRSN4605_03920	1	.		hypothetical protein	del	frameshift_variant	HIGH	p.Gly261fs	1	1	0	-	-	-	-	-	-	-	-	-	-	-	-	-	-	-	-	-	-	-	-	-	-	-	-	-	-	-	-	-	-	-	-	-	-	-
4268941	C	T	MRSN4605_04006	1	.	NP_250345.1	putative aminotransferase	snp	stop_gained	HIGH	p.Trp263*	1	0	1	-	-	-	-	-	-	-	-	-	-	-	-	-	-	-	-	-	-	-	-	-	-	-	-	-	-	-	-	-	-	-	-	-	-	-
4280235	G	A	MRSN4605_04016	1	.	NP_250335.1	hypothetical protein	snp	stop_gained	HIGH	p.Gln90*	1	0	1	-	-	-	-	-	-	-	-	-	-	-	-	-	-	-	-	-	-	-	-	-	-	-	-	-	-	-	-	-	-	-	-	-	-	-
4563039	C	T	MRSN4605_04284	1	.		hypothetical protein	snp	stop_gained	HIGH	p.Trp188*	1	1	0	-	-	-	-	-	-	-	-	-	-	-	-	-	-	-	-	-	-	-	-	-	-	-	-	-	-	-	-	-	-	-	-	-	-	-
4928407	G	A	MRSN4605_04616	1	.	NP_249744.1	hypothetical protein	snp	stop_gained	HIGH	p.Gln127*	1	0	1	-	-	-	-	-	-	-	-	-	-	-	-	-	-	-	-	-	-	-	-	-	-	-	-	-	-	-	-	-	-	-	-	-	-	-
5032667	CCCGCCGAGCG	C	MRSN4605_04725	1	.	NP_249641.1	putative arsenate reductase	del	frameshift_variant	HIGH	p.Ala41fs	1	1	0	-	-	-	-	-	-	-	-	-	-	-	-	+	-	-	-	-	-	-	-	-	-	-	-	-	-	-	-	-	-	-	-	-	-	-
6179404	G	GC	MRSN4605_05794	1	.	NP_253474.1	putative short-chain dehydrogenase	ins	frameshift_variant	HIGH	p.Glu132fs	1	0	1	-	-	-	-	-	-	-	-	-	-	-	-	-	-	-	-	-	-	-	-	-	-	-	-	-	-	-	-	-	-	-	-	-	-	-
6618248	A	AT	MRSN4605_06176	1	.		hypothetical protein	ins	frameshift_variant	HIGH	p.Ala415fs	1	1	0	-	-	-	-	-	-	-	-	-	-	-	-	-	-	-	-	-	-	-	-	-	-	-	-	-	-	-	-	-	-	-	-	-	-	-
6709270	T	TGGGTATA	MRSN4605_06261	1	.		hypothetical protein	ins	frameshift_variant	HIGH	p.Gln26fs	1	1	0	-	-	-	-	-	-	-	-	-	-	-	-	-	-	-	-	-	-	-	-	-	-	-	-	-	-	-	-	-	-	-	-	-	-	-
6837253	TGCGGTGGTTCCGC	T	MRSN4605_06380	1	.	NP_254029.1	putative transcriptional regulator	del	frameshift_variant	HIGH	p.Gly162fs	1	0	1	-	-	-	-	-	-	-	-	-	-	-	-	-	-	-	-	-	-	-	-	-	-	-	-	-	-	-	-	-	-	-	-	-	-	-
6843866	CTT	C	MRSN4605_06386	1	.	NP_254035.1	putative DNA-binding protein	del	frameshift_variant	HIGH	p.Lys83fs	1	1	0	-	-	-	-	-	-	-	-	-	-	-	-	-	-	-	+	-	-	-	-	-	-	-	-	-	-	-	-	-	-	-	-	-	-	-
1731090	C	T	MRSN4605_01611	1	.	NP_252148.1	putative transcriptional regulator	snp	missense_variant	MODERATE	p.Pro69Ser	129	0	129	-	-	-	-	-	-	-	-	-	-	-	-	-	-	-	-	-	-	-	-	-	-	-	-	-	-	-	-	-	-	-	-	-	-	-
815837	C	A	MRSN4605_00763	1	.	NP_252876.1	putative major facilitator superfamily (MFS) transporter	snp	missense_variant	MODERATE	p.Trp241Leu	116	0	116	-	-	-	-	-	-	-	-	-	-	-	-	-	-	-	-	-	-	-	-	-	-	-	-	-	-	-	-	-	-	-	-	-	-	-
1875153	T	G	MRSN4605_01752	1	.	NP_252013.1	hypothetical protein	snp	missense_variant	MODERATE	p.Asp135Ala	116	0	116	-	-	-	-	-	-	-	-	-	-	-	-	-	-	-	-	-	-	-	-	-	-	-	-	-	-	-	-	-	-	-	-	-	-	-
1968919	G	A	MRSN4605_01835	1	.	NP_251943.1	putative permease of ABC transporter	manual	missense_variant	MODERATE	p.His192Arg	80	80	0	-	-	-	-	-	-	-	-	-	-	-	+	+	-	-	+	+	+	+	+	+	+	+	+	+	+	+	+	+	-	-	+	-	-	-
6107890	G	C	MRSN4605_05729	1	.	NP_253412.1	putative aminoacyl-transfer RNA synthetase (class I)	manual	missense_variant	MODERATE	p.Gly65Arg	80	80	0	-	-	-	-	-	-	-	-	-	-	-	+	+	-	-	+	+	+	+	+	+	+	+	+	+	+	+	+	+	-	-	+	-	-	-
1071891	T	C	MRSN4605_01018	1	.		hypothetical protein	snp	missense_variant	MODERATE	p.Asp153Gly	65	0	65	-	-	-	-	-	-	-	-	-	-	-	-	-	-	-	-	-	-	-	-	-	-	-	-	-	-	-	-	-	-	-	-	-	-	-
6310515	C	G	MRSN4605_05921	1	.		Delta(1)-pyrroline-2-carboxylate reductase	snp	missense_variant	MODERATE	p.Gly156Arg	51	0	51	-	-	-	-	-	-	-	-	-	-	-	-	-	-	-	-	-	-	-	-	-	-	-	-	-	-	-	-	-	-	-	-	-	-	-
1224858	G	A	MRSN4605_01158	1	.	NP_252608.1	hypothetical protein	snp	missense_variant	MODERATE	p.Gly428Asp	31	0	31	-	-	-	-	-	-	-	-	-	-	-	-	-	-	-	-	-	-	-	-	-	-	-	-	-	-	-	-	-	-	-	-	-	-	-
5235093	T	A	MRSN4605_04900	1	.		hypothetical protein	snp	missense_variant	MODERATE	p.Ile164Asn	31	0	31	-	-	-	-	-	-	-	-	-	-	-	-	-	-	-	-	-	-	-	-	-	-	-	-	-	-	-	-	-	-	-	-	-	-	-
6261427	G	A	MRSN4605_05871	1	.		hypothetical protein	snp	missense_variant	MODERATE	p.Ala139Thr	24	0	24	-	-	-	-	-	-	-	-	-	-	-	-	-	-	-	-	-	-	-	-	-	-	-	-	-	-	-	-	-	-	-	-	-	-	-
6590496	G	T	MRSN4605_06152	1	.		hypothetical protein	snp	missense_variant	MODERATE	p.Trp474Leu	24	0	24	-	-	-	-	-	-	-	-	-	-	-	-	-	-	-	-	-	-	-	-	-	-	-	-	-	-	-	-	-	-	-	-	-	-	-
3548790	G	A	MRSN4605_03279	1	.	NP_250867.1	putative sensor/response regulator hybrid	snp	missense_variant	MODERATE	p.Leu171Phe	23	0	23	-	-	-	-	-	-	-	-	-	-	-	-	-	-	-	-	-	-	-	-	-	-	-	-	-	-	-	-	-	-	-	-	-	-	-
1171902	G	A	MRSN4605_01116	1	.	NP_252650.1	putative ATP-dependent helicase	snp	missense_variant	MODERATE	p.Ala637Thr	21	0	21	-	-	-	-	-	-	-	-	-	-	-	-	-	-	-	-	-	-	-	-	-	-	-	-	-	-	-	-	-	-	-	-	-	-	-
1877290	C	T	MRSN4605_01754	1	.	NP_252011.1	putative transcriptional regulator	snp	missense_variant	MODERATE	p.Gly105Ser	21	0	21	-	-	-	-	-	-	-	-	-	-	-	-	-	-	-	-	-	-	-	-	-	-	-	-	-	-	-	-	-	-	-	-	-	-	-
3203852	GGCGCGGCGA	G	MRSN4605_02993	1	.	NP_251104.1	L-sorbosone dehydrogenase	del	disruptive_inframe_deletion	MODERATE	p.Gly230_Ile233delinsVal	21	0	21	-	-	-	-	-	-	-	-	-	-	-	-	-	-	-	-	-	-	-	-	-	-	-	-	-	-	-	-	-	-	-	-	-	-	-
3570466	G	T	MRSN4605_03300	1	.	NP_250846.1	hypothetical protein	snp	missense_variant	MODERATE	p.Ala38Ser	21	0	21	-	-	-	-	-	-	-	-	-	-	-	-	-	-	-	-	-	-	-	-	-	-	-	-	-	-	-	-	-	-	-	-	-	-	-
5705659	G	A	MRSN4605_05341	1	.	NP_253148.1	hypothetical protein	snp	missense_variant	MODERATE	p.Gly153Ser	18	0	18	-	-	-	-	-	-	-	-	-	-	-	-	-	-	-	-	-	-	-	-	-	-	-	-	-	-	-	-	-	-	-	-	-	-	-
1384555	C	A	MRSN4605_01314	1	.	NP_252457.1	putative metallo-oxidoreductase	snp	missense_variant	MODERATE	p.Pro411Gln	17	17	0	+	+	+	+	+	+	+	+	+	+	+	-	-	+	+	-	-	-	-	-	-	-	-	-	-	-	-	-	-	-	-	-	+	-	-
3075405	G	A	MRSN4605_02917	1	.	NP_251174.1	hypothetical protein	snp	missense_variant	MODERATE	p.Arg139His	14	14	0	-	-	-	-	-	-	-	-	-	-	-	-	-	-	-	-	-	-	-	-	-	-	-	-	-	-	-	-	-	-	-	-	-	-	-
3706531	C	T	MRSN4605_03416	1	.		hypothetical protein	snp	missense_variant	MODERATE	p.Ala34Val	13	13	0	-	-	-	-	-	-	-	-	-	-	-	-	-	-	-	-	-	-	-	-	-	-	-	-	-	-	-	-	-	-	-	-	-	-	-
4148425	G	C	MRSN4605_03884	1	.	NP_250460.1	hypothetical protein	snp	missense_variant	MODERATE	p.Gln194His	13	13	0	-	-	-	-	-	-	-	-	-	-	-	-	-	-	-	-	-	-	-	-	-	-	-	-	-	-	-	-	-	-	-	-	-	-	-
4227538	C	T	MRSN4605_03971	1	.	NP_250375.1	1%2C2-dihydroxy-3-keto-5-methylthiopentene dioxygenase MtnD	snp	missense_variant	MODERATE	p.Asp131Asn	13	13	0	-	-	-	-	-	-	-	-	-	-	-	-	-	-	-	-	-	-	-	-	-	-	-	-	-	-	-	-	-	-	-	-	-	-	-
6733638	T	A	MRSN4605_06281	1	.		hypothetical protein	snp	missense_variant	MODERATE	p.Thr255Ser	12	12	0	-	-	-	-	-	-	-	-	-	-	-	-	-	-	-	-	-	-	-	-	-	-	-	-	-	-	-	-	-	-	-	-	-	-	-
3516771	T	C	MRSN4605_03248	1	.	NP_250903.1	putative porin	snp	missense_variant	MODERATE	p.Asp235Gly	11	0	11	-	-	-	-	-	-	-	-	-	-	-	-	-	-	-	-	-	-	-	-	-	-	-	-	-	-	-	-	-	-	-	-	-	-	-
5052401	A	C	MRSN4605_04746	1	.	NP_249621.1	two-component sensor	snp	missense_variant	MODERATE	p.Leu350Arg	11	0	11	-	-	-	-	-	-	-	-	-	-	-	-	-	-	-	-	-	-	-	-	-	-	-	-	-	-	-	-	-	-	-	-	-	-	-
7036437	C	G	MRSN4605_06562	1	.		hypothetical protein	snp	missense_variant	MODERATE	p.His54Gln	11	0	11	-	-	-	-	-	-	-	-	-	-	-	-	-	-	-	-	-	-	-	-	-	-	-	-	-	-	-	-	-	-	-	-	-	-	-
3597773	A	G	MRSN4605_03326	1	.	NP_250823.1	Cyclic-guanylate-specific phosphodiesterase	snp	missense_variant	MODERATE	p.Ile196Thr	10	0	10	-	-	-	-	-	-	-	-	-	-	-	-	-	-	-	-	-	-	-	-	-	-	-	-	-	-	-	-	-	-	-	-	-	-	-
4743951	T	C	MRSN4605_04443	1	.	NP_249915.1	putative NAD(P)H dehydrogenase	snp	missense_variant	MODERATE	p.Asn74Ser	10	0	10	-	-	-	-	-	-	-	-	-	-	-	-	-	-	-	-	-	-	-	-	-	-	-	-	-	-	-	-	-	-	-	-	-	-	-
5573691	G	T	MRSN4605_05209	1	.	NP_253020.1	putative enoyl-CoA hydratase/isomerase	snp	missense_variant	MODERATE	p.Ser164Arg	10	0	10	-	-	-	-	-	-	-	-	-	-	-	-	-	-	-	-	-	-	-	-	-	-	-	-	-	-	-	-	-	-	-	-	-	-	-
244852	G	T	MRSN4605_00216	1	.	NP_248907.1	malonate transporter MadM	snp	missense_variant	MODERATE	p.Val90Phe	8	0	8	-	-	-	-	-	-	-	-	-	-	-	-	-	-	-	-	-	-	-	-	-	-	-	-	-	-	-	-	-	-	-	-	-	-	-
845067	C	G	MRSN4605_00792	1	.	NP_251623.1	putative major facilitator superfamily (MFS) transporter	snp	missense_variant	MODERATE	p.Gly400Arg	8	7	1	-	-	-	-	-	-	-	-	-	-	-	-	-	-	-	-	-	-	-	-	-	-	-	-	-	-	-	-	-	-	-	-	-	-	-
1876253	C	T	MRSN4605_01753	1	.		hypothetical protein	snp	missense_variant	MODERATE	p.Ala129Val	8	0	8	-	-	-	-	-	-	-	-	-	-	-	-	-	-	-	-	-	-	-	-	-	-	-	-	-	-	-	-	-	-	-	-	-	-	-
2581429	C	T	MRSN4605_02452	1	.		hypothetical protein	snp	missense_variant	MODERATE	p.Ala85Val	8	8	0	-	-	-	-	-	-	-	-	-	-	-	-	-	-	-	-	-	-	-	-	-	-	-	-	-	-	-	-	-	+	+	-	-	+	+
4536890	A	ATGCTCC	MRSN4605_04255	1	.	NP_250182.1	putative transporter	ins	disruptive_inframe_insertion	MODERATE	p.Gln398_Glu399dup	8	0	8	-	-	-	-	-	-	-	-	-	-	-	-	-	-	-	-	-	-	-	-	-	-	-	-	-	-	-	-	-	-	-	-	-	-	-
5023991	G	A	MRSN4605_04714	1	.		hypothetical protein	snp	missense_variant	MODERATE	p.Arg22Cys	8	0	8	-	-	-	-	-	-	-	-	-	-	-	-	-	-	-	-	-	-	-	-	-	-	-	-	-	-	-	-	-	-	-	-	-	-	-
6213606	T	C	MRSN4605_05829	1	.		hypothetical protein	snp	missense_variant	MODERATE	p.Thr22Ala	8	0	8	-	-	-	-	-	-	-	-	-	-	-	-	-	-	-	-	-	-	-	-	-	-	-	-	-	-	-	-	-	-	-	-	-	-	-
6526370	G	A	MRSN4605_06098	1	.		hypothetical protein	snp	missense_variant	MODERATE	p.Arg74His	8	0	8	-	-	-	-	-	-	-	-	-	-	-	-	-	-	-	-	-	-	-	-	-	-	-	-	-	-	-	-	-	-	-	-	-	-	-
6961413	A	G	MRSN4605_06491	1	.	NP_254132.1	putative coenzyme A transferase	snp	missense_variant	MODERATE	p.Asp299Gly	8	0	8	-	-	-	-	-	-	-	-	-	-	-	-	-	-	-	-	-	-	-	-	-	-	-	-	-	-	-	-	-	-	-	-	-	-	-
257740	G	T	MRSN4605_00227	1	.	NP_248918.1	putative CoA transferase%2C subunit B	snp	missense_variant	MODERATE	p.Arg223Leu	7	7	0	-	-	-	-	-	-	-	-	-	-	-	-	-	-	-	-	-	-	-	-	-	-	-	-	-	-	-	-	-	-	-	-	-	-	-
1118208	C	T	MRSN4605_01062	1	.		hypothetical protein	snp	missense_variant	MODERATE	p.Arg114His	7	0	7	-	-	-	-	-	-	-	-	-	-	-	-	-	-	-	-	-	-	-	-	-	-	-	-	-	-	-	-	-	-	-	-	-	-	-
1966713	T	G	MRSN4605_01832	1	.	NP_251946.1	putative oxidoreductase	snp	missense_variant	MODERATE	p.Met230Arg	6	6	0	-	-	-	-	-	-	-	-	-	-	-	-	-	-	-	-	-	-	-	-	-	-	-	-	-	-	-	-	-	-	-	-	-	-	-
2394575	G	A	MRSN4605_02248	1	.	NP_251587.1	putative transcriptional regulator	snp	missense_variant	MODERATE	p.Ser254Asn	6	6	0	-	-	-	-	-	-	-	-	-	+	+	-	-	-	-	-	-	-	-	-	-	-	-	-	-	-	-	-	-	-	-	-	+	-	-
2462720	T	A	MRSN4605_02316	1	.	NP_251521.1	hypothetical protein	snp	missense_variant	MODERATE	p.Gln61Leu	6	0	6	-	-	-	-	-	-	-	-	-	-	-	-	-	-	-	-	-	-	-	-	-	-	-	-	-	-	-	-	-	-	-	-	-	-	-
2587833	G	T	MRSN4605_02463	1	.	NP_252556.1	putative DNA invertase	snp	missense_variant	MODERATE	p.Ala145Ser	6	6	0	-	-	-	-	-	-	-	-	-	+	+	-	-	-	-	-	-	-	-	-	-	-	-	-	-	-	-	-	-	-	-	-	+	-	-
2967360	C	T	MRSN4605_02822	1	.		hypothetical protein	snp	missense_variant	MODERATE	p.Ala147Val	6	0	6	-	-	-	-	-	-	-	-	-	-	-	-	-	-	-	-	-	-	-	-	-	-	-	-	-	-	-	-	-	-	-	-	-	-	-
3665178	T	C	MRSN4605_03387	1	.		hypothetical protein	snp	missense_variant	MODERATE	p.Phe61Leu	6	0	6	-	-	-	-	-	-	-	-	-	-	-	-	-	-	-	-	-	-	-	-	-	-	-	-	-	-	-	-	-	-	-	-	-	-	-
5807888	T	A	MRSN4605_05433	1	.		hypothetical protein	snp	missense_variant	MODERATE	p.Ser202Thr	6	6	0	-	-	-	-	-	-	-	-	-	+	+	-	-	-	-	-	-	-	-	-	-	-	-	-	-	-	-	-	-	-	-	-	+	-	-
6613575	T	A	MRSN4605_06175	1	.		hypothetical protein	snp	missense_variant	MODERATE	p.Lys287Asn	6	6	0	-	-	-	-	-	-	-	-	-	-	-	-	-	-	-	-	-	-	-	-	+	+	+	+	+	-	-	+	-	-	-	-	-	-	-
545513	G	A	MRSN4605_00490	1	.	NP_249174.1	putative acetyltransferase	snp	missense_variant	MODERATE	p.Gly45Asp	5	0	5	-	-	-	-	-	-	-	-	-	-	-	-	-	-	-	-	-	-	-	-	-	-	-	-	-	-	-	-	-	-	-	-	-	-	-
1218900	TGCA	T	MRSN4605_01156	1	.	NP_252610.1	putative transcriptional regulator	del	disruptive_inframe_deletion	MODERATE	p.Gln322del	5	0	5	-	-	-	-	-	-	-	-	-	-	-	-	-	-	-	-	-	-	-	-	-	-	-	-	-	-	-	-	-	-	-	-	-	-	-
1286727	C	A	MRSN4605_01216	1	.	NP_252549.1	putative AMP-binding enzyme	snp	missense_variant	MODERATE	p.Ala615Glu	5	5	0	-	-	-	-	-	-	-	-	-	-	-	-	-	-	-	-	-	-	-	-	-	-	-	-	-	-	-	-	-	-	-	-	-	-	-
1576697	G	A	MRSN4605_01487	1	.	NP_252286.1	putative methylated-DNA--protein-cysteine methyltransferase	snp	missense_variant	MODERATE	p.Ala48Thr	5	5	0	-	-	-	-	-	-	-	-	-	-	-	-	-	-	-	-	-	-	-	-	-	-	-	-	-	-	-	-	-	-	-	-	-	-	-
2621373	G	A	MRSN4605_02499	1	.		hypothetical protein	snp	missense_variant	MODERATE	p.Ser223Leu	5	5	0	-	-	-	-	-	-	-	-	-	-	-	-	-	-	-	-	-	-	-	-	-	-	-	-	-	-	-	-	-	-	-	-	-	-	-
4542389	T	G	MRSN4605_04259	1	.	NP_250178.1	putative carbohydrate kinase	snp	missense_variant	MODERATE	p.Val113Gly	5	5	0	-	-	-	-	-	-	-	-	-	-	-	-	-	-	-	-	-	-	-	-	-	-	-	-	-	-	-	-	-	-	-	-	-	-	-
4731966	T	G	MRSN4605_04429	1	.	NP_249929.1	putative outer membrane component of multidrug efflux pump	snp	missense_variant	MODERATE	p.Leu433Arg	5	0	5	-	-	-	-	-	-	-	-	-	-	-	-	-	-	-	-	-	-	-	-	-	-	-	-	-	-	-	-	-	-	-	-	-	-	-
5980861	C	T	MRSN4605_05613	1	.	NP_253309.1	putative c-type cytochrome	snp	missense_variant	MODERATE	p.Gly65Asp	5	5	0	-	-	-	-	-	-	-	-	-	-	-	-	-	-	-	-	-	-	-	-	-	-	-	-	-	-	-	-	-	-	-	-	-	-	-
6707237	ACTTCCTCGGCTTCGCCGGTCAGGC	A	MRSN4605_06257	1	.		hypothetical protein	del	disruptive_inframe_deletion	MODERATE	p.Ser102_Val110delinsMet	5	0	5	-	-	-	-	-	-	-	-	-	-	-	-	-	-	-	-	-	-	-	-	-	-	-	-	-	-	-	-	-	-	-	-	-	-	-
6718895	C	T	MRSN4605_06269	1	.	NP_253923.1	putative aromatic hydrocarbon reductase	snp	missense_variant	MODERATE	p.Ala138Thr	5	5	0	-	-	-	-	-	-	-	-	-	-	-	-	-	-	-	-	-	-	-	-	-	-	-	-	-	-	-	-	-	-	-	-	-	-	-
1416657	C	T	MRSN4605_01344	1	.	NP_252428.1	putative sodium/hydrogen antiporter	snp	missense_variant	MODERATE	p.Ala147Thr	4	0	4	-	-	-	-	-	-	-	-	-	-	-	-	-	-	-	-	-	-	-	-	-	-	-	-	-	-	-	-	-	-	-	-	-	-	-
1562782	G	C	MRSN4605_01470	1	.		phosphoketolase	manual	missense_variant	MODERATE	p.Asp776Glu	4	4	0	-	-	-	-	-	-	-	-	-	-	-	-	-	-	-	+	-	-	-	-	-	-	-	-	-	-	-	-	-	-	-	-	-	-	-
3521829	A	C	MRSN4605_03252	1	.		hypothetical protein	snp	missense_variant	MODERATE	p.Asn210Thr	4	4	0	-	-	-	-	-	-	-	-	-	-	-	-	-	-	-	-	-	-	-	-	-	-	-	-	-	-	-	-	-	-	-	-	-	-	-
3649758	A	G	MRSN4605_03373	1	.		hypothetical protein	snp	missense_variant	MODERATE	p.Val130Ala	4	0	4	-	-	-	-	-	-	-	-	-	-	-	-	-	-	-	-	-	-	-	-	-	-	-	-	-	-	-	-	-	-	-	-	-	-	-
5528884	C	G	MRSN4605_05168	1	.	NP_252982.1	putative phosphate transporter	snp	missense_variant	MODERATE	p.His201Gln	4	4	0	-	-	-	-	-	-	-	-	-	-	-	-	-	-	-	-	-	-	-	-	-	-	-	-	-	-	-	-	-	-	-	-	-	-	-
6465285	C	T	MRSN4605_06047	1	.	NP_253718.1	putative short chain dehydrogenase	snp	missense_variant	MODERATE	p.Gly147Ser	4	0	4	-	-	-	-	-	-	-	-	-	-	-	-	-	-	-	-	-	-	-	-	-	-	-	-	-	-	-	-	-	-	-	-	-	-	-
6588535	T	A	MRSN4605_06151	1	.	NP_253822.1	hypothetical protein	snp	missense_variant	MODERATE	p.Leu101Gln	4	4	0	-	-	-	-	-	-	-	-	-	-	-	-	-	-	-	-	-	-	-	-	-	-	-	-	-	-	-	-	-	-	-	-	-	-	-
1297644	A	T	MRSN4605_01229	1	.	NP_252536.1	hypothetical protein	manual	missense_variant	MODERATE	p.Gln50Leu	3	3	0	-	-	-	-	-	-	-	-	-	-	-	-	-	-	-	-	-	-	-	-	-	-	-	-	-	-	-	-	-	-	-	-	-	-	-
1766169	T	C	MRSN4605_01649	1	.	NP_252110.1	putative transcriptional regulator	snp	missense_variant	MODERATE	p.Trp108Arg	3	3	0	-	-	-	-	-	-	-	-	-	-	-	-	-	-	-	-	-	-	-	-	-	-	-	-	-	-	-	-	-	-	-	-	-	-	-
2575823	T	A	MRSN4605_02447	1	.		hypothetical protein	manual	missense_variant	MODERATE	p.Ile85Asn	3	3	0	-	-	-	-	-	-	-	-	-	-	-	-	-	-	-	-	-	-	-	-	-	-	-	-	-	-	-	-	-	-	-	-	-	-	-
2986663	G	T	MRSN4605_02842	1	.	NP_251247.1	putative AMP-binding enzyme	snp	missense_variant	MODERATE	p.Gly137Cys	3	3	0	-	-	-	-	-	-	-	-	-	-	-	-	-	-	-	-	-	-	-	-	-	-	-	-	-	-	-	-	-	-	-	-	-	-	-
3375255	G	T	MRSN4605_03113	1	.	NP_250984.1	putative ATP-binding component of ABC transporter	snp	missense_variant	MODERATE	p.Gly144Trp	3	3	0	-	-	-	-	-	-	-	-	-	-	-	-	-	-	-	-	-	-	-	-	-	-	-	-	-	-	-	-	-	-	-	-	-	-	-
3515314	G	A	MRSN4605_03247	1	.	NP_250904.1	putative L-lyxonate transporter	snp	missense_variant	MODERATE	p.Ala242Val	3	0	3	-	-	-	-	-	-	-	-	-	-	-	-	-	-	-	-	-	-	-	-	-	-	-	-	-	-	-	-	-	-	-	-	-	-	-
3659633	A	G	MRSN4605_03382	1	.	NP_250768.1	(7S%2C10S)-hydroperoxide diol synthase	snp	missense_variant	MODERATE	p.Gln98Arg	3	0	3	-	-	-	-	-	-	-	-	-	-	-	-	-	-	-	-	-	-	-	-	-	-	-	-	-	-	-	-	-	-	-	-	-	-	-
3749419	C	G	MRSN4605_03455	1	.	NP_250696.1	putative major facilitator superfamily (MFS) transporter	snp	missense_variant	MODERATE	p.Leu311Val	3	3	0	-	-	-	-	-	-	-	-	-	-	-	-	-	-	-	-	-	-	-	-	-	-	-	-	-	-	-	-	-	-	-	-	-	-	-
3896325	G	A	MRSN4605_03589	1	.		hypothetical protein	snp	missense_variant	MODERATE	p.Ala81Thr	3	0	3	-	-	-	-	-	-	-	-	-	-	-	-	-	-	-	-	-	-	-	-	-	-	-	-	-	-	-	-	-	-	-	-	-	-	-
4595571	GCGCCTGTTCGACGCC	G	MRSN4605_04314	1	.	NP_250124.1	hypothetical protein	del	disruptive_inframe_deletion	MODERATE	p.Phe250_Leu254del	3	3	0	-	-	-	-	-	-	-	-	-	-	-	-	-	-	-	-	-	-	-	-	-	-	-	-	-	-	-	-	-	-	-	-	-	-	-
4832375	G	A	MRSN4605_04520	1	.	NP_249837.1	putative iron-containing alcohol dehydrogenase	snp	missense_variant	MODERATE	p.Gly351Ser	3	0	3	-	-	-	-	-	-	-	-	-	-	-	-	-	-	-	-	-	-	-	-	-	-	-	-	-	-	-	-	-	-	-	-	-	-	-
5267416	G	T	MRSN4605_04931	1	.	NP_249482.1	putative transcriptional regulator	snp	missense_variant	MODERATE	p.Ala96Glu	3	3	0	-	-	-	-	-	-	-	-	-	-	-	-	-	-	-	-	-	-	-	-	-	-	-	-	-	-	-	-	-	-	-	-	-	-	-
5437907	A	T	MRSN4605_05096	1	.	NP_249413.1	hypothetical protein of bacteriophage Pf1	snp	missense_variant	MODERATE	p.Leu78His	3	3	0	-	-	-	-	-	-	-	-	-	-	-	-	-	-	-	-	-	-	-	-	-	-	-	-	-	-	-	-	-	-	-	-	-	-	-
5568825	C	A	MRSN4605_05205	1	.		hypothetical protein	snp	missense_variant	MODERATE	p.Pro175Gln	3	3	0	-	-	-	-	-	-	-	-	-	-	-	-	-	-	-	-	-	-	-	-	-	-	-	-	-	-	-	-	-	-	-	-	-	+	+
5603348	G	A	MRSN4605_05240	1	.		hypothetical protein	snp	missense_variant	MODERATE	p.Thr43Ile	3	0	3	-	-	-	-	-	-	-	-	-	-	-	-	-	-	-	-	-	-	-	-	-	-	-	-	-	-	-	-	-	-	-	-	-	-	-
6800931	A	T	MRSN4605_06344	1	.	NP_253993.1	hypothetical protein	snp	missense_variant	MODERATE	p.Val48Asp	3	3	0	-	-	-	-	-	-	-	-	-	-	-	-	-	-	-	-	-	-	-	-	-	-	-	-	-	-	-	-	-	-	-	-	-	-	-
248690	C	T	MRSN4605_00219	1	.	NP_248910.1	putative aldehyde dehydrogenase	snp	missense_variant	MODERATE	p.Ser243Phe	2	2	0	-	-	-	-	-	-	-	-	-	-	-	-	-	-	-	-	-	-	-	-	-	-	-	-	-	-	-	-	-	-	-	-	-	-	-
308192	C	T	MRSN4605_00272	1	.	NP_248963.1	putative transcriptional regulator	snp	missense_variant	MODERATE	p.Arg135His	2	0	2	-	-	-	-	-	-	-	-	-	-	-	-	-	-	-	-	-	-	-	-	-	-	-	-	-	-	-	-	-	-	-	-	-	-	-
378970	C	T	MRSN4605_00339	1	.		putative phosphatase	snp	missense_variant	MODERATE	p.Arg159His	2	0	2	-	-	-	-	-	-	-	-	-	-	-	-	-	-	-	-	-	-	-	-	-	-	-	-	-	-	-	-	-	-	-	-	-	-	-
553262	G	C	MRSN4605_00499	1	.	NP_249183.1	hypothetical protein	snp	missense_variant	MODERATE	p.Val209Leu	2	0	2	-	-	-	-	-	-	-	-	-	-	-	-	-	-	-	-	-	-	-	-	-	-	-	-	-	-	-	-	-	-	-	-	-	-	-
878918	A	G	MRSN4605_00823	1	.		hypothetical protein	snp	missense_variant	MODERATE	p.Val38Ala	2	2	0	-	-	-	-	-	-	-	-	-	-	-	-	-	-	-	-	-	-	-	+	-	-	-	-	-	+	-	-	-	-	-	-	-	-	-
1061935	G	T	MRSN4605_01008	1	.		hypothetical protein	snp	missense_variant	MODERATE	p.Asn259Lys	2	2	0	-	-	-	-	-	-	-	-	-	-	-	-	-	-	-	-	-	-	-	-	-	-	-	-	-	-	-	-	-	-	-	-	-	-	-
1549414	T	G	MRSN4605_01460	1	.	NP_252313.1	hypothetical protein	snp	missense_variant	MODERATE	p.Trp178Gly	2	0	2	-	-	-	-	-	-	-	-	-	-	-	-	-	-	-	-	-	-	-	-	-	-	-	-	-	-	-	-	-	-	-	-	-	-	-
1765501	G	C	MRSN4605_01648	1	.	NP_252111.1	hypothetical protein	snp	missense_variant	MODERATE	p.Val392Leu	2	2	0	-	-	-	-	-	-	-	-	-	-	-	-	-	-	-	-	-	-	-	-	-	-	-	-	-	-	-	-	-	-	-	-	-	-	-
2004928	G	A	MRSN4605_01873	1	.	NP_251905.1	putative transcriptional regulator	snp	missense_variant	MODERATE	p.Gly316Ser	2	2	0	-	-	-	-	-	-	-	-	-	-	-	-	-	-	-	-	-	-	-	-	-	-	-	-	-	-	-	-	-	-	-	-	-	-	-
2020406	G	A	MRSN4605_01893	1	.		hypothetical protein	snp	missense_variant	MODERATE	p.Arg37His	2	2	0	-	-	-	-	-	-	-	-	-	-	-	-	-	-	-	-	-	-	-	+	-	-	-	-	-	+	-	-	-	-	-	-	-	-	-
2799446	G	A	MRSN4605_02659	1	.		hypothetical protein	snp	missense_variant	MODERATE	p.Gly61Arg	2	2	0	-	-	-	-	-	-	-	-	-	-	-	-	-	-	-	-	-	-	-	+	-	-	-	-	-	+	-	-	-	-	-	-	-	-	-
3086803	C	G	MRSN4605_02928	1	.	NP_251163.1	maleylpyruvate isomerase	snp	missense_variant	MODERATE	p.Ala93Pro	2	2	0	-	-	-	-	-	-	-	-	-	-	-	-	-	-	-	-	-	-	-	-	-	-	-	-	-	-	-	-	-	-	-	-	-	-	-
3118333	G	T	MRSN4605_02940	1	.		hypothetical protein	snp	missense_variant	MODERATE	p.Ala65Ser	2	2	0	-	-	-	-	-	-	-	-	-	-	-	-	-	-	-	-	-	-	-	-	-	-	-	-	-	-	-	-	-	-	-	-	-	-	-
3151967	C	CATCACG	MRSN4605_02959	1	.		hypothetical protein	ins	disruptive_inframe_insertion	MODERATE	p.Asp23_His24dup	2	1	1	-	-	-	-	-	-	-	-	-	-	-	-	-	-	-	-	-	-	-	-	-	-	-	-	-	-	-	-	-	-	-	-	-	-	-
3487224	A	C	MRSN4605_03224	1	.		hypothetical protein	snp	missense_variant	MODERATE	p.Lys52Gln	2	2	0	-	-	-	-	-	-	-	-	-	-	-	-	-	-	-	-	-	-	-	-	-	-	-	-	-	-	-	-	-	-	-	-	-	-	-
3651394	C	T	MRSN4605_03375	1	.	NP_250775.1	putative ring-hydroxylating dioxygenase small subunit	snp	missense_variant	MODERATE	p.Ala58Thr	2	2	0	-	-	-	-	-	-	-	-	-	-	-	-	-	-	-	-	-	-	-	-	-	-	-	-	-	-	-	-	-	-	-	-	-	-	-
3714362	G	T	MRSN4605_03421	1	.	NP_250731.1	Amino acid permease	snp	missense_variant	MODERATE	p.Gln21Lys	2	2	0	-	-	-	-	-	-	-	-	-	-	-	-	-	-	-	-	-	-	-	-	-	+	-	-	+	-	-	-	-	-	-	-	-	-	-
4307349	C	G	MRSN4605_04042	1	.	NP_250310.1	putative transcriptional regulator	snp	missense_variant	MODERATE	p.Arg28Pro	2	2	0	-	-	-	-	-	-	-	-	-	-	-	-	-	-	-	-	-	-	-	-	-	-	-	-	-	-	-	-	-	-	-	-	-	-	-
4499049	GCAC	G	MRSN4605_04221	1	.	NP_249988.1	putative metal transporter	del	conservative_inframe_deletion	MODERATE	p.His177del	2	0	2	-	-	-	-	-	-	-	-	-	-	-	-	-	-	-	-	-	-	-	-	-	-	-	-	-	-	-	-	-	-	-	-	-	-	-
4912886	C	A	MRSN4605_04600	1	.		hypothetical protein	snp	missense_variant	MODERATE	p.Gln527His	2	2	0	-	-	-	-	-	-	-	-	-	-	-	-	-	-	-	-	-	-	-	-	-	-	-	-	-	-	-	-	-	-	-	-	-	-	-
5230573	C	A	MRSN4605_04896	1	.		hypothetical protein	snp	missense_variant	MODERATE	p.Ala94Ser	2	2	0	-	-	-	-	-	-	-	-	-	-	-	-	-	-	-	-	-	-	-	+	-	-	-	-	-	+	-	-	-	-	-	-	-	-	-
5593265	C	A	MRSN4605_05229	1	.		hypothetical protein	snp	missense_variant	MODERATE	p.Lys80Asn	2	2	0	-	-	-	-	-	-	-	-	-	-	-	-	-	-	-	-	-	-	-	-	-	-	-	-	-	-	-	-	-	-	-	-	-	-	-
6123052	C	T	MRSN4605_05740	1	.		hypothetical protein	snp	missense_variant	MODERATE	p.Ala229Val	2	2	0	-	-	-	-	-	-	-	-	-	-	-	-	-	-	-	-	-	-	-	-	-	-	-	-	-	-	-	-	-	-	-	-	-	-	-
6605916	G	A	MRSN4605_06170	1	.		hypothetical protein	snp	missense_variant	MODERATE	p.Glu159Lys	2	2	0	-	-	-	-	-	-	-	-	-	-	-	-	-	-	-	-	-	-	-	-	-	-	-	-	-	-	-	-	-	-	-	-	-	-	-
10222	A	T	MRSN4605_00007	1	.	NP_250767.1	oleate 10S-lipoxygenase	snp	missense_variant	MODERATE	p.Gln521Leu	1	0	1	-	-	-	-	-	-	-	-	-	-	-	-	-	-	-	-	-	-	-	-	-	-	-	-	-	-	-	-	-	-	-	-	-	-	-
254009	A	T	MRSN4605_00223	1	.	NP_248914.1	putative dihydrodipicolinate synthetase	snp	missense_variant	MODERATE	p.Leu177Gln	1	0	1	-	-	-	-	-	-	-	-	-	-	-	-	-	-	-	-	-	-	-	-	-	-	-	-	-	-	-	-	-	-	-	-	-	-	-
358140	T	C	MRSN4605_00319	1	.	NP_249008.1	D-2-hydroxyglutarate dehydrogenase	snp	missense_variant	MODERATE	p.Phe230Leu	1	1	0	-	-	-	-	-	-	-	-	-	-	-	-	-	-	-	-	-	-	-	-	-	-	-	-	-	-	+	-	-	-	-	-	-	-	-
395563	C	T	MRSN4605_00355	1	.	NP_249042.1	hypothetical protein	snp	missense_variant	MODERATE	p.Ala98Thr	1	0	1	-	-	-	-	-	-	-	-	-	-	-	-	-	-	-	-	-	-	-	-	-	-	-	-	-	-	-	-	-	-	-	-	-	-	-
415957	G	A	MRSN4605_00375	1	.	NP_249060	putative protein	snp	missense_variant	MODERATE	p.Arg39Cys	1	0	1	-	-	-	-	-	-	-	-	-	-	-	-	-	-	-	-	-	-	-	-	-	-	-	-	-	-	-	-	-	-	-	-	-	-	-
444326	C	T	MRSN4605_00407	1	.	NP_249091.1	putative cystathionine gamma-lyase	snp	missense_variant	MODERATE	p.Arg69Cys	1	0	1	-	-	-	-	-	-	-	-	-	-	-	-	-	-	-	-	-	-	-	-	-	-	-	-	-	-	-	-	-	-	-	-	-	-	-
553573	C	A	MRSN4605_00500	1	.	NP_249184.1	putative biotin-requiring enzyme	snp	missense_variant	MODERATE	p.Ala34Asp	1	1	0	-	-	-	-	-	-	-	-	-	-	-	-	-	-	-	-	-	-	-	-	-	-	-	-	-	-	-	-	-	-	-	-	-	-	-
575742	G	T	MRSN4605_00521	1	.	NP_249206.1	putative transcriptional regulator	snp	missense_variant	MODERATE	p.Pro129Thr	1	1	0	-	-	-	-	-	-	-	-	-	-	-	-	-	-	-	-	-	-	-	-	-	-	-	-	-	-	-	-	-	-	-	-	-	-	-
675688	G	T	MRSN4605_00626	1	.	NP_249308.1	putative bacteriophage protein	snp	missense_variant	MODERATE	p.Gly87Val	1	0	1	-	-	-	-	-	-	-	-	-	-	-	-	-	-	-	-	-	-	-	-	-	-	-	-	-	-	-	-	-	-	-	-	-	-	-
829612	G	A	MRSN4605_00776	1	.	NP_252863.1	putative transcriptional regulator	snp	missense_variant	MODERATE	p.His304Tyr	1	0	1	-	-	-	-	-	-	-	-	-	-	-	-	-	-	-	-	-	-	-	-	-	-	-	-	-	-	-	-	-	-	-	-	-	-	-
897911	T	C	MRSN4605_00855	1	.		hypothetical protein	snp	missense_variant	MODERATE	p.Ile514Thr	1	0	1	-	-	-	-	-	-	-	-	-	-	-	-	-	-	-	-	-	-	-	-	-	-	-	-	-	-	-	-	-	-	-	-	-	-	-
920958	A	G	MRSN4605_00886	1	.	NP_252822.1	cytochrome c oxidase subunit (cbb3-type)	snp	missense_variant	MODERATE	p.Val202Ala	1	0	1	-	-	-	-	-	-	-	-	-	-	-	-	-	-	-	-	-	-	-	-	-	-	-	-	-	-	-	-	-	-	-	-	-	-	-
937155	T	G	MRSN4605_00901	1	.		hypothetical protein	snp	missense_variant	MODERATE	p.Thr108Pro	1	1	0	-	-	-	-	-	-	-	-	-	-	-	-	-	-	-	-	-	-	-	-	-	-	-	-	-	-	-	-	-	-	-	-	-	-	-
960902	G	T	MRSN4605_00921	1	.	NP_252789.1	putative dehydrogenase	snp	missense_variant	MODERATE	p.Pro183Thr	1	1	0	-	-	-	-	-	-	-	-	-	-	-	-	-	-	-	-	-	-	-	-	-	-	-	-	-	-	-	-	-	-	-	-	-	-	-
1002744	A	T	MRSN4605_00960	1	.		hypothetical protein	snp	missense_variant	MODERATE	p.Gln61Leu	1	1	0	-	-	-	-	-	-	-	-	-	-	-	-	-	-	-	-	-	-	-	-	-	-	-	-	-	-	-	-	-	-	-	-	-	-	-
1060770	C	A	MRSN4605_01007	1	.		hypothetical protein	snp	missense_variant	MODERATE	p.Lys258Asn	1	0	1	-	-	-	-	-	-	-	-	-	-	-	-	-	-	-	-	-	-	-	-	-	-	-	-	-	-	-	-	-	-	-	-	-	-	-
1229010	C	T	MRSN4605_01164	1	.	NP_252602.1	putative protease	snp	missense_variant	MODERATE	p.Pro205Leu	1	1	0	-	-	-	-	-	-	-	-	-	-	-	-	-	-	-	-	-	-	-	-	-	-	-	-	-	-	-	-	-	-	-	-	-	-	-
1403811	C	T	MRSN4605_01330	1	.	NP_252442.1	hypothetical protein	snp	missense_variant	MODERATE	p.Ala83Val	1	0	1	-	-	-	-	-	-	-	-	-	-	-	-	-	-	-	-	-	-	-	-	-	-	-	-	-	-	-	-	-	-	-	-	-	-	-
1434163	T	A	MRSN4605_01356	1	.		hypothetical protein	snp	missense_variant	MODERATE	p.Leu1490Gln	1	0	1	-	-	-	-	-	-	-	-	-	-	-	-	-	-	-	-	-	-	-	-	-	-	-	-	-	-	-	-	-	-	-	-	-	-	-
1557749	G	C	MRSN4605_01468	1	.		hypothetical protein	snp	missense_variant	MODERATE	p.Asp347Glu	1	1	0	-	-	-	-	-	-	-	-	-	-	-	-	-	-	-	-	-	-	-	-	-	-	-	-	-	-	-	-	-	-	+	-	-	-	-
1944040	G	C	MRSN4605_01810	1	.	NP_251958.1	putative TonB-dependent receptor	snp	missense_variant	MODERATE	p.Glu356Gln	1	0	1	-	-	-	-	-	-	-	-	-	-	-	-	-	-	-	-	-	-	-	-	-	-	-	-	-	-	-	-	-	-	-	-	-	-	-
1989526	A	T	MRSN4605_01856	1	.	NP_251922.1	putative nuclease	snp	missense_variant	MODERATE	p.Gln96Leu	1	1	0	-	-	-	-	-	-	-	-	-	-	-	-	-	-	-	-	-	-	-	-	-	-	-	-	-	-	-	-	-	-	-	-	-	-	-
2151465	G	A	MRSN4605_02015	1	.		hypothetical protein	snp	missense_variant	MODERATE	p.Ala484Val	1	1	0	-	-	-	-	-	-	-	-	-	-	-	-	-	-	-	-	-	-	-	-	-	-	-	-	-	-	-	-	-	-	-	-	-	-	-
2187063	T	A	MRSN4605_02041	1	.		hypothetical protein	snp	missense_variant	MODERATE	p.Val249Glu	1	1	0	-	-	-	-	-	-	-	-	-	-	-	-	-	-	-	-	-	-	-	-	-	-	-	-	-	-	-	-	-	-	-	-	-	-	-
2236052	A	T	MRSN4605_02093	1	.	NP_251737.1	putative D-alanyl-D-alanine carboxypeptidase	snp	missense_variant	MODERATE	p.Leu204Gln	1	0	1	-	-	-	-	-	-	-	-	-	-	-	-	-	-	-	-	-	-	-	-	-	-	-	-	-	-	-	-	-	-	-	-	-	-	-
2330753	C	G	MRSN4605_02186	1	.	NP_251646.1	hypothetical protein	snp	missense_variant	MODERATE	p.Leu165Val	1	1	0	-	-	-	-	-	-	-	-	-	-	-	-	-	-	-	-	-	-	-	-	-	-	-	-	-	-	-	-	-	-	-	-	-	-	-
2419497	T	G	MRSN4605_02271	1	.		hypothetical protein	snp	missense_variant	MODERATE	p.Leu312Val	1	1	0	-	-	-	-	-	-	-	-	-	-	-	-	-	-	-	-	-	-	-	-	-	-	-	-	-	-	-	-	-	-	-	-	-	-	-
2472715	T	C	MRSN4605_02327	1	.		hypothetical protein	snp	missense_variant	MODERATE	p.Ile20Val	1	1	0	-	-	-	-	-	-	-	-	-	-	-	-	-	-	-	-	-	-	-	-	-	-	-	-	-	-	-	-	-	-	-	-	-	-	-
2603145	T	G	MRSN4605_02479	1	.		hypothetical protein	snp	missense_variant	MODERATE	p.Val22Gly	1	0	1	-	-	-	-	-	-	-	-	-	-	-	-	-	-	-	-	-	-	-	-	-	-	-	-	-	-	-	-	-	-	-	-	-	-	-
2734432	C	T	MRSN4605_02596	1	.		hypothetical protein	snp	missense_variant	MODERATE	p.Gly172Asp	1	0	1	-	-	-	-	-	-	-	-	-	-	-	-	-	-	-	-	-	-	-	-	-	-	-	-	-	-	-	-	-	-	-	-	-	-	-
2998675	C	T	MRSN4605_02852	1	.		hypothetical protein	snp	missense_variant	MODERATE	p.Val216Met	1	0	1	-	-	-	-	-	-	-	-	-	-	-	-	-	-	-	-	-	-	-	-	-	-	-	-	-	-	-	-	-	-	-	-	-	-	-
3000821	C	T	MRSN4605_02854	1	.	NP_251236.1	putative ring-cleaving dioxygenase	snp	missense_variant	MODERATE	p.Pro140Ser	1	1	0	-	-	-	-	-	-	-	-	-	-	-	-	-	-	-	-	-	-	-	-	-	-	-	-	-	-	-	-	-	-	-	-	-	-	-
3088958	A	G	MRSN4605_02930	1	.	NP_251161.1	hypothetical protein	snp	missense_variant	MODERATE	p.Leu86Pro	1	1	0	-	-	-	-	-	-	-	-	-	-	-	-	-	-	-	-	-	-	-	-	-	-	-	-	-	-	-	-	-	-	-	-	-	-	-
3267321	G	A	MRSN4605_03027	1	.		hypothetical protein	snp	missense_variant	MODERATE	p.Ala70Thr	1	0	1	-	-	-	-	-	-	-	-	-	-	-	-	-	-	-	-	-	-	-	-	-	-	-	-	-	-	-	-	-	-	-	-	-	-	-
3293364	A	C	MRSN4605_03047	1	.	NP_251049.1	putative transcriptional regulator	snp	missense_variant	MODERATE	p.Asp25Ala	1	1	0	-	-	-	-	-	-	-	-	-	-	-	-	-	-	-	-	-	-	-	-	-	-	-	-	-	-	-	-	-	-	-	-	-	-	-
3329174	G	A	MRSN4605_03077	1	.	NP_251019.1	putative ATP-binding component of ABC transporter	snp	missense_variant	MODERATE	p.Ala185Thr	1	0	1	-	-	-	-	-	-	-	-	-	-	-	-	-	-	-	-	-	-	-	-	-	-	-	-	-	-	-	-	-	-	-	-	-	-	-
3330171	C	T	MRSN4605_03078	1	.		hypothetical protein	snp	missense_variant	MODERATE	p.Pro250Ser	1	0	1	-	-	-	-	-	-	-	-	-	-	-	-	-	-	-	-	-	-	-	-	-	-	-	-	-	-	-	-	-	-	-	-	-	-	-
3353051	C	G	MRSN4605_03099	1	.	NP_250998.1	putative ATP-binding component of ABC transporter	snp	missense_variant	MODERATE	p.His226Gln	1	0	1	-	-	-	-	-	-	-	-	-	-	-	-	-	-	-	-	-	-	-	-	-	-	-	-	-	-	-	-	-	-	-	-	-	-	-
3532719	A	T	MRSN4605_03264	1	.	NP_250887.1	hypothetical protein	snp	missense_variant	MODERATE	p.Val230Asp	1	1	0	-	-	-	-	-	-	-	-	-	-	-	-	-	-	-	-	-	-	-	-	-	-	-	-	-	-	-	-	-	-	-	-	-	-	-
3585452	A	G	MRSN4605_03311	1	.		hypothetical protein	snp	missense_variant	MODERATE	p.Glu5Gly	1	0	1	-	-	-	-	-	-	-	-	-	-	-	-	-	-	-	-	-	-	-	-	-	-	-	-	-	-	-	-	-	-	-	-	-	-	-
3653818	T	A	MRSN4605_03377	1	.	NP_250773.1	putative ring-hydroxylating dioxygenase subunit	snp	missense_variant	MODERATE	p.Ser324Cys	1	0	1	-	-	-	-	-	-	-	-	-	-	-	-	-	-	-	-	-	-	-	-	-	-	-	-	-	-	-	-	-	-	-	-	-	-	-
3725678	A	C	MRSN4605_03434	1	.	NP_250716.1	hypothetical protein	snp	missense_variant	MODERATE	p.Thr293Pro	1	0	1	-	-	-	-	-	-	-	-	-	-	-	-	-	-	-	-	-	-	-	-	-	-	-	-	-	-	-	-	-	-	-	-	-	-	-
3754647	A	T	MRSN4605_03459	1	.	NP_250692.1	hypothetical protein	snp	missense_variant	MODERATE	p.Val264Glu	1	1	0	-	-	-	-	-	-	-	-	-	-	-	-	-	-	-	-	-	-	-	-	-	-	-	-	-	-	-	-	-	-	-	-	-	-	-
3931588	C	A	MRSN4605_03617	1	.		hypothetical protein	snp	missense_variant	MODERATE	p.Arg52Ser	1	1	0	-	-	-	-	-	-	-	-	-	-	-	-	-	-	-	-	-	-	-	-	-	-	-	-	-	-	-	-	-	-	-	-	-	-	-
3946433	C	T	MRSN4605_03630	1	.	NP_252495.1	hypothetical protein	snp	missense_variant	MODERATE	p.Arg340Cys	1	1	0	-	-	-	-	-	-	-	-	-	-	-	-	-	-	-	-	-	-	-	-	-	-	-	-	-	-	-	-	-	-	-	-	-	-	-
3955701	G	A	MRSN4605_03642	1	.		hypothetical protein	snp	missense_variant	MODERATE	p.Ala197Thr	1	0	1	-	-	-	-	-	-	-	-	-	-	-	-	-	-	-	-	-	-	-	-	-	-	-	-	-	-	-	-	-	-	-	-	-	-	-
4185190	C	T	MRSN4605_03922	1	.	NP_250424.1	hypothetical protein	snp	missense_variant	MODERATE	p.Ala225Thr	1	1	0	-	-	-	-	-	-	-	-	-	-	-	-	-	-	-	-	-	-	-	-	-	-	-	-	-	-	-	-	-	-	-	-	-	-	-
4315020	A	T	MRSN4605_04050	1	.	NP_250302.1	hybrid sensor kinase	snp	missense_variant	MODERATE	p.Gln76Leu	1	0	1	-	-	-	-	-	-	-	-	-	-	-	-	-	-	-	-	-	-	-	-	-	-	-	-	-	-	-	-	-	-	-	-	-	-	-
4387925	A	C	MRSN4605_04118	1	.		hypothetical protein	snp	missense_variant	MODERATE	p.Leu126Arg	1	0	1	-	-	-	-	-	-	-	-	-	-	-	-	-	-	-	-	-	-	-	-	-	-	-	-	-	-	-	-	-	-	-	-	-	-	-
4409162	T	A	MRSN4605_04137	1	.	NP_250217.1	putative transcriptional regulator	snp	missense_variant	MODERATE	p.Gln177Leu	1	0	1	-	-	-	-	-	-	-	-	-	-	-	-	-	-	-	-	-	-	-	-	-	-	-	-	-	-	-	-	-	-	-	-	-	-	-
4654056	C	G	MRSN4605_04366	1	.	NP_250082.1	putative glycosyl transferase	snp	missense_variant	MODERATE	p.Ala316Pro	1	1	0	-	-	-	-	-	-	-	-	-	-	-	-	-	-	-	-	-	-	-	-	-	-	-	-	-	-	-	-	-	-	-	-	-	-	-
4815279	G	GCAGGCCGAGCAGGCC	MRSN4605_04509	1	.	NP_249849.1	putative two-component sensor	ins	conservative_inframe_insertion	MODERATE	p.Leu27_His28insGlyLeuLeuGlyLeu	1	0	1	-	-	-	-	-	-	-	-	-	-	-	-	-	-	-	-	-	-	-	-	-	-	-	-	-	-	-	-	-	-	-	-	-	-	-
4841276	C	T	MRSN4605_04529	1	.	NP_249828.1	putative oxidoreductase	snp	missense_variant	MODERATE	p.Ala149Val	1	0	1	-	-	-	-	-	-	-	-	-	-	-	-	-	-	-	-	-	-	-	-	-	-	-	-	-	-	-	-	-	-	-	-	-	-	-
4937227	C	T	MRSN4605_04624	1	.	NP_249737.1	beta-agarase	snp	missense_variant	MODERATE	p.Gly377Asp	1	0	1	-	-	-	-	-	-	-	-	-	-	-	-	-	-	-	-	-	-	-	-	-	-	-	-	-	-	-	-	-	-	-	-	-	-	-
5214119	CGTACAA	C	MRSN4605_04884	1	.		hypothetical protein	del	conservative_inframe_deletion	MODERATE	p.Leu260_Tyr261del	1	0	1	-	-	-	-	-	-	-	-	-	-	-	-	-	-	-	-	-	-	-	-	-	-	-	-	-	-	-	-	-	-	-	-	-	-	-
5243512	G	T	MRSN4605_04910	1	.		hypothetical protein	snp	missense_variant	MODERATE	p.Cys36Phe	1	1	0	-	-	-	-	-	-	-	-	-	-	-	-	-	-	-	-	-	-	-	-	-	-	-	-	-	-	-	-	-	-	-	-	-	-	-
5388851	G	C	MRSN4605_05043	1	.		hypothetical protein	snp	missense_variant	MODERATE	p.Leu122Val	1	0	1	-	-	-	-	-	-	-	-	-	-	-	-	-	-	-	-	-	-	-	-	-	-	-	-	-	-	-	-	-	-	-	-	-	-	-
5391536	G	C	MRSN4605_05047	1	.		hypothetical protein	snp	missense_variant	MODERATE	p.Leu75Val	1	1	0	-	-	-	-	-	-	-	-	-	-	-	-	-	-	-	-	-	-	-	-	-	-	-	-	-	-	-	-	-	-	-	-	-	-	-
5562092	C	A	MRSN4605_05198	1	.		hypothetical protein	snp	missense_variant	MODERATE	p.Ala130Asp	1	1	0	-	-	-	-	-	-	-	-	-	-	-	-	-	-	-	-	-	-	-	-	-	-	-	-	-	-	-	-	-	-	-	-	-	-	-
5588085	G	A	MRSN4605_05223	1	.	NP_253033.1	putative major facilitator superfamily (MFS) transporter	snp	missense_variant	MODERATE	p.Ala22Val	1	0	1	-	-	-	-	-	-	-	-	-	-	-	-	-	-	-	-	-	-	-	-	-	-	-	-	-	-	-	-	-	-	-	-	-	-	-
5588900	C	G	MRSN4605_05224	1	.	NP_253034.1	putative hydrolase	snp	missense_variant	MODERATE	p.Gly170Arg	1	0	1	-	-	-	-	-	-	-	-	-	-	-	-	-	-	-	-	-	-	-	-	-	-	-	-	-	-	-	-	-	-	-	-	-	-	-
5614765	C	A	MRSN4605_05252	1	.		hypothetical protein	snp	missense_variant	MODERATE	p.Ala51Asp	1	0	1	-	-	-	-	-	-	-	-	-	-	-	-	-	-	-	-	-	-	-	-	-	-	-	-	-	-	-	-	-	-	-	-	-	-	-
5635198	C	T	MRSN4605_05272	1	.		hypothetical protein	snp	missense_variant	MODERATE	p.Gly171Ser	1	0	1	-	-	-	-	-	-	-	-	-	-	-	-	-	-	-	-	-	-	-	-	-	-	-	-	-	-	-	-	-	-	-	-	-	-	-
5674081	C	T	MRSN4605_05305	1	.	NP_253113.1	hypothetical protein	snp	missense_variant	MODERATE	p.Leu485Phe	1	0	1	-	-	-	-	-	-	-	-	-	-	-	-	-	-	-	-	-	-	-	-	-	-	-	-	-	-	-	-	-	-	-	-	-	-	-
5702193	G	A	MRSN4605_05336	1	.	NP_253144.1	hypothetical protein	snp	missense_variant	MODERATE	p.Arg4Cys	1	1	0	-	-	-	-	-	-	-	-	-	-	-	-	-	-	-	-	-	-	-	-	-	-	-	-	-	-	-	-	-	-	-	-	-	-	-
6026770	C	T	MRSN4605_05652	1	.	NP_253343.1	putative major facilitator superfamily (MFS) transporter	snp	missense_variant	MODERATE	p.Met95Ile	1	0	1	-	-	-	-	-	-	-	-	-	-	-	-	-	-	-	-	-	-	-	-	-	-	-	-	-	-	-	-	-	-	-	-	-	-	-
6157968	G	A	MRSN4605_05774	1	.	NP_253455.1	F	snp	missense_variant	MODERATE	p.Pro114Leu	1	0	1	-	-	-	-	-	-	-	-	-	-	-	-	-	-	-	-	-	-	-	-	-	-	-	-	-	-	-	-	-	-	-	-	-	-	-
6172596	C	T	MRSN4605_05787	1	.	NP_253471.1	hypothetical protein	snp	missense_variant	MODERATE	p.Val128Ile	1	1	0	-	-	-	-	-	-	-	-	-	-	-	-	-	-	-	-	-	-	-	-	-	-	-	-	-	-	-	-	-	-	-	-	-	-	-
6173177	G	A	MRSN4605_05788	1	.	NP_253468.1	hypothetical protein	snp	missense_variant	MODERATE	p.Arg262Cys	1	1	0	-	-	-	-	-	-	-	-	-	-	-	-	-	-	-	-	-	-	-	-	-	-	-	-	-	-	-	-	-	-	-	-	-	-	-
6721468	A	T	MRSN4605_06271	1	.	NP_253925.1	putative O-antigen acetylase	snp	missense_variant	MODERATE	p.Cys458Ser	1	1	0	-	-	-	-	-	-	-	-	-	-	-	-	-	-	-	-	-	-	-	-	-	-	-	-	-	-	-	-	-	-	-	-	-	-	-
6730465	C	CGCGGCAACGGCGCGG	MRSN4605_06277	1	.	NP_253931.1	hypothetical protein	ins	disruptive_inframe_insertion	MODERATE	p.Gly187_Asn191dup	1	0	1	-	-	-	-	-	-	-	-	-	-	-	-	-	-	-	-	-	-	-	-	-	-	-	-	-	-	-	-	-	-	-	-	-	-	-
6778150	T	A	MRSN4605_06324	1	.	NP_253977.1	hypothetical protein	snp	missense_variant	MODERATE	p.Leu181Gln	1	0	1	-	-	-	-	-	-	-	-	-	-	-	-	-	-	-	-	-	-	-	-	-	-	-	-	-	-	-	-	-	-	-	-	-	-	-
6829704	C	T	MRSN4605_06371	1	.	NP_254020.1	hypothetical protein	snp	missense_variant	MODERATE	p.Ala107Thr	1	1	0	-	-	-	-	-	-	-	-	-	-	-	-	-	-	-	-	-	-	-	-	-	-	-	-	-	-	-	-	-	-	-	-	-	-	-
1533857	T	G	MRSN4605_01444	1	accA	NP_252329.1	acetyl-coenzyme A carboxylase carboxyl transferase (alpha subunit)	snp	missense_variant	MODERATE	p.Leu24Arg	1	1	0	-	-	-	-	-	-	-	-	-	-	-	-	-	-	-	-	-	-	-	-	-	-	-	-	-	-	-	-	-	-	-	-	-	-	-
4370773	C	T	MRSN4605_04101	1	aer	NP_250252.1	aerotaxis receptor Aer	snp	stop_gained	HIGH	p.Gln124*	1	1	0	-	-	-	-	-	-	-	-	-	-	-	-	-	-	-	-	-	-	+	-	-	-	-	-	-	-	-	-	-	-	-	-	-	-	-
1643915	G	A	MRSN4605_01543	1	algK	NP_252233.1	alginate biosynthetic protein AlgK precursor	snp	missense_variant	MODERATE	p.Arg311Cys	1	0	1	-	-	-	-	-	-	-	-	-	-	-	-	-	-	-	-	-	-	-	-	-	-	-	-	-	-	-	-	-	-	-	-	-	-	-
5302620	T	C	MRSN4605_04962	1	algU	NP_249453.1	sigma factor AlgU	snp	missense_variant	MODERATE	p.Asp115Gly	1	0	1	-	-	-	-	-	-	-	-	-	-	-	-	-	-	-	-	-	-	-	-	-	-	-	-	-	-	-	-	-	-	-	-	-	-	-
5078148	C	T	MRSN4605_04771	1	alpR	NP_249597.1	lysis phenotype repressor%2C AlpR	snp	missense_variant	MODERATE	p.Pro196Ser	6	0	6	-	-	-	-	-	-	-	-	-	-	-	-	-	-	-	-	-	-	-	-	-	-	-	-	-	-	-	-	-	-	-	-	-	-	-
950885	C	G	MRSN4605_00910	1	ampR	NP_252798.1	transcriptional regulator AmpR	snp	missense_variant	MODERATE	p.Asp135Glu	24	0	24	-	-	-	-	-	-	-	-	-	-	-	-	-	-	-	-	-	-	-	-	-	-	-	-	-	-	-	-	-	-	-	-	-	-	-
3048005	C	T	MRSN4605_02889	1	antA	NP_251202.1	anthranilate dioxygenase large subunit	snp	missense_variant	MODERATE	p.Gly289Ser	3	3	0	-	-	-	-	-	-	-	-	-	-	-	-	-	-	-	-	-	-	-	-	-	-	-	-	-	-	-	-	-	-	-	-	-	-	-
6986461	A	G	MRSN4605_06517	1	armZ	NP_254158.1	ArmZ	snp	missense_variant	MODERATE	p.Cys305Arg	1	1	0	-	-	-	-	-	-	-	-	-	-	-	-	-	-	-	-	-	-	-	-	-	-	-	-	-	-	-	-	-	-	-	-	-	-	-
2287991	C	T	MRSN4605_02141	1	aroP1	NP_251690.1	aromatic amino acid transport protein AroP1	snp	missense_variant	MODERATE	p.Ala83Val	2	2	0	-	-	-	-	-	-	-	-	-	-	-	-	-	-	-	-	-	-	-	-	-	-	-	-	-	-	-	-	-	-	-	-	-	-	-
5091929	C	T	MRSN4605_04785	1	aruC	NP_249586.1	N2-Succinylornithine 5-aminotransferase (SOAT) %3D N2-acetylornithine 5-aminotransferase (ACOAT)	snp	missense_variant	MODERATE	p.Ala90Thr	1	0	1	-	-	-	-	-	-	-	-	-	-	-	-	-	-	-	-	-	-	-	-	-	-	-	-	-	-	-	-	-	-	-	-	-	-	-
5021462	T	G	MRSN4605_04710	1	aspS	NP_249654.1	aspartyl-tRNA synthetase	snp	missense_variant	MODERATE	p.Glu56Asp	1	0	1	-	-	-	-	-	-	-	-	-	-	-	-	-	-	-	-	-	-	-	-	-	-	-	-	-	-	-	-	-	-	-	-	-	-	-
7081905	A	G	MRSN4605_06606	1	atpB	NP_254247.1	ATP synthase A chain	snp	missense_variant	MODERATE	p.Val173Ala	5	5	0	-	-	-	-	-	-	-	-	-	-	-	-	-	-	-	-	-	-	-	-	-	-	-	-	-	-	-	-	-	-	-	-	-	-	-
5275792	G	T	MRSN4605_04939	1	azoR1	NP_249476.1	FMN-dependent NADH-azoreductase 1%2C AzoR1	snp	missense_variant	MODERATE	p.Gln158Lys	3	3	0	-	-	-	-	-	-	-	-	-	-	-	-	-	-	-	-	-	-	-	-	-	-	-	-	-	-	-	-	-	-	-	-	-	-	-
3800174	AC	A	MRSN4605_03503	1	bacA	NP_250649.1	bacitracin resistance protein	del	frameshift_variant	HIGH	p.Val135fs	2	2	0	-	-	-	-	-	-	-	-	-	-	-	-	-	-	-	-	-	-	-	-	-	-	-	-	-	-	-	-	-	-	-	-	-	-	-
153742	G	C	MRSN4605_00134	1	bauD	NP_248819.1	Amino acid permease	snp	missense_variant	MODERATE	p.Ala340Gly	1	1	0	-	-	-	-	-	-	-	-	-	-	-	-	-	-	-	-	-	-	-	-	-	-	-	-	-	-	-	-	-	-	-	-	-	-	-
4607372	G	T	MRSN4605_04322	1	bepA_1		Beta-barrel assembly-enhancing protease	snp	missense_variant	MODERATE	p.Asp449Tyr	17	17	0	+	+	+	+	+	+	+	+	+	+	+	-	-	+	+	-	-	-	-	-	-	-	-	-	-	-	-	-	-	-	-	-	+	-	-
6781074	G	T	MRSN4605_06326	1	betT2_2	NP_253978.1	BetT2	snp	missense_variant	MODERATE	p.Val192Phe	31	0	31	-	-	-	-	-	-	-	-	-	-	-	-	-	-	-	-	-	-	-	-	-	-	-	-	-	-	-	-	-	-	-	-	-	-	-
957737	G	A	MRSN4605_00918	1	bfmS	NP_252791.1	BfmS	snp	missense_variant	MODERATE	p.Pro205Leu	6	6	0	-	-	-	-	-	-	-	-	-	-	-	-	-	-	-	-	-	-	-	-	-	-	-	-	-	-	-	-	-	-	-	-	-	-	-
5242738	T	A	MRSN4605_04909	1	cefD		Isopenicillin N epimerase	snp	missense_variant	MODERATE	p.Leu290Gln	2	2	0	-	-	-	-	-	-	-	-	-	-	-	-	-	-	-	-	-	-	-	+	-	-	-	-	-	+	-	-	-	-	-	-	-	-	-
1754547	G	A	MRSN4605_01637	1	cidA_2		Holin-like protein CidA	snp	missense_variant	MODERATE	p.Gly43Ser	3	0	3	-	-	-	-	-	-	-	-	-	-	-	-	-	-	-	-	-	-	-	-	-	-	-	-	-	-	-	-	-	-	-	-	-	-	-
2781605	A	G	MRSN4605_02638	1	clpA	NP_251310.1	ATP-binding protease component ClpA	snp	missense_variant	MODERATE	p.Gln430Arg	2	2	0	-	-	-	-	-	-	-	-	-	-	-	-	-	-	-	-	-	-	-	-	-	-	-	-	-	-	-	-	-	-	-	-	-	-	-
116262	G	A	MRSN4605_00094	1	clpV1	NP_248780.1	ClpV1	snp	missense_variant	MODERATE	p.Ala262Thr	1	0	1	-	-	-	-	-	-	-	-	-	-	-	-	-	-	-	-	-	-	-	-	-	-	-	-	-	-	-	-	-	-	-	-	-	-	-
4248644	C	CAGCGCCGGCTTGAAATGCCGGCTG	MRSN4605_03993	1	clpV2	NP_250353.1	clpV2	ins	disruptive_inframe_insertion	MODERATE	p.Leu768_Leu769insSerArgHisPheLysProAlaLeu	1	1	0	-	-	-	-	-	-	-	-	-	-	-	-	-	-	-	-	-	-	-	-	-	-	-	-	-	-	-	-	-	-	-	-	-	-	-
3908796	T	C	MRSN4605_03594	1	cmaX_1	NP_250464.1	CmaX protein	snp	missense_variant	MODERATE	p.Leu253Pro	1	0	1	-	-	-	-	-	-	-	-	-	-	-	-	-	-	-	-	-	-	-	-	-	-	-	-	-	-	-	-	-	-	-	-	-	-	-
2058370	G	A	MRSN4605_01926	1	cmk	NP_251853.1	cytidylate kinase	snp	missense_variant	MODERATE	p.Ala59Thr	3	0	3	-	-	-	-	-	-	-	-	-	-	-	-	-	-	-	-	-	-	-	-	-	-	-	-	-	-	-	-	-	-	-	-	-	-	-
2343643	C	T	MRSN4605_02199	1	cobN	NP_251634.1	cobalamin biosynthetic protein CobN	snp	missense_variant	MODERATE	p.Arg365Cys	1	0	1	-	-	-	-	-	-	-	-	-	-	-	-	-	-	-	-	-	-	-	-	-	-	-	-	-	-	-	-	-	-	-	-	-	-	-
5627597	ACG	T	MRSN4605_05262	1	colR	NP_253071.1	two-component response regulator ColR	complex	frameshift_variant&missense_variant	HIGH	p.Val49fs	1	1	0	-	-	-	-	-	-	-	-	-	-	-	-	-	-	-	-	-	-	-	-	-	-	-	-	-	-	-	-	-	-	-	-	-	-	-
2483445	A	G	MRSN4605_02339	1	copS_1	NP_251500.1	two-component sensor%2C CopS	snp	missense_variant	MODERATE	p.Val26Ala	8	8	0	-	-	-	-	-	-	-	-	-	-	-	-	-	-	-	-	-	-	-	-	-	-	-	-	-	-	-	-	-	+	+	-	-	+	+
2012312	C	T	MRSN4605_01882	1	cpxS	NP_251896.1	CpxS	snp	missense_variant	MODERATE	p.Arg240His	1	1	0	-	-	-	-	-	-	-	-	-	-	-	-	-	-	-	-	-	-	-	-	-	-	-	-	-	-	-	-	-	-	-	-	-	-	-
3598724	G	A	MRSN4605_03327	1	cupA5	NP_250822.1	chaperone CupA5	snp	missense_variant	MODERATE	p.Pro94Ser	5	5	0	-	-	-	-	-	-	-	-	-	-	-	-	-	-	-	-	-	-	-	-	-	-	-	-	-	-	-	-	-	-	-	-	-	-	-
982258	G	T	MRSN4605_00939	1	cupB5	NP_252771.1	adhesive protein CupB5	snp	missense_variant	MODERATE	p.Gly874Cys	2	2	0	-	-	-	-	-	-	-	-	-	-	-	-	-	-	-	-	-	-	-	+	-	-	-	-	-	+	-	-	-	-	-	-	-	-	-
6023440	T	C	MRSN4605_05650	1	cupE5	NP_253341.1	Fimbrial usher protein CupE5	snp	missense_variant	MODERATE	p.Tyr360His	1	0	1	-	-	-	-	-	-	-	-	-	-	-	-	-	-	-	-	-	-	-	-	-	-	-	-	-	-	-	-	-	-	-	-	-	-	-
4536246	C	T	MRSN4605_04253	1	cysP	NP_250184.1	sulfate-binding protein of ABC transporter	snp	missense_variant	MODERATE	p.Pro297Ser	1	0	1	-	-	-	-	-	-	-	-	-	-	-	-	-	-	-	-	-	-	-	-	-	-	-	-	-	-	-	-	-	-	-	-	-	-	-
3035588	G	C	MRSN4605_02879	1	czcC_2	NP_251212.1	outer membrane protein precursor CzcC	snp	missense_variant	MODERATE	p.Gln195His	8	8	0	-	-	-	-	-	-	-	-	-	-	-	-	-	-	-	-	-	-	-	-	-	-	-	-	-	-	-	-	-	+	+	-	-	+	+
4785600	A	G	MRSN4605_04484	1	dctA	NP_249874.1	C4-dicarboxylate transport protein	snp	missense_variant	MODERATE	p.Val362Ala	1	1	0	-	-	-	-	-	-	-	-	-	-	-	-	-	-	-	-	-	-	-	-	-	-	-	-	-	-	-	-	-	-	-	-	-	-	-
7005932	CA	TT	MRSN4605_06532	1	dgcH	NP_254174.1	DgcH	complex	missense_variant	MODERATE	p.Leu264Gln	6	6	0	-	-	-	-	-	-	-	-	-	-	-	-	-	-	-	-	-	-	-	-	+	+	+	+	+	-	-	+	-	-	-	-	-	-	-
7057646	G	C	MRSN4605_06582	1	dksA2	NP_254223.1	DksA2	snp	missense_variant	MODERATE	p.Leu78Val	4	4	0	-	-	-	-	-	-	-	-	-	-	-	-	-	-	-	-	-	-	-	-	-	-	-	-	-	-	-	-	-	-	-	-	-	-	-
3241109	G	T	MRSN4605_03008	1	dltA		D-alanine--D-alanyl carrier protein ligase	snp	missense_variant	MODERATE	p.Val3995Leu	1	1	0	-	-	-	-	-	-	-	-	-	-	-	-	-	-	-	+	-	-	-	-	-	-	-	-	-	-	-	-	-	-	-	-	-	-	-
888943	A	G	MRSN4605_00843	1	dnaC		DNA replication protein DnaC	snp	missense_variant	MODERATE	p.Asp107Gly	3	3	0	-	-	-	-	-	-	-	-	-	-	-	-	-	-	-	-	-	-	-	-	-	-	-	-	-	-	-	-	-	-	-	-	-	+	+
6152093	G	A	MRSN4605_05768	1	dnaK	NP_253449.1	DnaK protein	snp	missense_variant	MODERATE	p.Ala607Val	1	0	1	-	-	-	-	-	-	-	-	-	-	-	-	-	-	-	-	-	-	-	-	-	-	-	-	-	-	-	-	-	-	-	-	-	-	-
4398956	CGGCTCGGGCTCG	C,CGGCTCGGGCTCGGGCTCG	MRSN4605_04131	1	dnaX	NP_250223.1	DNA polymerase subunits gamma and tau	del	disruptive_inframe_deletion	MODERATE	p.Glu471_Pro474del	3	0	3	-	-	-	-	-	-	-	-	-	-	-	-	-	-	-	-	-	-	-	-	-	-	-	-	-	-	-	-	-	-	-	-	-	-	-
6423545	T	C	MRSN4605_06018	1	dnpA	NP_253689.1	de-N-acetylase involved in persistence%2C DnpA	snp	missense_variant	MODERATE	p.Asp191Gly	1	0	1	-	-	-	-	-	-	-	-	-	-	-	-	-	-	-	-	-	-	-	-	-	-	-	-	-	-	-	-	-	-	-	-	-	-	-
5752140	C	T	MRSN4605_05383	1	dppA3	NP_253190.1	putative binding protein component of ABC transporter	snp	missense_variant	MODERATE	p.Arg60Cys	6	6	0	-	-	-	-	-	-	-	-	-	-	-	-	-	-	-	-	-	-	-	-	+	+	+	+	+	-	-	+	-	-	-	-	-	-	-
80517	G	T	MRSN4605_00062	1	dsbM_1	NP_248748.1	DsbM	snp	missense_variant	MODERATE	p.Gly198Cys	8	0	8	-	-	-	-	-	-	-	-	-	-	-	-	-	-	-	-	-	-	-	-	-	-	-	-	-	-	-	-	-	-	-	-	-	-	-
1832821	G	A	MRSN4605_01718	1	dsdA	NP_252047.1	D-serine dehydratase	snp	missense_variant	MODERATE	p.Ala48Val	2	0	2	-	-	-	-	-	-	-	-	-	-	-	-	-	-	-	-	-	-	-	-	-	-	-	-	-	-	-	-	-	-	-	-	-	-	-
3781219	G	A	MRSN4605_03486	1	ercS'	NP_250666.1	ErcS'	snp	missense_variant	MODERATE	p.Arg754Cys	1	0	1	-	-	-	-	-	-	-	-	-	-	-	-	-	-	-	-	-	-	-	-	-	-	-	-	-	-	-	-	-	-	-	-	-	-	-
3537679	C	G	MRSN4605_03269	1	exoY	NP_250881.1	adenylate cyclase ExoY	snp	missense_variant	MODERATE	p.Leu21Val	5	0	5	-	-	-	-	-	-	-	-	-	-	-	-	-	-	-	-	-	-	-	-	-	-	-	-	-	-	-	-	-	-	-	-	-	-	-
4204996	T	C	MRSN4605_03943	1	exsB	NP_250403.1	exoenzyme S synthesis protein B	snp	missense_variant	MODERATE	p.Gln50Arg	1	1	0	-	-	-	-	-	-	-	-	-	-	-	-	-	-	-	-	-	-	-	-	-	-	-	-	-	-	-	-	-	-	-	-	-	-	-
4202802	G	A	MRSN4605_03941	1	exsD	NP_250405.1	ExsD	snp	missense_variant	MODERATE	p.Pro233Leu	1	0	1	-	-	-	-	-	-	-	-	-	-	-	-	-	-	-	-	-	-	-	-	-	-	-	-	-	-	-	-	-	-	-	-	-	-	-
2322909	C	A	MRSN4605_02177	1	fabF1	NP_251655.1	beta-ketoacyl-acyl carrier protein synthase II	snp	missense_variant	MODERATE	p.Pro273Thr	3	0	3	-	-	-	-	-	-	-	-	-	-	-	-	-	-	-	-	-	-	-	-	-	-	-	-	-	-	-	-	-	-	-	-	-	-	-
1242186	G	A	MRSN4605_01176	1	fecA	NP_252590.1	Fe(III) dicitrate transport protein FecA	snp	missense_variant	MODERATE	p.Ala342Val	3	0	3	-	-	-	-	-	-	-	-	-	-	-	-	-	-	-	-	-	-	-	-	-	-	-	-	-	-	-	-	-	-	-	-	-	-	-
850513	TG	T	MRSN4605_00797	1	fepB	NP_252848.1	ferrienterobactin-binding periplasmic protein precursor FepB	del	frameshift_variant	HIGH	p.Gln199fs	7	0	7	-	-	-	-	-	-	-	-	-	-	-	-	-	-	-	-	-	-	-	-	-	-	-	-	-	-	-	-	-	-	-	-	-	-	-
106147	CTGGCTG	C	MRSN4605_00085	1	fha1	NP_248771.1	Fha1	del	conservative_inframe_deletion	MODERATE	p.Gln288_Pro289del	2	2	0	-	-	-	-	-	-	-	-	-	-	-	-	-	-	-	-	-	-	-	-	-	-	-	-	-	-	-	-	-	-	-	-	-	-	-
4245669	C	T	MRSN4605_03990	1	fha2	NP_250356.1	Fha2	snp	missense_variant	MODERATE	p.Glu295Lys	4	0	4	-	-	-	-	-	-	-	-	-	-	-	-	-	-	-	-	-	-	-	-	-	-	-	-	-	-	-	-	-	-	-	-	-	-	-
2730206	T	G	MRSN4605_02591	1	fhpR##	NP_251355.1	Transcriptional activator of P. aeruginosa flavohemoglobin%2C FhpR	snp	missense_variant	MODERATE	p.Thr257Pro	2	2	0	-	-	-	-	-	-	-	-	-	-	-	-	-	-	-	-	-	-	-	-	-	-	-	-	-	-	-	-	-	-	-	-	-	-	-
4898203	G	T	MRSN4605_04584	1	flgJ	NP_249776.1	flagellar protein FlgJ	snp	missense_variant	MODERATE	p.Ala302Asp	2	2	0	-	-	-	-	-	-	-	-	-	-	-	-	-	-	-	-	-	-	-	+	-	-	-	-	-	+	-	-	-	-	-	-	-	-	-
4575264	G	A	MRSN4605_04295	1	flhA	NP_250143.1	flagellar biosynthesis protein FlhA	snp	stop_gained	HIGH	p.Gln390*	1	1	0	-	-	-	-	-	-	-	-	-	-	-	-	-	-	-	-	-	-	-	-	-	-	-	-	-	-	-	-	-	-	-	-	-	-	-
4571744	TGGCGCCCTTGCC	T	MRSN4605_04292	1	fliA	NP_250146.1	sigma factor FliA	del	conservative_inframe_deletion	MODERATE	p.Gly60_Ala63del	1	0	1	-	-	-	-	-	-	-	-	-	-	-	-	-	-	-	-	-	-	-	-	-	-	-	-	-	-	-	-	-	-	-	-	-	-	-
4581829	G	A	MRSN4605_04301	1	fliP	NP_250137.1	flagellar biosynthetic protein FliP	snp	missense_variant	MODERATE	p.Ala149Val	8	8	0	-	-	-	-	-	-	-	-	-	-	-	-	-	-	-	-	-	-	-	-	-	-	-	-	-	-	-	-	-	+	+	-	-	+	+
775592	C	T	MRSN4605_00729	1	fptA	NP_252911.1	Fe(III)-pyochelin outer membrane receptor precursor	snp	missense_variant	MODERATE	p.Ser698Phe	4	0	4	-	-	-	-	-	-	-	-	-	-	-	-	-	-	-	-	-	-	-	-	-	-	-	-	-	-	-	-	-	-	-	-	-	-	-
835295	A	G	MRSN4605_00782	1	fpvB_1	NP_252857.1	second ferric pyoverdine receptor FpvB	snp	missense_variant	MODERATE	p.Tyr412His	2	2	0	-	-	-	-	-	-	-	-	-	-	-	-	-	-	-	-	-	-	-	-	-	-	-	-	-	-	-	-	-	-	-	-	-	-	-
3244661	GCTA	G	MRSN4605_03009	1	fpvB_2	NP_252857.1	second ferric pyoverdine receptor FpvB	del	conservative_inframe_deletion	MODERATE	p.Tyr754del	2	2	0	-	-	-	-	-	-	-	-	-	-	-	-	-	-	-	-	-	-	-	-	-	-	-	-	-	-	-	-	-	-	-	-	-	-	-
421452	C	T	MRSN4605_00380	1	ftsE	NP_249065.1	cell division protein FtsE	snp	missense_variant	MODERATE	p.Arg150Cys	10	0	10	-	-	-	-	-	-	-	-	-	-	-	-	-	-	-	-	-	-	-	-	-	-	-	-	-	-	-	-	-	-	-	-	-	-	-
2109980	GGC	G	MRSN4605_01977	1	ftsN_1		Cell division protein FtsN	del	frameshift_variant	HIGH	p.Ala158fs	1	1	0	-	-	-	-	-	-	-	-	-	-	-	-	-	-	-	-	-	-	-	-	-	-	-	-	-	-	-	-	-	-	-	-	-	-	-
5714644	T	C	MRSN4605_05353	1	fumC1	NP_253160.1	fumarate hydratase	snp	missense_variant	MODERATE	p.Gln63Arg	8	8	0	-	-	-	-	-	-	-	-	-	-	-	-	-	-	-	-	-	-	-	-	-	-	-	-	-	-	-	-	-	+	+	-	-	+	+
5136113	C	T	MRSN4605_04827	1	fumC2	NP_249545.1	fumarate hydratase	snp	missense_variant	MODERATE	p.Ala435Val	1	0	1	-	-	-	-	-	-	-	-	-	-	-	-	-	-	-	-	-	-	-	-	-	-	-	-	-	-	-	-	-	-	-	-	-	-	-
853257	A	T	MRSN4605_00800	1	fvbA	NP_252845.1	FvbA	snp	missense_variant	MODERATE	p.Thr59Ser	1	0	1	-	-	-	-	-	-	-	-	-	-	-	-	-	-	-	-	-	-	-	-	-	-	-	-	-	-	-	-	-	-	-	-	-	-	-
6914837	T	A	MRSN4605_06455	1	gbcB	NP_254098.1	GbcB	snp	missense_variant	MODERATE	p.Tyr350Asn	1	0	1	-	-	-	-	-	-	-	-	-	-	-	-	-	-	-	-	-	-	-	-	-	-	-	-	-	-	-	-	-	-	-	-	-	-	-
1214467	C	T	MRSN4605_01154	1	gbt_1	NP_251772.1	glycine betaine transmethylase	snp	missense_variant	MODERATE	p.Ser71Phe	11	11	0	-	-	-	-	-	-	-	-	-	-	-	-	-	-	-	-	-	-	-	-	-	-	-	-	-	-	-	-	-	-	-	-	-	-	-
3141344	G	C	MRSN4605_02952	1	gcvP2	NP_251135.1	glycine cleavage system protein P2	snp	missense_variant	MODERATE	p.Val306Leu	116	0	116	-	-	-	-	-	-	-	-	-	-	-	-	-	-	-	-	-	-	-	-	-	-	-	-	-	-	-	-	-	-	-	-	-	-	-
2164186	G	A	MRSN4605_02022	1	gdhB	NP_251758.1	NAD-dependent glutamate dehydrogenase	snp	missense_variant	MODERATE	p.Val1567Ile	4	4	0	-	-	-	-	-	-	-	-	-	-	-	-	-	-	-	-	-	-	-	-	-	-	-	-	-	-	-	-	-	-	-	-	-	-	-
7085735	C	T	MRSN4605_06611	1	gidA	NP_254252.1	glucose-inhibited division protein A	snp	missense_variant	MODERATE	p.Gly492Ser	1	1	0	-	-	-	-	-	-	-	-	-	-	-	-	-	-	-	-	-	-	+	-	-	-	-	-	-	-	-	-	-	-	-	-	-	-	-
2136300	C	G	MRSN4605_02004	1	glpG		Rhomboid protease GlpG	snp	missense_variant	MODERATE	p.Ala157Gly	6	0	6	-	-	-	-	-	-	-	-	-	-	-	-	-	-	-	-	-	-	-	-	-	-	-	-	-	-	-	-	-	-	-	-	-	-	-
6471476	G	A	MRSN4605_06052	1	gltB	NP_253723.1	glutamate synthase large chain precursor	snp	missense_variant	MODERATE	p.Arg1254Cys	2	2	0	-	-	-	-	-	-	-	-	-	-	-	-	-	-	-	-	-	-	-	-	-	-	-	-	-	-	-	-	-	-	-	-	-	-	-
2084975	G	C	MRSN4605_01949	1	gltX	NP_251824.1	glutamyl-tRNA synthetase	snp	missense_variant	MODERATE	p.Glu316Asp	1	1	0	-	-	-	-	-	-	-	-	-	-	-	-	-	-	-	-	-	-	-	-	-	-	-	-	-	-	-	-	-	-	-	-	-	-	-
3341175	C	T	MRSN4605_03087	1	gntR	NP_251010.1	transcriptional regulator GntR	snp	missense_variant	MODERATE	p.Ala330Val	1	1	0	-	-	-	-	-	-	-	-	-	-	-	-	-	-	-	-	-	-	-	-	-	-	-	-	-	-	-	-	-	-	-	-	-	-	-
3726690	C	T	MRSN4605_03435	1	gor	NP_250715.1	glutathione reductase	snp	missense_variant	MODERATE	p.Gly175Asp	1	0	1	-	-	-	-	-	-	-	-	-	-	-	-	-	-	-	-	-	-	-	-	-	-	-	-	-	-	-	-	-	-	-	-	-	-	-
5630530	T	A	MRSN4605_05267	1	groEL	NP_253075.1	GroEL protein	snp	missense_variant	MODERATE	p.Gln505Leu	2	2	0	-	-	-	-	-	-	-	-	-	-	-	-	-	+	+	-	-	-	-	-	-	-	-	-	-	-	-	-	-	-	-	-	-	-	-
1776653	G	T	MRSN4605_01661	1	hasS	NP_252099.1	HasS	snp	stop_gained	HIGH	p.Glu6*	1	0	1	-	-	-	-	-	-	-	-	-	-	-	-	-	-	-	-	-	-	-	-	-	-	-	-	-	-	-	-	-	-	-	-	-	-	-
4387748	C	T	MRSN4605_04117	1	hemN	NP_250237.1	oxygen-independent coproporphyrinogen III oxidase	snp	missense_variant	MODERATE	p.Pro449Leu	1	0	1	-	-	-	-	-	-	-	-	-	-	-	-	-	-	-	-	-	-	-	-	-	-	-	-	-	-	-	-	-	-	-	-	-	-	-
6063848	T	G	MRSN4605_05687	1	hitB	NP_253377.1	iron (III)-transport system permease HitB	snp	missense_variant	MODERATE	p.Phe119Val	1	1	0	-	-	-	-	-	-	-	-	-	-	-	-	-	-	-	-	-	-	-	-	-	-	-	-	-	-	-	-	-	-	-	-	-	-	-
14308	G	A	MRSN4605_00011	1	htrB1	NP_248701.1	acyltransferase HtrB1	snp	missense_variant	MODERATE	p.Gly28Glu	1	1	0	-	-	-	-	-	-	-	-	-	-	-	-	-	-	-	-	-	-	-	-	-	-	-	-	-	-	-	-	-	-	-	-	-	-	-
286480	G	T	MRSN4605_00254	1	hudA	NP_248945.1	HudA	snp	missense_variant	MODERATE	p.Gln157Lys	3	0	3	-	-	-	-	-	-	-	-	-	-	-	-	-	-	-	-	-	-	-	-	-	-	-	-	-	-	-	-	-	-	-	-	-	-	-
6548027	C	T	MRSN4605_06116	1	hutU	NP_253787.1	urocanase	snp	missense_variant	MODERATE	p.Gly510Ser	1	0	1	-	-	-	-	-	-	-	-	-	-	-	-	-	-	-	-	-	-	-	-	-	-	-	-	-	-	-	-	-	-	-	-	-	-	-
4239370	C	T	MRSN4605_03986	1	icmF2	NP_250360.1	IcmF2	snp	stop_gained	HIGH	p.Trp1087*	3	0	3	-	-	-	-	-	-	-	-	-	-	-	-	-	-	-	-	-	-	-	-	-	-	-	-	-	-	-	-	-	-	-	-	-	-	-
5972792	T	G	MRSN4605_05606	1	katB	NP_253303.1	catalase	snp	missense_variant	MODERATE	p.Thr364Pro	4	4	0	-	-	-	-	-	-	-	-	-	-	-	-	-	-	-	-	-	-	-	-	-	-	-	-	-	-	-	-	-	-	-	-	-	-	-
3584567	C	G	MRSN4605_03309	1	katE	NP_250837.1	catalase HPII	snp	missense_variant	MODERATE	p.Val126Leu	17	17	0	+	+	+	+	+	+	+	+	+	+	+	-	-	+	+	-	-	-	-	-	-	-	-	-	-	-	-	-	-	-	-	-	+	-	-
4764356	G	A	MRSN4605_04460	1	kefB	NP_249898.1	glutathione-regulated potassium-efflux system protein KefB	snp	missense_variant	MODERATE	p.His261Tyr	9	9	0	-	-	-	-	-	-	-	-	-	-	-	-	-	-	-	-	-	-	-	-	-	-	-	-	-	-	+	-	+	-	-	+	-	-	-
5481310	A	AG	MRSN4605_05132	1	lapA	NP_249379.1	low-molecular-weight alkaline phosphatase A%2C LapA	ins	frameshift_variant	HIGH	p.Tyr97fs	10	0	10	-	-	-	-	-	-	-	-	-	-	-	-	-	-	-	-	-	-	-	-	-	-	-	-	-	-	-	-	-	-	-	-	-	-	-
5612361	T	A	MRSN4605_05250	1	lemA		Protein LemA	snp	missense_variant	MODERATE	p.Lys186Met	2	0	2	-	-	-	-	-	-	-	-	-	-	-	-	-	-	-	-	-	-	-	-	-	-	-	-	-	-	-	-	-	-	-	-	-	-	-
2099355	T	C	MRSN4605_01969	1	leuB	NP_251808.1	3-isopropylmalate dehydrogenase	snp	missense_variant	MODERATE	p.Leu60Pro	2	0	2	-	-	-	-	-	-	-	-	-	-	-	-	-	-	-	-	-	-	-	-	-	-	-	-	-	-	-	-	-	-	-	-	-	-	-
4696759	A	T	MRSN4605_04402	1	lhpB	NP_249958.1	D-hydroxyproline dehydrogenase beta-subunit%2C LphB	snp	missense_variant	MODERATE	p.Ile141Phe	5	5	0	-	-	-	-	-	-	-	-	-	-	-	-	-	-	-	-	-	-	-	-	-	-	-	-	-	-	-	-	-	-	-	-	-	-	-
4711545	C	A	MRSN4605_04417	1	lhpG	NP_249944.1	alpha-ketoglutaric semialdehyde dehydrogenase%2C LhpG	snp	missense_variant	MODERATE	p.Arg15Ser	34	10	24	-	-	-	-	-	-	+	-	-	-	-	-	-	-	+	-	-	-	-	-	-	-	-	-	+	-	-	-	-	-	-	-	-	-	-
4402154	C	T	MRSN4605_04134	1	lig	NP_250220.1	DNA ligase	snp	missense_variant	MODERATE	p.Ala747Thr	31	0	31	-	-	-	-	-	-	-	-	-	-	-	-	-	-	-	-	-	-	-	-	-	-	-	-	-	-	-	-	-	-	-	-	-	-	-
3591563	G	A	MRSN4605_03320	1	ligD	NP_250828.1	Multifunctional non-homologous end joining protein LigD	snp	missense_variant	MODERATE	p.Arg750Cys	8	8	0	-	-	-	-	-	-	-	-	-	-	-	-	-	-	-	-	-	-	-	-	-	-	-	-	-	-	-	-	-	+	+	-	-	+	+
3741709	G	C	MRSN4605_03449	1	liuD	NP_250702.1	methylcrotonyl-CoA carboxylase%2C alpha-subunit (biotin-containing)	snp	missense_variant	MODERATE	p.Gly155Ala	8	8	0	-	-	-	-	-	-	-	-	-	-	-	-	-	-	-	-	-	-	+	-	+	+	+	+	+	-	-	+	-	-	-	-	-	-	-
2300883	GTCC	G	MRSN4605_02154	1	lolE	NP_251678.1	lipoprotein localization protein LolE	del	conservative_inframe_deletion	MODERATE	p.Leu339del	1	0	1	-	-	-	-	-	-	-	-	-	-	-	-	-	-	-	-	-	-	-	-	-	-	-	-	-	-	-	-	-	-	-	-	-	-	-
6223865	C	T	MRSN4605_05840	1	lpd3	NP_253516.1	dihydrolipoamide dehydrogenase 3	snp	missense_variant	MODERATE	p.Glu297Lys	1	0	1	-	-	-	-	-	-	-	-	-	-	-	-	-	-	-	-	-	-	-	-	-	-	-	-	-	-	-	-	-	-	-	-	-	-	-
1526932	A	C	MRSN4605_01440	1	lpxB	NP_252333.1	lipid A-disaccharide synthase	snp	missense_variant	MODERATE	p.Lys107Thr	3	3	0	-	-	-	-	-	-	-	-	-	-	-	-	-	-	-	-	-	-	-	-	-	-	-	-	-	-	-	-	-	-	-	-	-	-	-
6671264	G	A	MRSN4605_06226	1	lpxT		Lipid A 1-diphosphate synthase	snp	stop_gained	HIGH	p.Trp30*	1	1	0	-	-	-	-	-	-	-	-	-	-	-	-	-	-	-	-	-	-	-	-	-	-	-	-	-	-	-	-	-	-	-	-	-	-	-
5907802	G	A	MRSN4605_05548	1	lytB	NP_253247.1	LytB protein	snp	missense_variant	MODERATE	p.Ala94Val	1	0	1	-	-	-	-	-	-	-	-	-	-	-	-	-	-	-	-	-	-	-	-	-	-	-	-	-	-	-	-	-	-	-	-	-	-	-
5737607	T	C	MRSN4605_05372	1	magD	NP_253179.1	MagD	snp	missense_variant	MODERATE	p.Gln755Arg	1	1	0	-	-	-	-	-	-	-	-	-	-	-	-	-	-	-	-	-	-	-	-	-	-	-	-	-	-	-	-	-	-	-	-	-	-	-
4860321	G	A	MRSN4605_04551	1	mdoB		Phosphoglycerol transferase I	snp	missense_variant	MODERATE	p.Asp189Asn	1	1	0	-	-	-	-	-	-	-	-	-	-	-	-	-	-	-	-	-	-	-	-	-	-	-	-	-	-	-	-	-	-	-	-	-	-	-
3071320	G	A	MRSN4605_02910	1	mexS	NP_251181.1	MexS	snp	missense_variant	MODERATE	p.Gly129Ser	1	0	1	-	-	-	-	-	-	-	-	-	-	-	-	-	-	-	-	-	-	-	-	-	-	-	-	-	-	-	-	-	-	-	-	-	-	-
5622271	G	A	MRSN4605_05256	1	mexW	NP_253065.1	Resistance-Nodulation-Cell Division (RND) multidrug efflux transporter MexW	snp	missense_variant	MODERATE	p.Gly903Ser	3	0	3	-	-	-	-	-	-	-	-	-	-	-	-	-	-	-	-	-	-	-	-	-	-	-	-	-	-	-	-	-	-	-	-	-	-	-
1977192	G	A	MRSN4605_01844	1	minD	NP_251934.1	cell division inhibitor MinD	snp	missense_variant	MODERATE	p.Thr17Ile	4	0	4	-	-	-	-	-	-	-	-	-	-	-	-	-	-	-	-	-	-	-	-	-	-	-	-	-	-	-	-	-	-	-	-	-	-	-
5317864	C	T	MRSN4605_04977	1	mmsR_2	NP_252261.1	transcriptional regulator MmsR	snp	missense_variant	MODERATE	p.Gly86Asp	1	0	1	-	-	-	-	-	-	-	-	-	-	-	-	-	-	-	-	-	-	-	-	-	-	-	-	-	-	-	-	-	-	-	-	-	-	-
4521630	CCGGCGGCCTTCAGCT	C	MRSN4605_04241	1	moaA2	NP_250196.1	molybdopterin biosynthetic protein A2	del	disruptive_inframe_deletion	MODERATE	p.Glu110_Ala114del	2	2	0	-	-	-	-	-	-	-	-	-	-	-	-	-	-	-	-	-	-	-	-	-	-	-	-	-	-	-	-	-	-	-	-	-	-	-
1227135	C	T	MRSN4605_01163	1	moeA1	NP_252603.1	molybdenum cofactor biosynthetic protein A1	snp	missense_variant	MODERATE	p.Pro26Leu	2	2	0	-	-	-	-	-	-	-	-	-	-	-	-	-	-	-	-	-	-	-	-	-	-	-	-	-	-	-	-	-	-	-	-	-	-	-
6361400	C	T	MRSN4605_05968	1	motB	NP_253640.1	chemotaxis protein MotB	snp	missense_variant	MODERATE	p.Ala231Thr	1	1	0	-	-	-	-	-	-	-	-	-	-	-	-	-	-	-	-	-	-	-	-	-	-	-	-	-	-	-	-	-	-	-	-	-	-	-
921840	A	G	MRSN4605_00887	1	mpaR	NP_252821.1	MpaR	snp	missense_variant	MODERATE	p.Ser497Pro	1	0	1	-	-	-	-	-	-	-	-	-	-	-	-	-	-	-	-	-	-	-	-	-	-	-	-	-	-	-	-	-	-	-	-	-	-	-
5301401	G	C	MRSN4605_04960	1	mucB	NP_249455.1	negative regulator for alginate biosynthesis MucB	snp	stop_gained	HIGH	p.Tyr119*	1	0	1	-	-	-	-	-	-	-	-	-	-	-	-	-	-	-	-	-	-	-	-	-	-	-	-	-	-	-	-	-	-	-	-	-	-	-
1552990	C	G	MRSN4605_01463	1	mutS	NP_252310.1	DNA mismatch repair protein MutS	snp	missense_variant	MODERATE	p.Gly427Ala	8	8	0	-	-	-	-	-	-	-	-	-	-	-	-	-	-	-	-	-	-	-	-	-	-	-	-	-	-	-	-	+	-	-	+	-	-	-
4798916	A	T	MRSN4605_04495	1	napC	NP_249863.1	cytochrome c-type protein NapC	snp	missense_variant	MODERATE	p.Ser173Cys	1	1	0	-	-	-	-	-	-	-	-	-	-	-	-	-	-	-	-	-	-	-	-	-	-	-	-	-	-	-	-	-	-	-	-	-	-	-
1264677	T	C	MRSN4605_01201	1	narL	NP_252568.1	two-component response regulator NarL	snp	missense_variant	MODERATE	p.Thr160Ala	45	0	45	-	-	-	-	-	-	-	-	-	-	-	-	-	-	-	-	-	-	-	-	-	-	-	-	-	-	-	-	-	-	-	-	-	-	-
5958202	G	A	MRSN4605_05593	1	nfxB	NP_253290.1	transcriptional regulator NfxB	snp	missense_variant	MODERATE	p.Arg163Gln	1	1	0	-	-	-	-	-	-	-	-	-	-	-	-	-	-	-	-	-	-	-	-	-	-	-	-	-	-	-	-	-	-	-	-	-	-	-
1258145	C	T	MRSN4605_01191	1	nhaP	NP_252576.1	Na+/H+ antiporter NhaP	snp	missense_variant	MODERATE	p.Ser67Phe	1	0	1	-	-	-	-	-	-	-	-	-	-	-	-	-	-	-	-	-	-	-	-	-	-	-	-	-	-	-	-	-	-	-	-	-	-	-
3975378	T	A	MRSN4605_03660	1	nppA1	NP_250502.1	NppA1	snp	missense_variant	MODERATE	p.Tyr287Asn	3	0	3	-	-	-	-	-	-	-	-	-	-	-	-	-	-	-	-	-	-	-	-	-	-	-	-	-	-	-	-	-	-	-	-	-	-	-
3054417	G	C	MRSN4605_02896	1	opdT	NP_251195.1	tyrosine porin OpdT	snp	missense_variant	MODERATE	p.Trp10Ser	51	0	51	-	-	-	-	-	-	-	-	-	-	-	-	-	-	-	-	-	-	-	-	-	-	-	-	-	-	-	-	-	-	-	-	-	-	-
6521351	T	TGGC	MRSN4605_06094	1	opgH	NP_253764.1	OpgH	ins	conservative_inframe_insertion	MODERATE	p.Ala395dup	2	2	0	-	-	-	-	-	-	-	-	-	-	-	-	-	-	-	-	-	-	-	-	-	-	-	-	-	-	-	-	-	-	-	-	-	-	-
3254708	G	A	MRSN4605_03016	1	opmQ	NP_251081.1	putative outer membrane protein precursor	snp	missense_variant	MODERATE	p.Ala99Val	5	5	0	-	-	-	-	-	-	-	-	-	-	-	-	-	-	-	-	-	-	-	-	-	-	-	-	-	-	-	-	-	-	-	-	-	-	-
329426	T	C	MRSN4605_00291	1	oprE	NP_248982.1	Anaerobically-induced outer membrane porin OprE precursor	snp	missense_variant	MODERATE	p.Leu457Pro	5	5	0	-	-	-	-	-	-	-	-	-	-	-	-	-	-	-	-	-	-	-	-	-	-	-	-	-	-	-	-	-	-	-	-	-	-	-
998692	ACGCCCAGGCCGCCGTAGGGCTGGAAGGCGCTGTTGGTAC	A	MRSN4605_00955	1	oprG	NP_252756.1	Outer membrane protein OprG precursor	del	disruptive_inframe_deletion	MODERATE	p.Gly128_Gly140del	3	0	3	-	-	-	-	-	-	-	-	-	-	-	-	-	-	-	-	-	-	-	-	-	-	-	-	-	-	-	-	-	-	-	-	-	-	-
5953202	A	T	MRSN4605_05590	1	oprJ	NP_253287.1	Multidrug efflux outer membrane protein OprJ precursor	snp	missense_variant	MODERATE	p.Ser9Thr	10	0	10	-	-	-	-	-	-	-	-	-	-	-	-	-	-	-	-	-	-	-	-	-	-	-	-	-	-	-	-	-	-	-	-	-	-	-
5163109	A	T	MRSN4605_04850	1	oruR	NP_249522.1	transcriptional regulator OruR	snp	missense_variant	MODERATE	p.Val29Glu	1	0	1	-	-	-	-	-	-	-	-	-	-	-	-	-	-	-	-	-	-	-	-	-	-	-	-	-	-	-	-	-	-	-	-	-	-	-
3992875	A	T	MRSN4605_03674	1	parS	NP_250489.1	two-component sensor%2C ParS	snp	missense_variant	MODERATE	p.Thr213Ser	3	0	3	-	-	-	-	-	-	-	-	-	-	-	-	-	-	-	-	-	-	-	-	-	-	-	-	-	-	-	-	-	-	-	-	-	-	-
260357	C	T	MRSN4605_00229	1	pcaT	NP_248920.1	dicarboxylic acid transporter PcaT	snp	missense_variant	MODERATE	p.Ser384Leu	7	7	0	-	-	-	-	-	-	-	-	-	-	-	-	-	-	-	-	-	-	-	-	-	-	-	-	-	-	-	-	-	-	-	-	-	-	-
3682920	ACCACTC	A	MRSN4605_03397	1	pcoA_2	NP_250755.1	copper resistance protein A precursor	del	conservative_inframe_deletion	MODERATE	p.His440_Ser441del	3	3	0	-	-	-	-	-	-	-	-	-	-	-	-	-	-	-	-	-	-	-	-	-	-	-	-	-	-	-	-	-	-	-	-	-	-	-
4209204	T	A	MRSN4605_03949	1	pcrV	NP_250397.1	type III secretion protein PcrV	snp	missense_variant	MODERATE	p.Gln73Leu	2	2	0	-	-	-	-	-	-	-	-	-	-	-	-	-	-	-	-	-	-	-	-	-	-	-	-	-	-	-	-	-	-	-	-	-	-	-
5551895	C	T	MRSN4605_05187	1	pctB	NP_253000.1	chemotactic transducer PctB	snp	stop_gained	HIGH	p.Gln426*	2	0	2	-	-	-	-	-	-	-	-	-	-	-	-	-	-	-	-	-	-	-	-	-	-	-	-	-	-	-	-	-	-	-	-	-	-	-
650261	T	A	MRSN4605_00601	1	pdxA	NP_249284.1	pyridoxal phosphate biosynthetic protein PdxA	Manual	missense_variant	MODERATE	p.Asp235Glu	88	88	0	-	-	-	-	-	-	-	-	-	-	-	+	+	-	-	+	+	+	+	+	+	+	+	+	+	+	+	+	+	+	+	+	-	+	+
4933390	T	A	MRSN4605_04621	1	pdxH	NP_249740.1	pyridoxine 5'-phosphate oxidase	snp	missense_variant	MODERATE	p.Asn93Tyr	1	1	0	-	-	-	-	-	-	-	-	-	-	-	-	-	-	-	-	-	-	+	-	-	-	-	-	-	-	-	-	-	-	-	-	-	-	-
2175371	TTCAACGAACGTAC	T	MRSN4605_02030	1	pelD	NP_251751.1	PelD	del	frameshift_variant	HIGH	p.Phe288fs	14	0	14	-	-	-	-	-	-	-	-	-	-	-	-	-	-	-	-	-	-	-	-	-	-	-	-	-	-	-	-	-	-	-	-	-	-	-
401223	CG	C	MRSN4605_00359	1	pfpI	NP_249046.1	protease PfpI	del	frameshift_variant	HIGH	p.Ala121fs	1	0	1	-	-	-	-	-	-	-	-	-	-	-	-	-	-	-	-	-	-	-	-	-	-	-	-	-	-	-	-	-	-	-	-	-	-	-
1804351	G	A	MRSN4605_01687	1	phnC	NP_252074.1	ATP-binding component of ABC phosphonate transporter	snp	missense_variant	MODERATE	p.Ala54Thr	4	4	0	-	-	-	-	-	-	-	-	-	-	-	-	-	-	-	-	-	-	-	-	-	-	-	-	-	-	-	-	-	-	-	-	-	-	-
4792589	AGCCGAGGACCTTGGCC	A	MRSN4605_04487	1	phoQ	NP_249871.1	two-component sensor PhoQ	del	frameshift_variant	HIGH	p.Glu77fs	2	2	0	-	-	-	-	-	-	-	-	-	-	-	-	-	-	-	-	-	-	-	-	-	-	-	-	-	-	-	-	-	-	-	-	-	-	-
74423	G	A	MRSN4605_00056	1	phzH	NP_248741.1	putative phenazine-modifying enzyme	snp	missense_variant	MODERATE	p.Val53Ile	1	0	1	-	-	-	-	-	-	-	-	-	-	-	-	-	-	-	-	-	-	-	-	-	-	-	-	-	-	-	-	-	-	-	-	-	-	-
5785697	A	G	MRSN4605_05411	1	pilA	NP_253215.1	type 4 fimbrial precursor PilA	snp	missense_variant	MODERATE	p.Ser154Pro	1	1	0	-	-	-	-	-	-	-	-	-	-	-	-	-	-	-	-	-	-	-	-	-	-	-	-	-	-	-	-	-	-	+	-	-	-	-
5786468	G	C	MRSN4605_05412	1	pilB	NP_253216.1	type 4 fimbrial biogenesis protein PilB	snp	missense_variant	MODERATE	p.Ala28Pro	1	0	1	-	-	-	-	-	-	-	-	-	-	-	-	-	-	-	-	-	-	-	-	-	-	-	-	-	-	-	-	-	-	-	-	-	-	-
5790104	GCTATTGCCGGGTGGATT	G	MRSN4605_05414	1	pilD	NP_253218.1	type 4 prepilin peptidase PilD	del	frameshift_variant	HIGH	p.Ala266fs	1	0	1	-	-	-	-	-	-	-	-	-	-	-	-	-	-	-	-	-	-	-	-	-	-	-	-	-	-	-	-	-	-	-	-	-	-	-
454952	C	T	MRSN4605_00418	1	pilJ	NP_249102.1	twitching motility protein PilJ	snp	missense_variant	MODERATE	p.Thr570Ile	1	0	1	-	-	-	-	-	-	-	-	-	-	-	-	-	-	-	-	-	-	-	-	-	-	-	-	-	-	-	-	-	-	-	-	-	-	-
455436	GAACCGCACCGGCGT	G	MRSN4605_00419	1	pilK	NP_249103.1	methyltransferase PilK	del	frameshift_variant	HIGH	p.Asn29fs	1	0	1	-	-	-	-	-	-	-	-	-	-	-	-	-	-	-	-	-	-	-	-	-	-	-	-	-	-	-	-	-	-	-	-	-	-	-
6482938	GT	TA	MRSN4605_06060	1	pilM	NP_253731.1	type 4 fimbrial biogenesis protein PilM	mnp	missense_variant	MODERATE	p.Tyr290Leu	1	1	0	-	-	-	-	-	-	-	-	-	-	-	-	-	-	-	-	-	-	-	-	-	-	-	-	-	-	-	-	-	-	-	-	-	-	-
6482485	TCTTCATCCGCTCGA	T	MRSN4605_06059	1	pilN	NP_253730.1	type 4 fimbrial biogenesis protein PilN	del	frameshift_variant	HIGH	p.Leu82fs	1	0	1	-	-	-	-	-	-	-	-	-	-	-	-	-	-	-	-	-	-	-	-	-	-	-	-	-	-	-	-	-	-	-	-	-	-	-
5897753	G	A	MRSN4605_05538	1	pilR	NP_253237.1	two-component response regulator PilR	snp	missense_variant	MODERATE	p.Gly206Asp	1	0	1	-	-	-	-	-	-	-	-	-	-	-	-	-	-	-	-	-	-	-	-	-	-	-	-	-	-	-	-	-	-	-	-	-	-	-
5897010	A	AT	MRSN4605_05537	1	pilS	NP_253236.1	two-component sensor PilS	ins	frameshift_variant	HIGH	p.Leu495fs	2	0	2	-	-	-	-	-	-	-	-	-	-	-	-	-	-	-	-	-	-	-	-	-	-	-	-	-	-	-	-	-	-	-	-	-	-	-
440266	G	T	MRSN4605_00403	1	pilU_1	NP_249087.1	twitching motility protein PilU	snp	missense_variant	MODERATE	p.Gly124Val	10	0	10	-	-	-	-	-	-	-	-	-	-	-	-	-	-	-	-	-	-	-	-	-	-	-	-	-	-	-	-	-	-	-	-	-	-	-
6169242	A	C	MRSN4605_05783	1	pmrA	NP_253464.1	PmrA: two-component regulator system response regulator PmrA	snp	missense_variant	MODERATE	p.Asp92Ala	1	0	1	-	-	-	-	-	-	-	-	-	-	-	-	-	-	-	-	-	-	-	-	-	-	-	-	-	-	-	-	-	-	-	-	-	-	-
6169817	C	T	MRSN4605_05784	1	pmrB	NP_253465.1	PmrB: two-component regulator system signal sensor kinase PmrB	snp	missense_variant	MODERATE	p.Ala54Val	2	2	0	-	-	-	-	-	-	-	-	-	-	-	-	-	-	-	-	-	-	-	-	-	-	-	-	-	-	-	-	-	-	-	-	-	-	-
6322582	T	TTCGGCA	MRSN4605_05932	1	pncB1	NP_253606.1	nicotinate phosphoribosyltransferase	ins	disruptive_inframe_insertion	MODERATE	p.Ile342_Gly343dup	2	0	2	-	-	-	-	-	-	-	-	-	-	-	-	-	-	-	-	-	-	-	-	-	-	-	-	-	-	-	-	-	-	-	-	-	-	-
3509680	G	C	MRSN4605_03243	1	pqiA_1		Intermembrane transport protein PqiA	snp	missense_variant	MODERATE	p.Ile149Met	9	9	0	-	-	-	-	-	-	-	-	-	-	-	-	-	-	-	-	-	-	-	-	-	-	-	-	-	-	+	-	+	-	-	+	-	-	-
6272795	C	T	MRSN4605_05884	1	prpB_2	NP_249487.1	carboxyphosphonoenolpyruvate phosphonomutase	snp	missense_variant	MODERATE	p.Ala101Thr	1	1	0	-	-	-	-	-	-	-	-	-	-	-	-	-	-	-	-	-	-	-	-	-	-	-	-	-	-	-	-	-	-	-	-	-	-	-
5264663	C	G	MRSN4605_04929	1	prpF		2-methyl-aconitate isomerase	snp	missense_variant	MODERATE	p.Phe178Leu	1	1	0	-	-	-	-	-	-	-	-	-	-	-	-	-	-	-	-	-	-	-	-	-	-	-	-	-	-	-	-	-	-	-	-	-	-	-
4218587	G	A	MRSN4605_03962	1	pscR	NP_250384.1	translocation protein in type III secretion	snp	missense_variant	MODERATE	p.Val36Ile	8	0	8	-	-	-	-	-	-	-	-	-	-	-	-	-	-	-	-	-	-	-	-	-	-	-	-	-	-	-	-	-	-	-	-	-	-	-
3445698	G	A	MRSN4605_03177	1	pslA	NP_250921.1	PslA	snp	missense_variant	MODERATE	p.Thr123Ile	1	1	0	-	-	-	-	-	-	-	-	-	-	-	-	-	-	-	-	-	-	-	-	-	-	-	-	-	-	-	-	-	-	-	-	-	-	-
3439479	C	G	MRSN4605_03173	1	pslE	NP_250925.1	PslE	snp	missense_variant	MODERATE	p.Gln653His	10	0	10	-	-	-	-	-	-	-	-	-	-	-	-	-	-	-	-	-	-	-	-	-	-	-	-	-	-	-	-	-	-	-	-	-	-	-
381372	G	A	MRSN4605_00341	1	ptsP	NP_249028.1	phosphoenolpyruvate-protein phosphotransferase PtsP	snp	missense_variant	MODERATE	p.Glu408Lys	1	0	1	-	-	-	-	-	-	-	-	-	-	-	-	-	-	-	-	-	-	-	-	-	-	-	-	-	-	-	-	-	-	-	-	-	-	-
1389439	G	A	MRSN4605_01319	1	purL	NP_252452.1	phosphoribosylformylglycinamidine synthase	snp	missense_variant	MODERATE	p.Glu20Lys	18	18	0	-	-	-	-	-	-	-	-	-	-	-	+	+	-	-	-	+	+	-	-	-	-	-	-	-	-	-	-	-	-	-	-	-	-	-
6928337	G	A	MRSN4605_06464	1	purU2	NP_254107.1	formyltetrahydrofolate deformylase	snp	missense_variant	MODERATE	p.Ala279Thr	18	18	0	-	-	-	-	-	-	-	-	-	-	-	+	+	-	-	-	+	+	-	-	-	-	-	-	-	-	-	-	-	-	-	-	-	-	-
3495423	G	C	MRSN4605_03230	1	pvdH_2	NP_251103.1	L-2%2C4-diaminobutyrate:2-ketoglutarate 4-aminotransferase%2C PvdH	snp	missense_variant	MODERATE	p.Glu237Gln	1	1	0	-	-	-	-	-	-	-	-	-	-	-	-	-	-	-	-	-	-	-	-	-	-	-	-	-	-	-	-	-	-	-	-	-	-	-
3256229	C	A	MRSN4605_03017	1	pvdT	NP_251080.1	PvdT	snp	stop_gained	HIGH	p.Glu260*	4	4	0	-	-	-	-	-	-	-	-	-	-	-	-	-	-	-	-	-	-	-	-	-	-	-	-	-	-	-	-	-	-	-	-	-	-	-
4826321	G	A	MRSN4605_04516	1	pys1		Pyocin-S1	snp	missense_variant	MODERATE	p.His41Tyr	1	0	1	-	-	-	-	-	-	-	-	-	-	-	-	-	-	-	-	-	-	-	-	-	-	-	-	-	-	-	-	-	-	-	-	-	-	-
5520393	G	C	MRSN4605_05161	1	recC	NP_252975.1	exodeoxyribonuclease V gamma chain	snp	missense_variant	MODERATE	p.Ile519Met	1	1	0	-	-	-	-	-	-	-	-	-	-	-	-	-	-	-	-	-	-	-	-	-	-	-	-	-	-	-	-	-	-	-	-	-	-	-
6155888	G	A	MRSN4605_05770	1	recN	NP_253451.1	DNA repair protein RecN	snp	missense_variant	MODERATE	p.Gly387Ser	1	1	0	-	-	-	-	-	-	-	-	-	-	-	-	-	-	-	-	-	-	-	-	-	-	-	-	-	-	-	-	-	-	-	-	-	-	-
5044919	G	A	MRSN4605_04742	1	relA	NP_249625.1	GTP pyrophosphokinase	snp	missense_variant	MODERATE	p.Ala711Val	7	7	0	-	-	-	-	-	-	-	-	-	-	-	-	-	-	-	-	-	-	-	-	-	-	-	-	-	-	-	-	-	-	-	-	-	-	-
5190321	G	T	MRSN4605_04870	1	rhlE		ATP-dependent RNA helicase RhlE	snp	stop_gained	HIGH	p.Ser707*	4	4	0	-	-	-	-	-	-	-	-	-	-	-	-	-	-	-	-	-	-	-	-	-	-	-	-	-	-	-	-	-	-	-	-	-	-	-
5893382	G	A	MRSN4605_05534	1	rluD	NP_253234.1	pseudouridine synthase	snp	stop_gained	HIGH	p.Gln196*	4	0	4	-	-	-	-	-	-	-	-	-	-	-	-	-	-	-	-	-	-	-	-	-	-	-	-	-	-	-	-	-	-	-	-	-	-	-
6635989	C	T	MRSN4605_06194	1	rmlC	NP_253851.1	dTDP-4-dehydrorhamnose 3%2C5-epimerase	snp	missense_variant	MODERATE	p.Arg74Cys	7	0	7	-	-	-	-	-	-	-	-	-	-	-	-	-	-	-	-	-	-	-	-	-	-	-	-	-	-	-	-	-	-	-	-	-	-	-
1130965	C	T	MRSN4605_01076	1	rodA	NP_252691.1	rod shape-determining protein	snp	missense_variant	MODERATE	p.Pro233Ser	3	0	3	-	-	-	-	-	-	-	-	-	-	-	-	-	-	-	-	-	-	-	-	-	-	-	-	-	-	-	-	-	-	-	-	-	-	-
736865	C	G	MRSN4605_00694	1	rplP	NP_252946.1	50S ribosomal protein L16	snp	missense_variant	MODERATE	p.Ala33Gly	1	0	1	-	-	-	-	-	-	-	-	-	-	-	-	-	-	-	-	-	-	-	-	-	-	-	-	-	-	-	-	-	-	-	-	-	-	-
745795	C	A	MRSN4605_00712	1	rpoA	NP_252928.1	DNA-directed RNA polymerase alpha chain	snp	missense_variant	MODERATE	p.Ala307Asp	11	0	11	-	-	-	-	-	-	-	-	-	-	-	-	-	-	-	-	-	-	-	-	-	-	-	-	-	-	-	-	-	-	-	-	-	-	-
727008	G	C	MRSN4605_00681	1	rpoC	NP_252959.1	DNA-directed RNA polymerase beta* chain	snp	missense_variant	MODERATE	p.Asp1063His	1	1	0	-	-	-	-	-	-	-	-	-	-	-	-	-	-	-	-	-	-	-	-	-	-	-	-	-	-	-	-	-	-	-	-	-	-	-
634198	G	C	MRSN4605_00584	1	rpoD	NP_249267.1	sigma factor RpoD	snp	missense_variant	MODERATE	p.Pro170Ala	12	12	0	-	-	-	-	-	-	-	-	-	-	-	-	-	-	-	-	-	-	-	-	-	-	-	-	-	-	-	-	-	-	-	-	-	-	-
728293	A	G	MRSN4605_00682	1	rpsL	NP_252958.1	30S ribosomal protein S12	snp	missense_variant	MODERATE	p.Thr41Ala	3	0	3	-	-	-	-	-	-	-	-	-	-	-	-	-	-	-	-	-	-	-	-	-	-	-	-	-	-	-	-	-	-	-	-	-	-	-
5079002	C	T	MRSN4605_04775	1	rsmA	NP_249596.1	RsmA	snp	missense_variant	MODERATE	p.Arg31His	8	0	8	-	-	-	-	-	-	-	-	-	-	-	-	-	-	-	-	-	-	-	-	-	-	-	-	-	-	-	-	-	-	-	-	-	-	-
6842602	G	A	MRSN4605_06384	1	sadB	NP_254033.1	SadB	snp	missense_variant	MODERATE	p.Arg257His	2	2	0	-	-	-	-	-	-	-	-	-	-	-	-	-	-	-	-	-	-	-	-	-	-	-	-	-	-	-	-	-	-	-	-	-	-	-
4349556	G	A	MRSN4605_04080	1	sdhC	NP_250272.1	succinate dehydrogenase (C subunit)	snp	missense_variant	MODERATE	p.Pro21Ser	1	1	0	-	-	-	-	-	-	-	-	-	-	-	-	-	-	-	-	-	-	-	-	-	-	-	-	-	-	-	-	-	-	-	-	-	-	-
6166958	T	A	MRSN4605_05780	1	speD2	NP_253461.1	SpeD2	snp	missense_variant	MODERATE	p.Val159Glu	1	0	1	-	-	-	-	-	-	-	-	-	-	-	-	-	-	-	-	-	-	-	-	-	-	-	-	-	-	-	-	-	-	-	-	-	-	-
6833215	A	G	MRSN4605_06376	1	spoT	NP_254025.1	guanosine-3'%2C5'-bis(diphosphate) 3'-pyrophosphohydrolase	snp	missense_variant	MODERATE	p.Asp98Gly	1	0	1	-	-	-	-	-	-	-	-	-	-	-	-	-	-	-	-	-	-	-	-	-	-	-	-	-	-	-	-	-	-	-	-	-	-	-
3687848	A	T	MRSN4605_03401	1	sppD	NP_250751.1	ABC transporter ATP-binding protein%2C SppD	snp	missense_variant	MODERATE	p.Val359Glu	2	2	0	-	-	-	-	-	-	-	-	-	-	-	-	-	-	-	-	-	-	-	-	-	-	-	-	-	-	-	-	-	-	-	-	-	-	-
5539277	C	G	MRSN4605_05179	1	tadA	NP_252992.1	TadA ATPase	snp	missense_variant	MODERATE	p.Val384Leu	4	0	4	-	-	-	-	-	-	-	-	-	-	-	-	-	-	-	-	-	-	-	-	-	-	-	-	-	-	-	-	-	-	-	-	-	-	-
5538456	T	A	MRSN4605_05178	1	tadB	NP_252991.1	TadB	snp	missense_variant	MODERATE	p.Ser237Cys	2	0	2	-	-	-	-	-	-	-	-	-	-	-	-	-	-	-	-	-	-	-	-	-	-	-	-	-	-	-	-	-	-	-	-	-	-	-
5537286	G	A	MRSN4605_05176	1	tadD	NP_252989.1	TadD	snp	missense_variant	MODERATE	p.Pro26Leu	5	0	5	-	-	-	-	-	-	-	-	-	-	-	-	-	-	-	-	-	-	-	-	-	-	-	-	-	-	-	-	-	-	-	-	-	-	-
5540595	G	A	MRSN4605_05180	1	tadZ	NP_252993.1	TadZ	snp	missense_variant	MODERATE	p.Ser338Phe	3	0	3	-	-	-	-	-	-	-	-	-	-	-	-	-	-	-	-	-	-	-	-	-	-	-	-	-	-	-	-	-	-	-	-	-	-	-
90353	C	T	MRSN4605_00074	1	tagQ1	NP_248760.1	TagQ1	snp	missense_variant	MODERATE	p.Gly71Asp	1	1	0	-	-	-	-	-	-	-	-	-	-	-	-	-	-	-	-	-	-	-	-	-	-	-	-	-	-	-	-	-	-	-	-	-	-	-
6513562	A	C	MRSN4605_06087	1	tatC	NP_253757.1	transport protein TatC	snp	missense_variant	MODERATE	p.Thr216Pro	1	1	0	-	-	-	-	-	-	-	-	-	-	-	-	-	-	-	-	-	-	-	-	-	-	-	-	-	-	-	-	-	-	-	-	-	-	-
3350456	C	A	MRSN4605_03097	1	tauD_4	NP_252624.1	taurine dioxygenase	snp	missense_variant	MODERATE	p.Pro14His	6	6	0	-	-	-	-	-	-	-	-	-	-	-	-	-	-	-	-	-	-	-	-	-	-	-	-	-	-	-	-	-	-	-	-	-	-	-
5834913	A	G	MRSN4605_05463	1	tcpE		Toxin coregulated pilus biosynthesis protein E	snp	missense_variant	MODERATE	p.Asn28Ser	54	54	0	+	+	+	+	+	+	+	+	+	+	+	-	-	+	+	-	-	-	-	-	-	-	-	-	-	-	-	-	-	+	+	-	+	+	+
1323906	T	C	MRSN4605_01254	1	tgt	NP_252512.1	queuine tRNA-ribosyltransferase	snp	missense_variant	MODERATE	p.Val136Ala	1	0	1	-	-	-	-	-	-	-	-	-	-	-	-	-	-	-	-	-	-	-	-	-	-	-	-	-	-	-	-	-	-	-	-	-	-	-
2107071	C	A	MRSN4605_01974	1	trpF	NP_251803.1	N-(5'phosphoribosyl)anthranilate (PRA) isomerase	snp	missense_variant	MODERATE	p.Arg208Ser	1	0	1	-	-	-	-	-	-	-	-	-	-	-	-	-	-	-	-	-	-	-	-	-	-	-	-	-	-	-	-	-	-	-	-	-	-	-
2711851	G	A	MRSN4605_02571	1	tse5_2	NP_251374.1	Tse5	snp	missense_variant	MODERATE	p.Ala884Thr	1	0	1	-	-	-	-	-	-	-	-	-	-	-	-	-	-	-	-	-	-	-	-	-	-	-	-	-	-	-	-	-	-	-	-	-	-	-
107827	C	A	MRSN4605_00086	1	tssA1_1	NP_248772.1	TssA1	snp	missense_variant	MODERATE	p.Ala149Glu	1	1	0	-	-	-	-	-	-	-	-	-	-	-	+	-	-	-	-	-	-	-	-	-	-	-	-	-	-	-	-	-	-	-	-	-	-	-
109198	CAGACCAGCCTG	C	MRSN4605_00088	1	tssC1	NP_248774.1	TssC1	del	frameshift_variant	HIGH	p.Gln55fs	3	0	3	-	-	-	-	-	-	-	-	-	-	-	-	-	-	-	-	-	-	-	-	-	-	-	-	-	-	-	-	-	-	-	-	-	-	-
748762	G	A	MRSN4605_00716	1	uvrA	NP_252924.1	excinuclease ABC subunit A	snp	missense_variant	MODERATE	p.Pro928Leu	1	1	0	-	-	-	-	-	-	-	-	-	-	-	-	-	-	-	-	-	-	+	-	-	-	-	-	-	-	-	-	-	-	-	-	-	-	-
2489718	T	G	MRSN4605_02349	1	vacJ	NP_251490.1	VacJ	snp	missense_variant	MODERATE	p.Leu127Arg	2	2	0	-	-	-	-	-	-	-	-	-	-	-	-	-	-	-	-	-	-	-	-	-	-	-	-	-	-	-	-	-	-	-	-	-	-	-
1309216	C	T	MRSN4605_01242	1	valS	NP_252523.1	valyl-tRNA synthetase	snp	missense_variant	MODERATE	p.Gly913Asp	14	14	0	-	-	-	-	-	-	-	-	-	-	-	-	-	-	-	-	-	-	-	-	-	-	-	-	-	-	-	-	-	-	-	-	-	-	-
5494738	C	T	MRSN4605_05146	1	vreA	NP_249365.1	VreA	snp	missense_variant	MODERATE	p.Ser58Asn	2	2	0	-	-	-	-	-	-	-	-	-	-	-	-	-	-	-	-	-	-	-	-	-	-	-	-	-	-	-	-	-	-	-	-	-	-	-
6420480	G	C	MRSN4605_06015	1	waaL	NP_253686.1	O-antigen ligase%2C WaaL	snp	missense_variant	MODERATE	p.Ala361Pro	1	0	1	-	-	-	-	-	-	-	-	-	-	-	-	-	-	-	-	-	-	-	-	-	-	-	-	-	-	-	-	-	-	-	-	-	-	-
2072175	G	GCAAGC	MRSN4605_01938	1	wbpJ	NP_251837.1	putative glycosyl transferase WbpJ	ins	frameshift_variant	HIGH	p.Leu326fs	3	0	3	-	-	-	-	-	-	-	-	-	-	-	-	-	-	-	-	-	-	-	-	-	-	-	-	-	-	-	-	-	-	-	-	-	-	-
2072449	CTGCTCGTGTTCATGTGATG	C	MRSN4605_01939	1	wbpK	NP_251836.1	putative NAD-dependent epimerase/dehydratase WbpK	del	frameshift_variant	HIGH	p.Ala72fs	5	5	0	-	-	-	-	-	-	-	-	-	-	-	-	-	-	-	-	-	-	-	-	-	-	-	-	-	-	-	-	-	-	-	-	-	-	-
2076187	CTAT	C	MRSN4605_01941	1	wbpM	NP_251831.1	nucleotide sugar epimerase/dehydratase WbpM	del	conservative_inframe_deletion	MODERATE	p.Tyr647del	4	0	4	-	-	-	-	-	-	-	-	-	-	-	-	-	-	-	-	-	-	-	-	-	-	-	-	-	-	-	-	-	-	-	-	-	-	-
6966232	GA	G	MRSN4605_06495	1	wbpX	NP_254136.1	glycosyltransferase WbpX	del	frameshift_variant	HIGH	p.Ser19fs	127	0	127	-	-	-	-	-	-	-	-	-	-	-	-	-	-	-	-	-	-	-	-	-	-	-	-	-	-	-	-	-	-	-	-	-	-	-
6964630	G	A	MRSN4605_06494	1	wbpY	NP_254135.1	glycosyltransferase WbpY	snp	missense_variant	MODERATE	p.Pro98Ser	5	5	0	-	-	-	-	-	-	-	-	-	-	-	-	-	-	-	-	-	-	-	-	-	-	-	-	-	-	-	-	-	-	-	-	-	-	-
1464568	G	A	MRSN4605_01381	1	wspR	NP_252391.1	WspR	snp	stop_gained	HIGH	p.Trp193*	2	2	0	-	-	-	-	-	-	-	-	-	-	-	-	-	-	-	-	-	-	+	-	-	-	-	-	-	-	-	-	-	-	-	-	-	-	-
2062340	C	T	MRSN4605_01929	1	wzz	NP_251850.1	O-antigen chain length regulator	snp	missense_variant	MODERATE	p.Ser172Phe	1	0	1	-	-	-	-	-	-	-	-	-	-	-	-	-	-	-	-	-	-	-	-	-	-	-	-	-	-	-	-	-	-	-	-	-	-	-
6603538	C	T	MRSN4605_06169	1	xerC_9		Tyrosine recombinase XerC	snp	missense_variant	MODERATE	p.Ser54Phe	2	2	0	-	-	-	-	-	-	-	-	-	-	-	-	-	-	-	-	-	-	-	-	-	-	-	-	-	-	-	-	-	-	-	-	-	-	-
3913387	C	T	MRSN4605_03599	1	xqhA	NP_250559.1	secretion protein XqhA	snp	missense_variant	MODERATE	p.Gly542Asp	1	1	0	-	-	-	-	-	-	-	-	-	-	-	-	-	-	-	-	-	-	-	-	-	-	-	-	-	-	-	-	-	-	+	-	-	-	-
2262095	C	T	MRSN4605_02119	1	ycbX		putative protein YcbX	snp	missense_variant	MODERATE	p.Pro119Ser	9	9	0	-	-	-	-	-	-	-	-	-	-	-	-	-	-	-	-	-	-	-	-	-	-	-	-	-	-	+	-	+	-	-	+	-	-	-
5712226	C	T	MRSN4605_05350	1	zupT		Zinc transporter ZupT	snp	missense_variant	MODERATE	p.Gly27Asp	1	0	1	-	-	-	-	-	-	-	-	-	-	-	-	-	-	-	-	-	-	-	-	-	-	-	-	-	-	-	-	-	-	-	-	-	-	-
5348106	A	G	MRSN4605_05010	N/A	.		hypothetical protein	snp	synonymous_variant	LOW	p.Gly350Gly	129	0	129	-	-	-	-	-	-	-	-	-	-	-	-	-	-	-	-	-	-	-	-	-	-	-	-	-	-	-	-	-	-	-	-	-	-	-
1949285	C	T	MRSN4605_01815	N/A	.	NP_251953.1	hypothetical protein	snp	synonymous_variant	LOW	p.Gln262Gln	51	0	51	-	-	-	-	-	-	-	-	-	-	-	-	-	-	-	-	-	-	-	-	-	-	-	-	-	-	-	-	-	-	-	-	-	-	-
5332470	G	A	MRSN4605_04994	N/A	.	NP_249424.1	putative pseudouridylate synthase	snp	synonymous_variant	LOW	p.Lys58Lys	51	0	51	-	-	-	-	-	-	-	-	-	-	-	-	-	-	-	-	-	-	-	-	-	-	-	-	-	-	-	-	-	-	-	-	-	-	-
4335419	C	T	MRSN4605_04069	N/A	.		hypothetical protein	snp	synonymous_variant	LOW	p.Ser41Ser	37	0	37	-	-	-	-	-	-	-	-	-	-	-	-	-	-	-	-	-	-	-	-	-	-	-	-	-	-	-	-	-	-	-	-	-	-	-
4354000	C	T	MRSN4605_04086	N/A	.	NP_250267.1	putative 3-hydroxyisobutyrate dehydrogenase	snp	synonymous_variant	LOW	p.Gln184Gln	31	0	31	-	-	-	-	-	-	-	-	-	-	-	-	-	-	-	-	-	-	-	-	-	-	-	-	-	-	-	-	-	-	-	-	-	-	-
2131648	A	T	MRSN4605_01999	N/A	.		hypothetical protein	snp	synonymous_variant	LOW	p.Val371Val	29	29	0	-	-	-	-	-	-	-	-	-	-	-	+	+	-	-	-	+	+	-	-	-	-	-	-	-	-	+	-	+	-	-	+	-	-	-
537543	C	T	MRSN4605_00483	N/A	.	NP_249167.1	putative permease	snp	synonymous_variant	LOW	p.Gly351Gly	24	0	24	-	-	-	-	-	-	-	-	-	-	-	-	-	-	-	-	-	-	-	-	-	-	-	-	-	-	-	-	-	-	-	-	-	-	-
5511070	G	A	MRSN4605_05158	N/A	.	NP_252972.1	putative exonuclease	snp	synonymous_variant	LOW	p.Gln730Gln	24	0	24	-	-	-	-	-	-	-	-	-	-	-	-	-	-	-	-	-	-	-	-	-	-	-	-	-	-	-	-	-	-	-	-	-	-	-
902148	G	A	MRSN4605_00862	N/A	.		hypothetical protein	snp	synonymous_variant	LOW	p.Gly44Gly	21	0	21	-	-	-	-	-	-	-	-	-	-	-	-	-	-	-	-	-	-	-	-	-	-	-	-	-	-	-	-	-	-	-	-	-	-	-
1726634	G	A	MRSN4605_01608	N/A	.	NP_252151.1	hypothetical protein	snp	synonymous_variant	LOW	p.Gly182Gly	18	0	18	-	-	-	-	-	-	-	-	-	-	-	-	-	-	-	-	-	-	-	-	-	-	-	-	-	-	-	-	-	-	-	-	-	-	-
6664491	G	A	MRSN4605_06219	N/A	.	NP_253874.1	putative acyl-CoA dehydrogenase	snp	synonymous_variant	LOW	p.Leu151Leu	18	0	18	-	-	-	-	-	-	-	-	-	-	-	-	-	-	-	-	-	-	-	-	-	-	-	-	-	-	-	-	-	-	-	-	-	-	-
5949895	G	A	MRSN4605_05587	N/A	.	NP_253285.1	putative ATP-binding component of ABC transporter	snp	synonymous_variant	LOW	p.Arg277Arg	14	14	0	-	-	-	-	-	-	-	-	-	-	-	-	-	-	-	-	-	-	-	-	-	-	-	-	-	-	-	-	-	-	-	-	-	-	-
1818282	C	T	MRSN4605_01705	N/A	.		hypothetical protein	snp	synonymous_variant	LOW	p.Leu56Leu	13	0	13	-	-	-	-	-	-	-	-	-	-	-	-	-	-	-	-	-	-	-	-	-	-	-	-	-	-	-	-	-	-	-	-	-	-	-
2598834	T	G	MRSN4605_02471	N/A	.		hypothetical protein	snp	synonymous_variant	LOW	p.Arg197Arg	11	0	11	-	-	-	-	-	-	-	-	-	-	-	-	-	-	-	-	-	-	-	-	-	-	-	-	-	-	-	-	-	-	-	-	-	-	-
202059	T	A	MRSN4605_00175	N/A	.		hypothetical protein	snp	synonymous_variant	LOW	p.Leu4Leu	9	9	0	-	-	-	-	-	-	-	-	-	-	-	-	-	-	-	-	-	-	-	-	-	-	-	-	-	-	+	-	+	-	-	+	-	-	-
2674662	C	T	MRSN4605_02540	N/A	.	NP_251406.1	putative FMN oxidoreductase	snp	synonymous_variant	LOW	p.Phe133Phe	9	9	0	-	-	-	-	-	-	-	-	-	-	-	-	-	-	-	-	-	-	-	-	-	-	-	-	-	-	+	-	+	-	-	+	-	-	-
694655	C	A	MRSN4605_00649	N/A	.	NP_249348.1	putative ATPase	snp	synonymous_variant	LOW	p.Arg164Arg	8	0	8	-	-	-	-	-	-	-	-	-	-	-	-	-	-	-	-	-	-	-	-	-	-	-	-	-	-	-	-	-	-	-	-	-	-	-
1961015	G	A	MRSN4605_01829	N/A	.		hypothetical protein	snp	synonymous_variant	LOW	p.Asp361Asp	8	8	0	-	-	-	-	-	-	-	-	-	-	-	-	-	-	-	-	-	-	-	-	-	-	-	-	-	-	-	-	-	+	+	-	-	+	+
3421336	C	A	MRSN4605_03156	N/A	.		hypothetical protein	snp	synonymous_variant	LOW	p.Arg245Arg	8	8	0	-	-	-	-	-	-	-	-	-	-	-	-	-	-	-	-	-	-	-	-	-	-	-	-	-	-	-	-	-	+	+	-	-	+	+
3832021	G	A	MRSN4605_03531	N/A	.	NP_250623.1	putative hydroxylase large subunit	snp	synonymous_variant	LOW	p.Gly434Gly	8	8	0	-	-	-	-	-	-	-	-	-	-	-	-	-	-	-	-	-	-	+	-	+	+	+	+	+	-	-	+	-	-	-	-	-	-	-
7046903	G	A	MRSN4605_06572	N/A	.		hypothetical protein	snp	synonymous_variant	LOW	p.Leu58Leu	8	8	0	-	-	-	-	-	-	-	-	-	-	-	-	-	-	-	-	-	-	+	-	+	+	+	+	+	-	-	+	-	-	-	-	-	-	-
878885	T	C	MRSN4605_00822	N/A	.		hypothetical protein	snp	synonymous_variant	LOW	p.Pro8Pro	7	0	7	-	-	-	-	-	-	-	-	-	-	-	-	-	-	-	-	-	-	-	-	-	-	-	-	-	-	-	-	-	-	-	-	-	-	-
2625320	C	T	MRSN4605_02502	N/A	.		hypothetical protein	snp	synonymous_variant	LOW	p.Leu16Leu	6	0	6	-	-	-	-	-	-	-	-	-	-	-	-	-	-	-	-	-	-	-	-	-	-	-	-	-	-	-	-	-	-	-	-	-	-	-
353376	C	A	MRSN4605_00314	N/A	.	NP_249003.1	hypothetical protein	snp	synonymous_variant	LOW	p.Pro58Pro	5	5	0	-	-	-	-	-	-	-	-	-	-	-	-	-	-	-	-	-	-	-	-	-	-	-	-	-	-	-	-	-	-	-	-	-	-	-
395639	G	T	MRSN4605_00355	N/A	.	NP_249042.1	hypothetical protein	snp	synonymous_variant	LOW	p.Pro72Pro	5	5	0	-	-	-	-	-	-	-	-	-	-	-	-	-	-	-	-	-	-	-	-	-	-	-	-	-	-	-	-	-	-	-	-	-	-	-
1926357	C	T	MRSN4605_01797	N/A	.		hypothetical protein	snp	synonymous_variant	LOW	p.Gly131Gly	5	5	0	-	-	-	-	-	-	-	-	-	-	-	-	-	-	-	-	-	-	-	-	-	-	-	-	-	-	-	-	-	-	-	-	-	-	-
2415339	G	A	MRSN4605_02267	N/A	.		hypothetical protein	snp	synonymous_variant	LOW	p.Ser115Ser	5	5	0	-	-	-	-	-	-	-	-	-	-	-	-	-	-	-	-	-	-	-	-	-	-	-	-	-	-	-	-	-	-	-	-	-	-	-
5792060	C	T	MRSN4605_05419	N/A	.		hypothetical protein	snp	synonymous_variant	LOW	p.Val145Val	5	0	5	-	-	-	-	-	-	-	-	-	-	-	-	-	-	-	-	-	-	-	-	-	-	-	-	-	-	-	-	-	-	-	-	-	-	-
6734110	G	C	MRSN4605_06281	N/A	.		hypothetical protein	snp	synonymous_variant	LOW	p.Arg97Arg	5	5	0	-	-	-	-	-	-	-	-	-	-	-	-	-	-	-	-	-	-	-	-	-	-	-	-	-	-	-	-	-	-	-	-	-	-	-
6750717	G	C	MRSN4605_06298	N/A	.		hypothetical protein	snp	synonymous_variant	LOW	p.Gly29Gly	5	0	5	-	-	-	-	-	-	-	-	-	-	-	-	-	-	-	-	-	-	-	-	-	-	-	-	-	-	-	-	-	-	-	-	-	-	-
6750780	G	T	MRSN4605_06298	N/A	.		hypothetical protein	snp	synonymous_variant	LOW	p.Ala8Ala	5	0	5	-	-	-	-	-	-	-	-	-	-	-	-	-	-	-	-	-	-	-	-	-	-	-	-	-	-	-	-	-	-	-	-	-	-	-
955261	G	A	MRSN4605_00915	N/A	.		hypothetical protein	snp	synonymous_variant	LOW	p.Leu139Leu	4	4	0	-	-	-	-	-	-	-	-	-	-	-	-	-	-	-	-	-	-	-	-	-	-	-	-	-	-	-	-	-	-	-	-	-	-	-
4653694	A	G	MRSN4605_04365	N/A	.		hypothetical protein	snp	synonymous_variant	LOW	p.Arg13Arg	4	4	0	-	-	-	-	-	-	-	-	-	-	-	-	-	-	-	-	-	-	-	-	-	-	-	-	-	-	-	-	-	-	-	-	-	-	-
5142991	A	G	MRSN4605_04834	N/A	.	NP_249538.1	diguanylate cyclase	snp	synonymous_variant	LOW	p.Gly354Gly	4	0	4	-	-	-	-	-	-	-	-	-	-	-	-	-	-	-	-	-	-	-	-	-	-	-	-	-	-	-	-	-	-	-	-	-	-	-
6622704	A	G	MRSN4605_06180	N/A	.		hypothetical protein	snp	synonymous_variant	LOW	p.Glu156Glu	4	0	4	-	-	-	-	-	-	-	-	-	-	-	-	-	-	-	-	-	-	-	-	-	-	-	-	-	-	-	-	-	-	-	-	-	-	-
249312	G	A	MRSN4605_00219	N/A	.	NP_248910.1	putative aldehyde dehydrogenase	snp	synonymous_variant	LOW	p.Thr450Thr	3	0	3	-	-	-	-	-	-	-	-	-	-	-	-	-	-	-	-	-	-	-	-	-	-	-	-	-	-	-	-	-	-	-	-	-	-	-
1060278	C	T	MRSN4605_01007	N/A	.		hypothetical protein	snp	synonymous_variant	LOW	p.Arg422Arg	3	3	0	-	-	-	-	-	-	-	-	-	-	-	-	-	-	-	-	-	-	-	-	-	-	-	-	-	-	-	-	-	-	-	-	-	-	-
2150496	C	T	MRSN4605_02014	N/A	.		hypothetical protein	snp	synonymous_variant	LOW	p.Leu245Leu	3	0	3	-	-	-	-	-	-	-	-	-	-	-	-	-	-	-	-	-	-	-	-	-	-	-	-	-	-	-	-	-	-	-	-	-	-	-
4466717	T	G	MRSN4605_04190	N/A	.	NP_250019.1	putative transcriptional regulator	snp	synonymous_variant	LOW	p.Ala256Ala	3	0	3	-	-	-	-	-	-	-	-	-	-	-	-	-	-	-	-	-	-	-	-	-	-	-	-	-	-	-	-	-	-	-	-	-	-	-
5274735	G	A	MRSN4605_04937	N/A	.		hypothetical protein	snp	synonymous_variant	LOW	p.Leu174Leu	3	3	0	-	-	-	-	-	-	-	-	-	-	-	-	-	-	-	-	-	-	-	-	-	-	-	-	-	-	-	-	-	-	-	-	-	-	-
5947050	C	T	MRSN4605_05585	N/A	.	NP_253283.1	putative permease of ABC transporter	snp	synonymous_variant	LOW	p.Leu274Leu	3	3	0	-	-	-	-	-	-	-	-	-	-	-	-	-	-	-	-	-	-	-	-	-	-	-	-	-	-	-	-	-	-	-	-	-	-	-
1405826	A	G	MRSN4605_01333	N/A	.		hypothetical protein	snp	synonymous_variant	LOW	p.Glu109Glu	2	2	0	-	-	-	-	-	-	-	-	-	-	-	-	-	-	-	-	-	-	-	-	-	-	-	-	-	-	-	-	-	-	-	-	-	-	-
1697417	G	A	MRSN4605_01585	N/A	.		hypothetical protein	snp	synonymous_variant	LOW	p.Leu194Leu	2	2	0	-	-	-	-	-	-	-	-	-	-	-	-	-	-	-	-	-	-	-	+	-	-	-	-	-	+	-	-	-	-	-	-	-	-	-
1743550	G	A	MRSN4605_01622	N/A	.	NP_252137.1	putative ATP-binding component of ABC transporter	snp	synonymous_variant	LOW	p.Glu108Glu	2	0	2	-	-	-	-	-	-	-	-	-	-	-	-	-	-	-	-	-	-	-	-	-	-	-	-	-	-	-	-	-	-	-	-	-	-	-
2299476	C	T	MRSN4605_02153	N/A	.		hypothetical protein	snp	synonymous_variant	LOW	p.Pro98Pro	2	2	0	-	-	-	-	-	-	-	-	-	-	-	-	-	-	-	-	-	-	-	-	-	-	-	-	-	-	-	-	-	-	-	-	-	-	-
2642401	A	G	MRSN4605_02510	N/A	.		hypothetical protein	snp	synonymous_variant	LOW	p.Leu212Leu	2	2	0	-	-	-	-	-	-	-	-	-	-	-	-	-	-	-	-	-	-	-	-	-	-	-	-	-	-	-	-	-	-	-	-	-	-	-
3301878	G	A	MRSN4605_03055	N/A	.	NP_251041.1	putative permease of ABC transporter	snp	synonymous_variant	LOW	p.Leu189Leu	2	2	0	-	-	-	-	-	-	-	-	-	-	-	-	-	-	-	-	-	-	+	-	-	-	-	-	-	-	-	-	-	-	-	-	-	-	-
3373026	G	A	MRSN4605_03111	N/A	.		hypothetical protein	snp	synonymous_variant	LOW	p.Leu142Leu	2	2	0	-	-	-	-	-	-	-	-	-	-	-	-	-	-	-	-	-	-	-	-	-	-	-	-	-	-	-	-	-	-	-	-	-	-	-
3398427	G	A	MRSN4605_03136	N/A	.	NP_250961.1	putative acetyltransferase	snp	synonymous_variant	LOW	p.Thr119Thr	2	2	0	-	-	-	-	-	-	-	-	-	-	-	-	-	-	-	-	-	-	-	-	-	-	-	-	-	-	-	-	-	-	-	-	-	-	-
3847047	G	A	MRSN4605_03542	N/A	.	NP_250612.1	putative TonB-dependent receptor	snp	synonymous_variant	LOW	p.Phe636Phe	2	2	0	-	-	-	-	-	-	-	-	-	-	-	-	-	-	-	-	-	-	-	-	-	-	-	-	-	-	-	-	-	-	-	-	-	-	-
3847554	G	A	MRSN4605_03542	N/A	.	NP_250612.1	putative TonB-dependent receptor	snp	synonymous_variant	LOW	p.Tyr467Tyr	2	2	0	-	-	-	-	-	-	-	-	-	-	-	-	-	-	-	-	-	-	-	-	-	-	-	-	-	-	-	-	-	-	-	-	-	-	-
4844962	G	A	MRSN4605_04534	N/A	.		hypothetical protein	snp	synonymous_variant	LOW	p.Ala182Ala	2	0	2	-	-	-	-	-	-	-	-	-	-	-	-	-	-	-	-	-	-	-	-	-	-	-	-	-	-	-	-	-	-	-	-	-	-	-
5592980	G	A	MRSN4605_05229	N/A	.		hypothetical protein	snp	synonymous_variant	LOW	p.Asp175Asp	2	2	0	-	-	-	-	-	-	-	-	-	-	-	-	-	-	-	-	-	-	-	-	-	-	-	-	-	-	-	-	-	-	-	-	-	-	-
6270534	C	T	MRSN4605_05881	N/A	.		hypothetical protein	snp	synonymous_variant	LOW	p.Leu249Leu	2	2	0	-	-	-	-	-	-	-	-	-	-	-	-	-	-	-	-	-	-	-	+	-	-	-	-	-	+	-	-	-	-	-	-	-	-	-
6575928	G	A	MRSN4605_06138	N/A	.		hypothetical protein	snp	synonymous_variant	LOW	p.Pro67Pro	2	0	2	-	-	-	-	-	-	-	-	-	-	-	-	-	-	-	-	-	-	-	-	-	-	-	-	-	-	-	-	-	-	-	-	-	-	-
6632251	C	T	MRSN4605_06189	N/A	.	NP_253847.1	drug efflux transporter	snp	synonymous_variant	LOW	p.Ala412Ala	2	0	2	-	-	-	-	-	-	-	-	-	-	-	-	-	-	-	-	-	-	-	-	-	-	-	-	-	-	-	-	-	-	-	-	-	-	-
171958	G	T	MRSN4605_00149	N/A	.		hypothetical protein	snp	synonymous_variant	LOW	p.Ile160Ile	1	1	0	-	-	-	-	-	-	-	-	-	-	-	-	-	-	-	-	-	-	-	-	-	-	-	-	-	-	-	-	-	-	-	-	-	-	-
175751	C	T	MRSN4605_00153	N/A	.	NP_248838.1	adenine deaminase	snp	synonymous_variant	LOW	p.Leu68Leu	1	0	1	-	-	-	-	-	-	-	-	-	-	-	-	-	-	-	-	-	-	-	-	-	-	-	-	-	-	-	-	-	-	-	-	-	-	-
276123	G	A	MRSN4605_00242	N/A	.		hypothetical protein	snp	synonymous_variant	LOW	p.Gln535Gln	1	0	1	-	-	-	-	-	-	-	-	-	-	-	-	-	-	-	-	-	-	-	-	-	-	-	-	-	-	-	-	-	-	-	-	-	-	-
400635	G	A	MRSN4605_00358	N/A	.	NP_249045.1	hypothetical protein	snp	synonymous_variant	LOW	p.Leu113Leu	1	0	1	-	-	-	-	-	-	-	-	-	-	-	-	-	-	-	-	-	-	-	-	-	-	-	-	-	-	-	-	-	-	-	-	-	-	-
502212	G	A	MRSN4605_00451	N/A	.	NP_249137.1	hypothetical protein	snp	synonymous_variant	LOW	p.Gly343Gly	1	1	0	-	-	-	-	-	-	-	-	-	-	-	-	-	-	-	-	-	-	-	-	-	-	-	-	-	-	-	-	-	-	-	-	-	-	-
527726	C	T	MRSN4605_00472	N/A	.		hypothetical protein	snp	synonymous_variant	LOW	p.Leu44Leu	1	0	1	-	-	-	-	-	-	-	-	-	-	-	-	-	-	-	-	-	-	-	-	-	-	-	-	-	-	-	-	-	-	-	-	-	-	-
599746	G	A	MRSN4605_00550	N/A	.	NP_249233.1	hypothetical protein	snp	synonymous_variant	LOW	p.Ala22Ala	1	0	1	-	-	-	-	-	-	-	-	-	-	-	-	-	-	-	-	-	-	-	-	-	-	-	-	-	-	-	-	-	-	-	-	-	-	-
645230	C	T	MRSN4605_00596	N/A	.	NP_249279.1	hypothetical protein	snp	synonymous_variant	LOW	p.Arg635Arg	1	0	1	-	-	-	-	-	-	-	-	-	-	-	-	-	-	-	-	-	-	-	-	-	-	-	-	-	-	-	-	-	-	-	-	-	-	-
815614	G	A	MRSN4605_00763	N/A	.	NP_252876.1	putative major facilitator superfamily (MFS) transporter	snp	synonymous_variant	LOW	p.Arg315Arg	1	0	1	-	-	-	-	-	-	-	-	-	-	-	-	-	-	-	-	-	-	-	-	-	-	-	-	-	-	-	-	-	-	-	-	-	-	-
995752	C	T	MRSN4605_00951	N/A	.	NP_252759.1	putative transcriptional regulator	snp	synonymous_variant	LOW	p.Asp268Asp	1	1	0	-	-	-	-	-	-	-	-	-	-	-	-	-	-	-	-	-	-	-	-	-	-	-	-	-	-	-	-	-	-	-	-	-	-	-
1038766	C	T	MRSN4605_00994	N/A	.		hypothetical protein	snp	synonymous_variant	LOW	p.Arg364Arg	1	0	1	-	-	-	-	-	-	-	-	-	-	-	-	-	-	-	-	-	-	-	-	-	-	-	-	-	-	-	-	-	-	-	-	-	-	-
1068313	G	A	MRSN4605_01016	N/A	.		hypothetical protein	snp	synonymous_variant	LOW	p.Tyr95Tyr	1	1	0	-	-	-	-	-	-	-	-	-	-	-	-	-	-	-	-	-	-	-	-	-	-	-	-	-	-	-	-	-	-	-	-	-	-	-
1120317	C	T	MRSN4605_01065	N/A	.	NP_252702.1	hypothetical protein	snp	synonymous_variant	LOW	p.Leu190Leu	1	1	0	-	-	-	-	-	-	-	-	-	-	-	-	-	-	-	-	-	-	-	-	-	-	-	-	-	-	-	-	-	-	-	-	-	-	-
1163649	A	T	MRSN4605_01107	N/A	.		hypothetical protein	snp	synonymous_variant	LOW	p.Ala29Ala	1	0	1	-	-	-	-	-	-	-	-	-	-	-	-	-	-	-	-	-	-	-	-	-	-	-	-	-	-	-	-	-	-	-	-	-	-	-
1170260	C	T	MRSN4605_01116	N/A	.	NP_252650.1	putative ATP-dependent helicase	snp	synonymous_variant	LOW	p.Ser89Ser	1	0	1	-	-	-	-	-	-	-	-	-	-	-	-	-	-	-	-	-	-	-	-	-	-	-	-	-	-	-	-	-	-	-	-	-	-	-
1209231	C	T	MRSN4605_01150	N/A	.	NP_252616.1	putative transcriptional regulator	snp	synonymous_variant	LOW	p.Pro145Pro	1	1	0	-	-	-	-	-	-	-	-	-	-	-	-	-	-	-	-	-	-	-	-	-	-	-	-	-	-	-	-	-	-	-	-	-	-	-
1575539	G	A	MRSN4605_01486	N/A	.	NP_252287.1	putative amino acid permease	snp	synonymous_variant	LOW	p.Thr132Thr	1	0	1	-	-	-	-	-	-	-	-	-	-	-	-	-	-	-	-	-	-	-	-	-	-	-	-	-	-	-	-	-	-	-	-	-	-	-
1760568	C	T	MRSN4605_01645	N/A	.	NP_250258.1	hypothetical protein	snp	synonymous_variant	LOW	p.Glu276Glu	1	0	1	-	-	-	-	-	-	-	-	-	-	-	-	-	-	-	-	-	-	-	-	-	-	-	-	-	-	-	-	-	-	-	-	-	-	-
1766651	G	A	MRSN4605_01649	N/A	.	NP_252110.1	putative transcriptional regulator	snp	synonymous_variant	LOW	p.Leu268Leu	1	1	0	-	-	-	-	-	-	-	-	-	-	-	-	-	-	-	-	-	-	-	-	-	-	-	-	-	-	-	-	-	-	-	-	-	-	-
1909470	G	T	MRSN4605_01780	N/A	.	NP_251987.1	putative ATP-dependent helicase	snp	synonymous_variant	LOW	p.Pro1116Pro	1	1	0	-	-	-	-	-	-	-	-	-	-	-	-	-	-	-	-	-	-	-	-	-	-	-	-	-	-	-	-	-	-	-	-	-	-	-
2438354	C	T	MRSN4605_02291	N/A	.		hypothetical protein	snp	synonymous_variant	LOW	p.Phe23Phe	1	0	1	-	-	-	-	-	-	-	-	-	-	-	-	-	-	-	-	-	-	-	-	-	-	-	-	-	-	-	-	-	-	-	-	-	-	-
3057160	C	T	MRSN4605_02898	N/A	.		hypothetical protein	snp	synonymous_variant	LOW	p.Pro234Pro	1	0	1	-	-	-	-	-	-	-	-	-	-	-	-	-	-	-	-	-	-	-	-	-	-	-	-	-	-	-	-	-	-	-	-	-	-	-
3108515	C	T	MRSN4605_02939	N/A	.		hypothetical protein	snp	synonymous_variant	LOW	p.Gly3007Gly	1	0	1	-	-	-	-	-	-	-	-	-	-	-	-	-	-	-	-	-	-	-	-	-	-	-	-	-	-	-	-	-	-	-	-	-	-	-
3347583	C	T	MRSN4605_03093	N/A	.	NP_251004.1	putative major facilitator superfamily (MFS) transporter	snp	synonymous_variant	LOW	p.Gly128Gly	1	1	0	-	-	-	-	-	-	-	-	-	-	-	-	-	-	-	-	-	-	-	-	-	-	-	-	-	-	-	-	-	-	-	-	-	-	-
3644782	C	T	MRSN4605_03369	N/A	.	NP_249977.1	putative major facilitator superfamily (MFS) transporter	snp	synonymous_variant	LOW	p.Ala15Ala	1	0	1	-	-	-	-	-	-	-	-	-	-	-	-	-	-	-	-	-	-	-	-	-	-	-	-	-	-	-	-	-	-	-	-	-	-	-
3717901	C	T	MRSN4605_03425	N/A	.	NP_250725.1	putative decarboxylase	snp	synonymous_variant	LOW	p.Arg48Arg	1	0	1	-	-	-	-	-	-	-	-	-	-	-	-	-	-	-	-	-	-	-	-	-	-	-	-	-	-	-	-	-	-	-	-	-	-	-
3857792	G	A	MRSN4605_03550	N/A	.		hypothetical protein	snp	synonymous_variant	LOW	p.Ala499Ala	1	0	1	-	-	-	-	-	-	-	-	-	-	-	-	-	-	-	-	-	-	-	-	-	-	-	-	-	-	-	-	-	-	-	-	-	-	-
3866270	C	G	MRSN4605_03559	N/A	.	NP_250598.1	putative major facilitator superfamily (MFS) transporter	snp	synonymous_variant	LOW	p.Ala100Ala	1	1	0	-	-	-	-	-	-	-	-	-	-	-	-	-	-	-	-	-	-	-	-	-	-	-	-	-	-	-	-	-	-	-	-	-	-	-
4429367	G	A	MRSN4605_04152	N/A	.	NP_250056.1	putative siderophore receptor	snp	synonymous_variant	LOW	p.Thr127Thr	1	1	0	-	-	-	-	-	-	-	-	-	-	-	-	-	-	-	-	-	-	-	-	-	-	-	-	-	-	-	-	-	-	-	-	-	-	-
4491975	C	A	MRSN4605_04214	N/A	.	NP_249995.1	putative oligopeptidase	snp	synonymous_variant	LOW	p.Val431Val	1	1	0	-	-	-	-	-	-	-	-	-	-	-	-	-	-	-	-	-	-	-	-	-	-	-	-	-	-	-	-	-	-	-	-	-	-	-
4578851	G	T	MRSN4605_04297	N/A	.	NP_250141.1	hypothetical protein	snp	synonymous_variant	LOW	p.Arg119Arg	1	1	0	-	-	-	-	-	-	-	-	-	-	-	-	-	-	-	-	-	-	-	-	-	-	-	-	-	-	-	-	-	-	-	-	-	-	-
4585801	G	A	MRSN4605_04306	N/A	.	NP_250132.1	putative flagellar hook-length control protein FliK	snp	synonymous_variant	LOW	p.Thr151Thr	1	1	0	-	-	-	-	-	-	-	-	-	-	-	-	-	-	-	-	-	-	-	-	-	-	-	-	-	-	-	-	-	-	-	-	-	-	-
4586537	C	T	MRSN4605_04307	N/A	.		hypothetical protein	snp	synonymous_variant	LOW	p.Leu33Leu	1	0	1	-	-	-	-	-	-	-	-	-	-	-	-	-	-	-	-	-	-	-	-	-	-	-	-	-	-	-	-	-	-	-	-	-	-	-
4629270	C	A	MRSN4605_04344	N/A	.	NP_250104.1	putative transcriptional regulator	snp	synonymous_variant	LOW	p.Pro256Pro	1	0	1	-	-	-	-	-	-	-	-	-	-	-	-	-	-	-	-	-	-	-	-	-	-	-	-	-	-	-	-	-	-	-	-	-	-	-
4699714	C	T	MRSN4605_04405	N/A	.	NP_253471.1	hypothetical protein	snp	synonymous_variant	LOW	p.Gln41Gln	1	0	1	-	-	-	-	-	-	-	-	-	-	-	-	-	-	-	-	-	-	-	-	-	-	-	-	-	-	-	-	-	-	-	-	-	-	-
4805419	C	T	MRSN4605_04501	N/A	.		hypothetical protein	snp	synonymous_variant	LOW	p.Ile53Ile	1	1	0	-	-	-	-	-	-	-	-	-	-	-	-	-	-	-	-	-	-	-	-	-	-	-	-	-	-	+	-	-	-	-	-	-	-	-
4869957	C	A	MRSN4605_04560	N/A	.	NP_249799.1	putative major facilitator superfamily (MFS) transporter	snp	synonymous_variant	LOW	p.Gly373Gly	1	1	0	-	-	-	-	-	-	-	-	-	-	-	-	-	-	-	-	-	-	-	-	-	-	-	-	-	-	-	-	-	-	-	-	-	-	-
4941779	G	T	MRSN4605_04627	N/A	.		hypothetical protein	snp	synonymous_variant	LOW	p.Ile89Ile	1	1	0	-	-	-	-	-	-	-	-	-	-	-	-	-	-	-	-	-	-	-	-	-	-	-	-	-	-	-	-	-	-	-	-	-	-	-
5111629	C	A	MRSN4605_04805	N/A	.	NP_249566.1	hypothetical protein	snp	synonymous_variant	LOW	p.Pro298Pro	1	1	0	-	-	-	-	-	-	-	-	-	-	-	+	-	-	-	-	-	-	-	-	-	-	-	-	-	-	-	-	-	-	-	-	-	-	-
5452666	C	T	MRSN4605_05116	N/A	.	NP_249395.1	putative amidase	snp	synonymous_variant	LOW	p.Cys220Cys	1	0	1	-	-	-	-	-	-	-	-	-	-	-	-	-	-	-	-	-	-	-	-	-	-	-	-	-	-	-	-	-	-	-	-	-	-	-
5615735	G	A	MRSN4605_05252	N/A	.		hypothetical protein	snp	synonymous_variant	LOW	p.Leu374Leu	1	0	1	-	-	-	-	-	-	-	-	-	-	-	-	-	-	-	-	-	-	-	-	-	-	-	-	-	-	-	-	-	-	-	-	-	-	-
5642920	G	A	MRSN4605_05280	N/A	.	NP_253088.1	two-component sensor	snp	initiator_codon_variant	LOW	p.Met1?	1	1	0	-	-	-	-	-	-	-	-	-	-	-	-	-	-	-	-	-	-	-	-	-	-	-	-	-	-	-	-	-	-	-	-	-	-	-
5819945	C	T	MRSN4605_05451	N/A	.		hypothetical protein	snp	synonymous_variant	LOW	p.Ala65Ala	1	0	1	-	-	-	-	-	-	-	-	-	-	-	-	-	-	-	-	-	-	-	-	-	-	-	-	-	-	-	-	-	-	-	-	-	-	-
6027034	G	C	MRSN4605_05652	N/A	.	NP_253343.1	putative major facilitator superfamily (MFS) transporter	snp	synonymous_variant	LOW	p.Gly7Gly	1	1	0	-	-	-	-	-	-	-	-	-	-	-	-	-	-	-	-	-	-	-	-	-	-	-	-	-	-	-	-	-	-	-	-	-	-	-
7041731	G	A	MRSN4605_06567	N/A	.	NP_254208.1	putative short-chain dehydrogenase	snp	synonymous_variant	LOW	p.Leu205Leu	1	0	1	-	-	-	-	-	-	-	-	-	-	-	-	-	-	-	-	-	-	-	-	-	-	-	-	-	-	-	-	-	-	-	-	-	-	-
265638	A	T	MRSN4605_00234-MRSN4605_00235	N/A	.		hypothetical protein	snp	intergenic_region	MODIFIER		8	0	8	-	-	-	-	-	-	-	-	-	-	-	-	-	-	-	-	-	-	-	-	-	-	-	-	-	-	-	-	-	-	-	-	-	-	-
265619	G	A	MRSN4605_00234-MRSN4605_00235	N/A	.		hypothetical protein	snp	intergenic_region	MODIFIER		7	0	7	-	-	-	-	-	-	-	-	-	-	-	-	-	-	-	-	-	-	-	-	-	-	-	-	-	-	-	-	-	-	-	-	-	-	-
265613	G	A	MRSN4605_00234-MRSN4605_00235	N/A	.		hypothetical protein	snp	intergenic_region	MODIFIER		6	0	6	-	-	-	-	-	-	-	-	-	-	-	-	-	-	-	-	-	-	-	-	-	-	-	-	-	-	-	-	-	-	-	-	-	-	-
265601	G	C	MRSN4605_00234-MRSN4605_00235	N/A	.		hypothetical protein	snp	intergenic_region	MODIFIER		2	0	2	-	-	-	-	-	-	-	-	-	-	-	-	-	-	-	-	-	-	-	-	-	-	-	-	-	-	-	-	-	-	-	-	-	-	-
8342	G	A	MRSN4605_00006-MRSN4605_00007	N/A	.	NP_064726.1	hypothetical protein	snp	intergenic_region	MODIFIER		1	0	1	-	-	-	-	-	-	-	-	-	-	-	-	-	-	-	-	-	-	-	-	-	-	-	-	-	-	-	-	-	-	-	-	-	-	-
89624	C	T	MRSN4605_00073-MRSN4605_00074	N/A	.	NP_248759.1	hypothetical protein	snp	intergenic_region	MODIFIER		1	1	0	-	-	-	-	-	-	-	-	-	-	-	-	-	-	-	-	-	-	-	-	-	-	-	-	-	-	-	-	-	-	-	-	-	-	-
4738118	C	T	MRSN4605_04435	N/A	aaeB_4		p-hydroxybenzoic acid efflux pump subunit AaeB	snp	synonymous_variant	LOW	p.Glu148Glu	1	1	0	-	-	-	-	-	-	-	-	-	-	-	-	-	-	-	-	-	-	-	-	-	-	-	-	-	-	-	-	-	-	-	-	-	-	-
865048	C	T	MRSN4605_00809	N/A	acoR	NP_252836.1	transcriptional regulator AcoR	snp	synonymous_variant	LOW	p.Leu296Leu	1	0	1	-	-	-	-	-	-	-	-	-	-	-	-	-	-	-	-	-	-	-	-	-	-	-	-	-	-	-	-	-	-	-	-	-	-	-
1315934	C	T	MRSN4605_01247	N/A	aidA		Quorum-quenching protein AidA	snp	synonymous_variant	LOW	p.Tyr112Tyr	5	0	5	-	-	-	-	-	-	-	-	-	-	-	-	-	-	-	-	-	-	-	-	-	-	-	-	-	-	-	-	-	-	-	-	-	-	-
6818056	G	A	MRSN4605_06360	N/A	algC	NP_254009	phosphomannomutase AlgC	snp	synonymous_variant	LOW	p.Ala66Ala	1	0	1	-	-	-	-	-	-	-	-	-	-	-	-	-	-	-	-	-	-	-	-	-	-	-	-	-	-	-	-	-	-	-	-	-	-	-
3365381	C	T	MRSN4605_03105	N/A	ambE	NP_250992.1	AmbE	snp	synonymous_variant	LOW	p.Ala1517Ala	1	0	1	-	-	-	-	-	-	-	-	-	-	-	-	-	-	-	-	-	-	-	-	-	-	-	-	-	-	-	-	-	-	-	-	-	-	-
655396	G	A	MRSN4605_00604	N/A	amgK		N-acetylmuramate/N-acetylglucosamine kinase	snp	synonymous_variant	LOW	p.Arg88Arg	5	5	0	-	-	-	-	-	-	-	-	-	-	-	-	-	-	-	-	-	-	-	-	-	-	-	-	-	-	-	-	-	-	-	-	-	-	-
5780498	C	T	MRSN4605_05406	N/A	ampD	NP_253212.1	beta-lactamase expression regulator AmpD	snp	initiator_codon_variant	LOW	p.Met1?	1	0	1	-	-	-	-	-	-	-	-	-	-	-	-	-	-	-	-	-	-	-	-	-	-	-	-	-	-	-	-	-	-	-	-	-	-	-
3047044	C	T	MRSN4605_02888	N/A	antB	NP_251203.1	anthranilate dioxygenase small subunit	snp	synonymous_variant	LOW	p.Lys145Lys	6	6	0	-	-	-	-	-	-	-	-	-	-	-	-	-	-	-	-	-	-	-	-	-	-	-	-	-	-	-	-	-	-	-	-	-	-	-
1975217	G	C	MRSN4605_01841	N/A	apeB		putative M18 family aminopeptidase 2	snp	synonymous_variant	LOW	p.Pro17Pro	2	0	2	-	-	-	-	-	-	-	-	-	-	-	-	-	-	-	-	-	-	-	-	-	-	-	-	-	-	-	-	-	-	-	-	-	-	-
5093616	G	A	MRSN4605_04787	N/A	argR	NP_249584.1	transcriptional regulator ArgR	snp	synonymous_variant	LOW	p.Ala27Ala	21	0	21	-	-	-	-	-	-	-	-	-	-	-	-	-	-	-	-	-	-	-	-	-	-	-	-	-	-	-	-	-	-	-	-	-	-	-
5092788	G	A	MRSN4605_04787	N/A	argR	NP_249584.1	transcriptional regulator ArgR	snp	synonymous_variant	LOW	p.Gly303Gly	2	2	0	-	-	-	-	-	-	-	-	-	-	-	-	-	-	-	-	-	-	-	-	-	-	-	-	-	-	-	-	-	-	-	-	-	-	-
5286713	C	A	MRSN4605_04945	N/A	asrA	NP_249470.1	AsrA	snp	synonymous_variant	LOW	p.Ile215Ile	1	1	0	-	-	-	-	-	-	-	-	-	-	-	-	-	-	-	-	-	-	-	-	-	-	-	-	-	-	-	-	-	-	-	-	-	-	-
3756265	G	A	MRSN4605_03460	N/A	atoB	NP_250691.1	acetyl-CoA acetyltransferase	snp	synonymous_variant	LOW	p.Ala189Ala	5	0	5	-	-	-	-	-	-	-	-	-	-	-	-	-	-	-	-	-	-	-	-	-	-	-	-	-	-	-	-	-	-	-	-	-	-	-
2400220	G	A	MRSN4605_02253	N/A	atuG	NP_251582.1	GCase%2C alpha-subunit (biotin-containing)	snp	synonymous_variant	LOW	p.Arg101Arg	6	6	0	-	-	-	-	-	-	-	-	-	-	-	-	-	-	-	-	-	-	-	-	-	-	-	-	-	-	-	-	-	-	-	-	-	-	-
1484542	C	T	MRSN4605_01401	N/A	bcpA		Carboxyvinyl-carboxyphosphonate phosphorylmutase	snp	synonymous_variant	LOW	p.Thr169Thr	2	2	0	-	-	-	-	-	-	-	-	-	-	-	-	-	-	-	-	-	-	-	+	-	-	-	-	-	+	-	-	-	-	-	-	-	-	-
4618705	C	T	MRSN4605_04334	N/A	bdlA	NP_250114.1	BdlA	snp	synonymous_variant	LOW	p.Phe190Phe	1	0	1	-	-	-	-	-	-	-	-	-	-	-	-	-	-	-	-	-	-	-	-	-	-	-	-	-	-	-	-	-	-	-	-	-	-	-
6878568	C	G	MRSN4605_06418	N/A	betT1	NP_254062.1	BetT1	snp	synonymous_variant	LOW	p.Gly96Gly	1	1	0	-	-	-	-	-	-	-	-	-	-	-	-	-	-	-	-	-	-	-	-	-	-	-	-	-	-	-	-	-	-	-	-	-	-	-
4910758	C	G	MRSN4605_04598	N/A	braF	NP_249762.1	branched-chain amino acid transport protein BraF	snp	synonymous_variant	LOW	p.Thr45Thr	8	8	0	-	-	-	-	-	-	-	-	-	-	-	-	-	-	-	-	-	-	-	-	-	-	-	-	-	-	-	-	-	+	+	-	-	+	+
6146690	C	T	MRSN4605_05763	N/A	carB	NP_253444.1	carbamoylphosphate synthetase large subunit	snp	synonymous_variant	LOW	p.Leu399Leu	2	2	0	-	-	-	-	-	-	-	-	-	-	-	-	-	-	-	-	-	-	-	-	-	-	-	-	-	-	-	-	-	-	-	-	-	-	-
5798495	C	A	MRSN4605_05426	N/A	cdrB_1	NP_253314.1	cyclic diguanylate-regulated TPS partner B%2C CdrB	snp	synonymous_variant	LOW	p.Leu371Leu	2	2	0	-	-	-	-	-	-	-	-	-	-	-	-	-	-	-	-	-	-	-	-	-	-	-	-	-	-	-	-	-	-	-	-	-	-	-
2356418	T	C	MRSN4605_02210	N/A	cif	NP_251624.1	CFTR inhibitory factor%2C Cif	snp	synonymous_variant	LOW	p.Pro260Pro	2	2	0	-	-	-	-	-	-	-	-	-	-	-	-	-	-	-	-	-	-	-	-	-	-	-	-	-	-	-	-	-	-	-	-	-	-	-
2360276	C	T	MRSN4605_02213	N/A	cifR	NP_251621.1	CifR	snp	synonymous_variant	LOW	p.Arg193Arg	1	0	1	-	-	-	-	-	-	-	-	-	-	-	-	-	-	-	-	-	-	-	-	-	-	-	-	-	-	-	-	-	-	-	-	-	-	-
5891558	C	A	MRSN4605_05532	N/A	clpB	NP_253232.1	ClpB protein	snp	synonymous_variant	LOW	p.Arg189Arg	1	1	0	-	-	-	-	-	-	-	-	-	-	-	-	-	-	-	-	-	-	-	-	-	-	-	-	-	-	-	-	-	-	-	-	-	-	-
3277655	T	G	MRSN4605_03035	N/A	clpV3	NP_251061.1	ClpV3	snp	synonymous_variant	LOW	p.Leu649Leu	161	32	129	+	+	+	+	+	+	+	+	+	+	+	-	-	+	+	-	-	-	-	-	-	-	-	-	-	-	-	-	-	-	-	-	+	-	-
3599608	C	G	MRSN4605_03328	N/A	cupA4	NP_250821.1	fimbrial subunit CupA4	snp	synonymous_variant	LOW	p.Leu271Leu	7	7	0	-	-	-	-	-	-	-	-	-	-	-	-	-	-	-	-	-	-	-	-	-	-	-	-	-	-	-	-	-	-	-	-	-	-	-
3598416	C	T	MRSN4605_03327	N/A	cupA5	NP_250822.1	chaperone CupA5	snp	synonymous_variant	LOW	p.Val196Val	54	0	54	-	-	-	-	-	-	-	-	-	-	-	-	-	-	-	-	-	-	-	-	-	-	-	-	-	-	-	-	-	-	-	-	-	-	-
3698505	G	A	MRSN4605_03408	N/A	cynR	NP_250744.1	transcriptional regulator CynR	snp	synonymous_variant	LOW	p.Gly289Gly	1	0	1	-	-	-	-	-	-	-	-	-	-	-	-	-	-	-	-	-	-	-	-	-	-	-	-	-	-	-	-	-	-	-	-	-	-	-
3699120	C	T	MRSN4605_03408	N/A	cynR	NP_250744.1	transcriptional regulator CynR	snp	synonymous_variant	LOW	p.Glu84Glu	1	0	1	-	-	-	-	-	-	-	-	-	-	-	-	-	-	-	-	-	-	-	-	-	-	-	-	-	-	-	-	-	-	-	-	-	-	-
3947646	G	A	MRSN4605_03633	N/A	cysI	NP_250529.1	sulfite reductase	snp	synonymous_variant	LOW	p.Pro163Pro	2	2	0	-	-	-	-	-	-	-	-	-	-	-	-	-	-	-	-	-	-	-	-	-	-	-	-	-	-	-	-	-	-	-	-	-	-	-
4976570	G	C	MRSN4605_04664	N/A	dapA_2	NP_249701.1	dihydrodipicolinate synthase	snp	synonymous_variant	LOW	p.Arg83Arg	4	0	4	-	-	-	-	-	-	-	-	-	-	-	-	-	-	-	-	-	-	-	-	-	-	-	-	-	-	-	-	-	-	-	-	-	-	-
300715	C	T	MRSN4605_00265	N/A	davD	NP_248956.1	glutaric semialdehyde dehydrogenase	snp	synonymous_variant	LOW	p.Gly148Gly	31	0	31	-	-	-	-	-	-	-	-	-	-	-	-	-	-	-	-	-	-	-	-	-	-	-	-	-	-	-	-	-	-	-	-	-	-	-
5810229	T	C	MRSN4605_05436	N/A	dnaB_4	NP_253618.1	replicative DNA helicase	snp	synonymous_variant	LOW	p.His447His	1	0	1	-	-	-	-	-	-	-	-	-	-	-	-	-	-	-	-	-	-	-	-	-	-	-	-	-	-	-	-	-	-	-	-	-	-	-
1530295	C	T	MRSN4605_01443	N/A	dnaE	NP_252330.1	DNA polymerase III%2C alpha chain	snp	synonymous_variant	LOW	p.Gly60Gly	6	6	0	-	-	-	-	-	-	-	-	-	-	-	-	-	-	-	-	-	-	-	-	+	+	+	+	+	-	-	+	-	-	-	-	-	-	-
122844	C	T	MRSN4605_00099-MRSN4605_00100	N/A	eagT6	NP_248784.1	EagT6	snp	intergenic_region	MODIFIER		8	8	0	-	-	-	-	-	-	-	-	-	-	-	-	-	-	-	-	-	-	-	-	-	-	-	-	-	-	-	-	-	+	+	-	-	+	+
2336657	G	A	MRSN4605_02192	N/A	fabV	NP_251640.1	FabV	snp	synonymous_variant	LOW	p.Lys118Lys	1	0	1	-	-	-	-	-	-	-	-	-	-	-	-	-	-	-	-	-	-	-	-	-	-	-	-	-	-	-	-	-	-	-	-	-	-	-
6650622	G	A	MRSN4605_06204	N/A	fabY	NP_253861.1	beta-acetoacetyl-acyl carrier protein synthase FabY	snp	synonymous_variant	LOW	p.Val612Val	8	0	8	-	-	-	-	-	-	-	-	-	-	-	-	-	-	-	-	-	-	-	-	-	-	-	-	-	-	-	-	-	-	-	-	-	-	-
3918418	C	A	MRSN4605_03603	N/A	fan1		Fanconi-associated nuclease 1	snp	synonymous_variant	LOW	p.Pro499Pro	24	0	24	-	-	-	-	-	-	-	-	-	-	-	-	-	-	-	-	-	-	-	-	-	-	-	-	-	-	-	-	-	-	-	-	-	-	-
2729541	T	C	MRSN4605_02591	N/A	fhpR##	NP_251355.1	Transcriptional activator of P. aeruginosa flavohemoglobin%2C FhpR	snp	synonymous_variant	LOW	p.Gln478Gln	8	8	0	-	-	-	-	-	-	-	-	-	-	-	-	-	-	-	-	-	-	-	-	-	-	-	-	-	-	-	-	-	+	+	-	-	+	+
533062	C	A	MRSN4605_00477	N/A	fiuA	NP_249161.1	Ferrichrome receptor FiuA	snp	synonymous_variant	LOW	p.Val34Val	51	0	51	-	-	-	-	-	-	-	-	-	-	-	-	-	-	-	-	-	-	-	-	-	-	-	-	-	-	-	-	-	-	-	-	-	-	-
6187085	C	T	MRSN4605_05804	N/A	gcvH		Glycine cleavage system H protein	snp	synonymous_variant	LOW	p.Arg78Arg	2	2	0	-	-	-	-	-	-	-	-	-	-	-	-	-	-	-	-	-	-	-	+	-	-	-	-	-	+	-	-	-	-	-	-	-	-	-
6920844	G	T	MRSN4605_06459	N/A	glyA1	NP_254102.1	serine hydroxymethyltransferase	snp	synonymous_variant	LOW	p.Ala46Ala	1	0	1	-	-	-	-	-	-	-	-	-	-	-	-	-	-	-	-	-	-	-	-	-	-	-	-	-	-	-	-	-	-	-	-	-	-	-
1784230	G	A	MRSN4605_01665	N/A	hasE	NP_252095.1	metalloprotease secretion protein	snp	synonymous_variant	LOW	p.Arg336Arg	4	4	0	-	-	-	-	-	-	-	-	-	-	-	-	-	-	-	-	-	-	-	-	-	-	-	-	-	-	-	-	-	-	-	-	-	-	-
6348995	G	T	MRSN4605_05957	N/A	hflK	NP_253629.1	protease subunit HflK	snp	synonymous_variant	LOW	p.Ala361Ala	10	0	10	-	-	-	-	-	-	-	-	-	-	-	-	-	-	-	-	-	-	-	-	-	-	-	-	-	-	-	-	-	-	-	-	-	-	-
5486868	C	T	MRSN4605_05135	N/A	hxcQ	NP_249376.1	HxcQ	snp	synonymous_variant	LOW	p.Ala92Ala	1	0	1	-	-	-	-	-	-	-	-	-	-	-	-	-	-	-	-	-	-	-	-	-	-	-	-	-	-	-	-	-	-	-	-	-	-	-
2607095	T	C	MRSN4605_02484	N/A	infC	NP_251433.1	translation initiation factor IF-3	snp	synonymous_variant	LOW	p.Ile25Ile	1	0	1	-	-	-	-	-	-	-	-	-	-	-	-	-	-	-	-	-	-	-	-	-	-	-	-	-	-	-	-	-	-	-	-	-	-	-
5068994	C	T	MRSN4605_04760	N/A	kup	NP_249608.1	potassium uptake protein Kup	snp	synonymous_variant	LOW	p.Val366Val	1	0	1	-	-	-	-	-	-	-	-	-	-	-	-	-	-	-	-	-	-	-	-	-	-	-	-	-	-	-	-	-	-	-	-	-	-	-
4597955	C	T	MRSN4605_04317	N/A	lasR	NP_250121.1	transcriptional regulator LasR	snp	synonymous_variant	LOW	p.Val208Val	1	0	1	-	-	-	-	-	-	-	-	-	-	-	-	-	-	-	-	-	-	-	-	-	-	-	-	-	-	-	-	-	-	-	-	-	-	-
4711065	G	T	MRSN4605_04416	N/A	lhpC	NP_249945.1	delta1-pyrroline-4-hydroxy-2-carboxylate deaminase%2C LphC	snp	synonymous_variant	LOW	p.Gly191Gly	1	1	0	-	-	-	-	-	-	-	-	-	-	-	-	-	-	-	-	-	-	-	-	-	-	-	-	-	-	-	-	-	-	-	-	-	-	-
1946301	G	T	MRSN4605_01811	N/A	lplT		Lysophospholipid transporter LplT	snp	synonymous_variant	LOW	p.Val329Val	2	2	0	-	-	-	-	-	-	-	-	-	-	-	-	-	-	-	-	-	-	-	-	-	-	-	-	-	-	-	-	-	-	-	-	-	-	-
1316944	G	A	MRSN4605_01248	N/A	lptF_1	NP_252517.1	Lipopolysaccharide export system permease protein LptF	snp	synonymous_variant	LOW	p.Gly77Gly	1	1	0	-	-	-	-	-	-	-	-	-	-	-	-	-	-	-	-	-	-	-	-	-	-	-	-	-	-	-	-	-	-	-	-	-	-	-
5742562	G	T	MRSN4605_05375	N/A	magA	NP_253182.1	MagA	snp	synonymous_variant	LOW	p.Val186Val	2	0	2	-	-	-	-	-	-	-	-	-	-	-	-	-	-	-	-	-	-	-	-	-	-	-	-	-	-	-	-	-	-	-	-	-	-	-
3479140	C	A	MRSN4605_03218	N/A	mdtC		Multidrug resistance protein MdtC	snp	synonymous_variant	LOW	p.Leu250Leu	8	8	0	-	-	-	-	-	-	-	-	-	-	-	-	-	-	-	-	-	-	+	-	+	+	+	+	+	-	-	+	-	-	-	-	-	-	-
1278087	C	T	MRSN4605_01210	N/A	moaA1	NP_252559.1	molybdopterin biosynthetic protein A1	snp	synonymous_variant	LOW	p.Asn135Asn	1	1	0	-	-	-	-	-	-	-	-	-	-	-	-	-	-	-	-	-	-	-	-	-	-	-	-	-	-	-	-	-	-	-	-	-	-	-
2359327	G	T	MRSN4605_02212	N/A	morB	NP_251622.1	morphinone reductase	snp	synonymous_variant	LOW	p.Gly82Gly	127	0	127	-	-	-	-	-	-	-	-	-	-	-	-	-	-	-	-	-	-	-	-	-	-	-	-	-	-	-	-	-	-	-	-	-	-	-
3645789	G	C	MRSN4605_03370	N/A	msuD_4	NP_251046.1	methanesulfonate sulfonatase MsuD	snp	synonymous_variant	LOW	p.Ala38Ala	3	3	0	-	-	-	-	-	-	-	-	-	-	-	-	-	-	-	-	-	-	-	-	-	-	-	-	-	-	-	-	-	-	-	-	-	-	-
2427463	C	T	MRSN4605_02279	N/A	mttC	NP_251556.1	secretion protein MttC	snp	synonymous_variant	LOW	p.Arg258Arg	3	0	3	-	-	-	-	-	-	-	-	-	-	-	-	-	-	-	-	-	-	-	-	-	-	-	-	-	-	-	-	-	-	-	-	-	-	-
5300634	G	A	MRSN4605_04959	N/A	mucC	NP_249456.1	positive regulator for alginate biosynthesis MucC	snp	synonymous_variant	LOW	p.Ser59Ser	1	0	1	-	-	-	-	-	-	-	-	-	-	-	-	-	-	-	-	-	-	-	-	-	-	-	-	-	-	-	-	-	-	-	-	-	-	-
5299875	C	T	MRSN4605_04958	N/A	mucD	NP_249457.1	serine protease MucD precursor	snp	synonymous_variant	LOW	p.Val147Val	21	0	21	-	-	-	-	-	-	-	-	-	-	-	-	-	-	-	-	-	-	-	-	-	-	-	-	-	-	-	-	-	-	-	-	-	-	-
582109	C	T	MRSN4605_00530	N/A	norB	NP_249215.1	nitric-oxide reductase subunit B	snp	synonymous_variant	LOW	p.Gly6Gly	7	7	0	-	-	-	-	-	-	-	-	-	-	-	-	-	-	-	-	-	-	-	-	-	-	-	-	-	-	-	-	-	-	-	-	-	-	-
479616	G	T	MRSN4605_00434	N/A	oprM	NP_249118.1	Major intrinsic multiple antibiotic resistance efflux outer membrane protein OprM precursor	snp	synonymous_variant	LOW	p.Leu390Leu	8	8	0	-	-	-	-	-	-	-	-	-	-	-	-	-	-	-	-	-	-	-	-	-	-	-	-	-	-	-	-	-	+	+	-	-	+	+
3397562	G	A	MRSN4605_03135	N/A	pbpC	NP_250962.1	penicillin-binding protein 3A	snp	synonymous_variant	LOW	p.Arg195Arg	7	0	7	-	-	-	-	-	-	-	-	-	-	-	-	-	-	-	-	-	-	-	-	-	-	-	-	-	-	-	-	-	-	-	-	-	-	-
759918	C	T	MRSN4605_00724	N/A	pchE	NP_252916.1	dihydroaeruginoic acid synthetase	snp	synonymous_variant	LOW	p.Ser243Ser	3	0	3	-	-	-	-	-	-	-	-	-	-	-	-	-	-	-	-	-	-	-	-	-	-	-	-	-	-	-	-	-	-	-	-	-	-	-
5476498	G	A	MRSN4605_05131	N/A	pdtA	NP_249381.1	phosphate depletion regulated TPS partner A%2C PdtA	snp	synonymous_variant	LOW	p.Leu1242Leu	5	5	0	-	-	-	-	-	-	-	-	-	-	-	-	-	-	-	-	-	-	-	-	-	-	-	-	-	-	-	-	-	-	-	-	-	-	-
6090275	G	A	MRSN4605_05711	N/A	phuV	NP_253394.1	PhuV	snp	synonymous_variant	LOW	p.Arg186Arg	5	5	0	-	-	-	-	-	-	-	-	-	-	-	-	-	-	-	-	-	-	-	-	-	-	-	-	-	-	-	-	-	-	-	-	-	-	-
779224	C	T	MRSN4605_00733	N/A	phzS	NP_252907.1	flavin-containing monooxygenase	snp	synonymous_variant	LOW	p.Leu259Leu	1	1	0	-	-	-	-	-	-	-	-	-	-	-	-	-	-	-	-	-	-	-	-	-	-	-	-	-	-	-	-	-	-	-	-	-	-	-
6129693	T	C	MRSN4605_05746	N/A	pnp	NP_253428.1	polyribonucleotide nucleotidyltransferase	snp	synonymous_variant	LOW	p.Glu195Glu	5	5	0	-	-	-	-	-	-	-	-	-	-	-	-	-	-	-	-	-	-	-	-	-	-	-	-	-	-	-	-	-	-	-	-	-	-	-
6488546	G	A	MRSN4605_06063	N/A	ponA	NP_253732.1	penicillin-binding protein 1A	snp	synonymous_variant	LOW	p.Gln642Gln	1	0	1	-	-	-	-	-	-	-	-	-	-	-	-	-	-	-	-	-	-	-	-	-	-	-	-	-	-	-	-	-	-	-	-	-	-	-
3432695	G	A	MRSN4605_03167	N/A	pslK	NP_250931.1	PslL	snp	synonymous_variant	LOW	p.Tyr166Tyr	21	0	21	-	-	-	-	-	-	-	-	-	-	-	-	-	-	-	-	-	-	-	-	-	-	-	-	-	-	-	-	-	-	-	-	-	-	-
3260431	C	T	MRSN4605_03021	N/A	pvdA	NP_251076.1	L-ornithine N5-oxygenase	snp	synonymous_variant	LOW	p.Tyr126Tyr	6	0	6	-	-	-	-	-	-	-	-	-	-	-	-	-	-	-	-	-	-	-	-	-	-	-	-	-	-	-	-	-	-	-	-	-	-	-
3218349	G	A	MRSN4605_03006	N/A	pvdI	NP_251092.1	pyoverdine peptide synthetase	snp	synonymous_variant	LOW	p.Arg1217Arg	1	1	0	-	-	-	-	-	-	-	-	-	-	-	-	-	-	-	-	-	-	-	-	-	-	-	-	-	-	-	-	-	-	-	-	-	-	-
5003120	C	T	MRSN4605_04689	N/A	pyoS5	NP_249676.1	pyocin S5	snp	synonymous_variant	LOW	p.Ala290Ala	6	6	0	-	-	-	-	-	-	-	-	-	-	-	-	-	-	-	-	-	-	-	-	-	-	-	-	-	-	-	-	-	-	-	-	-	-	-
5969463	C	T	MRSN4605_05602	N/A	radA	NP_253299.1	DNA repair protein RadA	snp	synonymous_variant	LOW	p.Gln446Gln	1	0	1	-	-	-	-	-	-	-	-	-	-	-	-	-	-	-	-	-	-	-	-	-	-	-	-	-	-	-	-	-	-	-	-	-	-	-
5912765	C	T	MRSN4605_05552	N/A	ribF	NP_253251.1	riboflavin kinase/FAD synthase	snp	synonymous_variant	LOW	p.Glu44Glu	1	1	0	-	-	-	-	-	-	-	-	-	-	-	-	-	-	-	-	-	-	-	-	-	-	-	-	-	-	-	-	-	-	-	-	-	-	-
3144952	G	A	MRSN4605_02954	N/A	sdaA	NP_251133.1	L-serine dehydratase	snp	synonymous_variant	LOW	p.Ala77Ala	2	0	2	-	-	-	-	-	-	-	-	-	-	-	-	-	-	-	-	-	-	-	-	-	-	-	-	-	-	-	-	-	-	-	-	-	-	-
5649521	C	G	MRSN4605_05285	N/A	secA	NP_253093.1	secretion protein SecA	snp	synonymous_variant	LOW	p.Val672Val	5	5	0	-	-	-	-	-	-	-	-	-	-	-	-	-	-	-	-	-	-	-	-	-	-	-	-	-	-	-	-	-	-	-	-	-	-	-
743044	C	G	MRSN4605_00707	N/A	secY	NP_252933.1	secretion protein SecY	snp	synonymous_variant	LOW	p.Thr399Thr	21	0	21	-	-	-	-	-	-	-	-	-	-	-	-	-	-	-	-	-	-	-	-	-	-	-	-	-	-	-	-	-	-	-	-	-	-	-
6922318	G	A	MRSN4605_06460	N/A	soxB	NP_254103.1	sarcosine oxidase beta subunit	snp	synonymous_variant	LOW	p.Leu91Leu	17	17	0	+	+	+	+	+	+	+	+	+	+	+	-	-	+	+	-	-	-	-	-	-	-	-	-	-	-	-	-	-	-	-	-	+	-	-
3086007	C	T	MRSN4605_02927	N/A	sphA_1	NP_254012.1	SphA	snp	synonymous_variant	LOW	p.Leu129Leu	1	0	1	-	-	-	-	-	-	-	-	-	-	-	-	-	-	-	-	-	-	-	-	-	-	-	-	-	-	-	-	-	-	-	-	-	-	-
3688762	C	T	MRSN4605_03401	N/A	sppD	NP_250751.1	ABC transporter ATP-binding protein%2C SppD	snp	synonymous_variant	LOW	p.Leu54Leu	1	0	1	-	-	-	-	-	-	-	-	-	-	-	-	-	-	-	-	-	-	-	-	-	-	-	-	-	-	-	-	-	-	-	-	-	-	-
5535897	GG	AA	MRSN4605_05174	N/A	tadG	NP_252987.1	TadG	mnp	synonymous_variant	LOW	p.134	2	2	0	-	-	-	-	-	-	-	-	-	-	-	-	-	-	-	-	-	-	-	-	-	-	+	+	-	-	-	-	-	-	-	-	-	-	-
2492764	G	A	MRSN4605_02353	N/A	tal	NP_251486.1	transaldolase	snp	synonymous_variant	LOW	p.Asp186Asp	8	0	8	-	-	-	-	-	-	-	-	-	-	-	-	-	-	-	-	-	-	-	-	-	-	-	-	-	-	-	-	-	-	-	-	-	-	-
2774361	G	T	MRSN4605_02632	N/A	trmU	NP_251316.1	tRNA methyltransferase	snp	synonymous_variant	LOW	p.Arg183Arg	1	0	1	-	-	-	-	-	-	-	-	-	-	-	-	-	-	-	-	-	-	-	-	-	-	-	-	-	-	-	-	-	-	-	-	-	-	-
1236187	G	A	MRSN4605_01170	N/A	tseT	NP_252596.1	TOX-REase-5 domain-containing effector%2C TseT	snp	synonymous_variant	LOW	p.Ala211Ala	2	2	0	-	-	-	-	-	-	-	-	-	-	-	-	-	-	-	-	-	-	-	-	-	-	-	-	-	-	-	-	-	-	-	-	-	-	-
6852668	G	A	MRSN4605_06396	N/A	ubiA	NP_254045.1	4-hydroxybenzoate-octaprenyl transferase	snp	synonymous_variant	LOW	p.Leu224Leu	51	0	51	-	-	-	-	-	-	-	-	-	-	-	-	-	-	-	-	-	-	-	-	-	-	-	-	-	-	-	-	-	-	-	-	-	-	-
120069	C	A	MRSN4605_00095	N/A	vgrG1	NP_248781.1	VgrG1	snp	synonymous_variant	LOW	p.Ser615Ser	21	0	21	-	-	-	-	-	-	-	-	-	-	-	-	-	-	-	-	-	-	-	-	-	-	-	-	-	-	-	-	-	-	-	-	-	-	-
120015	C	G	MRSN4605_00095	N/A	vgrG1	NP_248781.1	VgrG1	snp	synonymous_variant	LOW	p.Leu597Leu	1	0	1	-	-	-	-	-	-	-	-	-	-	-	-	-	-	-	-	-	-	-	-	-	-	-	-	-	-	-	-	-	-	-	-	-	-	-
1914309	C	T	MRSN4605_01783	N/A	vgrG4a	NP_251984.1	VgrG4a	snp	synonymous_variant	LOW	p.Leu611Leu	2	0	2	-	-	-	-	-	-	-	-	-	-	-	-	-	-	-	-	-	-	-	-	-	-	-	-	-	-	-	-	-	-	-	-	-	-	-
6081910	A	G	MRSN4605_05703	N/A	yqcC		putative protein YqcC	snp	synonymous_variant	LOW	p.Arg20Arg	2	0	2	-	-	-	-	-	-	-	-	-	-	-	-	-	-	-	-	-	-	-	-	-	-	-	-	-	-	-	-	-	-	-	-	-	-	-
[truncated: 218 more columns]
