# Supplementary material for: Detecting, mapping, and suppressing the spread of a decade-long Pseudomonas aeruginosa nosocomial outbreak with genomics
Source: bioRxiv preprint, doi:10.1101/2023.07.24.550326, version 3 (2025-06-30)
Supplement: Supplemental Table 7 [file 550326_file14.xlsx]

## Sheet: Filtered-complete
Locus tag	Name	RefSeq	Function	Variant	Impact	AA change	No of isolates	No of SC1 isolates	No of SC2 isolates	MRSN10240	MRSN10241	MRSN10242	MRSN11335	MRSN11376	MRSN11488	MRSN11536	MRSN11537	MRSN11934	MRSN11978	MRSN11980	MRSN12426	MRSN12427	MRSN12428	MRSN14550	MRSN15738	MRSN16340	MRSN16343	MRSN16382	MRSN16386	MRSN16388	MRSN16389	MRSN16390	MRSN16391	MRSN16395	MRSN17460	MRSN19760	MRSN19762	MRSN22475	MRSN22477	MRSN22479	MRSN22524	MRSN22525	MRSN22526	MRSN22527	MRSN22528	MRSN22529	MRSN23194	MRSN23253	MRSN23256
MRSN4605_00062	dsbM_1	NP_248748.1	DsbM	missense variant	MODERATE	p.Gly198Cys	8	0	8	-	-	-	-	-	-	-	-	-	-	-	-	-	-	-	-	-	-	-	-	-	-	-	-	-	-	-	-	-	-	-	-	-	-	-	-	-	-	-	-
MRSN4605_00359	pfpI	NP_249046.1	protease PfpI	frameshift variant	HIGH	p.Ala121fs	1	0	1	-	-	-	-	-	-	-	-	-	-	-	-	-	-	-	-	-	-	-	-	-	-	-	-	-	-	-	-	-	-	-	-	-	-	-	-	-	-	-	-
MRSN4605_00432	mexA	NP_249116.1	Resistance-Nodulation-Cell Division (RND) multidrug efflux membrane fusion protein MexA precursor	stop gained	HIGH	p.Gln353*	1	0	1	-	-	-	-	-	-	-	-	-	-	-	-	-	-	-	-	-	-	-	-	-	-	-	-	-	-	-	-	-	-	-	-	-	-	-	-	-	-	-	-
MRSN4605_00432	mexA	NP_249116.1	Resistance-Nodulation-Cell Division (RND) multidrug efflux membrane fusion protein MexA precursor	missense variant	MODERATE	p.Arg67His	1	0	1	-	-	-	-	-	-	-	-	-	-	-	-	-	-	-	-	-	-	-	-	-	-	-	-	-	-	-	-	-	-	-	-	-	-	-	-	-	-	-	-
MRSN4605_00681	rpoC	NP_252959.1	DNA-directed RNA polymerase beta* chain	missense variant	MODERATE	p.Asp1063His	1	1	0	-	-	-	-	-	-	-	-	-	-	-	-	-	-	-	-	-	-	-	-	-	-	-	-	-	-	-	-	-	-	-	-	-	-	-	-	-	-	-	-
MRSN4605_00712	rpoA	NP_252928.1	DNA-directed RNA polymerase alpha chain	missense variant	MODERATE	p.Ala307Asp	11	0	11	-	-	-	-	-	-	-	-	-	-	-	-	-	-	-	-	-	-	-	-	-	-	-	-	-	-	-	-	-	-	-	-	-	-	-	-	-	-	-	-
MRSN4605_00910	ampR	NP_252798.1	transcriptional regulator AmpR	missense variant	MODERATE	p.Asp135Glu	24	0	24	-	-	-	-	-	-	-	-	-	-	-	-	-	-	-	-	-	-	-	-	-	-	-	-	-	-	-	-	-	-	-	-	-	-	-	-	-	-	-	-
MRSN4605_01058	mpl	NP_252709.1	UDP-N-acetylmuramate:L-alanyl-gamma-D-glutamyl-me so-diaminopimelate ligase	missense variant	MODERATE	p.Trp247Arg	4	0	4	-	-	-	-	-	-	-	-	-	-	-	-	-	-	-	-	-	-	-	-	-	-	-	-	-	-	-	-	-	-	-	-	-	-	-	-	-	-	-	-
MRSN4605_01058	mpl	NP_252709.1	UDP-N-acetylmuramate:L-alanyl-gamma-D-glutamyl-me so-diaminopimelate ligase	frameshift variant	HIGH	p.Met38fs	3	3	0	-	-	-	-	-	-	-	-	-	-	-	-	-	-	-	-	-	-	-	-	-	-	-	-	-	-	-	-	-	-	-	-	-	-	-	-	-	-	-	-
MRSN4605_01058	mpl	NP_252709.1	UDP-N-acetylmuramate:L-alanyl-gamma-D-glutamyl-me so-diaminopimelate ligase	disruptive inframe deletion	MODERATE	p.Thr118del	1	0	1	-	-	-	-	-	-	-	-	-	-	-	-	-	-	-	-	-	-	-	-	-	-	-	-	-	-	-	-	-	-	-	-	-	-	-	-	-	-	-	-
MRSN4605_01058	mpl	NP_252709.1	UDP-N-acetylmuramate:L-alanyl-gamma-D-glutamyl-me so-diaminopimelate ligase	missense variant	MODERATE	p.Asn185Ser	1	0	1	-	-	-	-	-	-	-	-	-	-	-	-	-	-	-	-	-	-	-	-	-	-	-	-	-	-	-	-	-	-	-	-	-	-	-	-	-	-	-	-
MRSN4605_01407	mexK	NP_252366.1	MexK	frameshift variant	HIGH	p.Arg964fs	1	0	1	-	-	-	-	-	-	-	-	-	-	-	-	-	-	-	-	-	-	-	-	-	-	-	-	-	-	-	-	-	-	-	-	-	-	-	-	-	-	-	-
MRSN4605_01407	mexK	NP_252366.1	MexK	missense variant	MODERATE	p.Pro775Arg	1	1	0	-	-	-	-	-	-	-	-	-	-	-	-	-	-	-	-	-	-	-	-	-	-	-	-	-	-	-	-	-	-	-	-	-	-	-	-	-	-	-	-
MRSN4605_01921	gyrA	NP_251858.1	DNA gyrase subunit A	missense variant	MODERATE	p.Gly289Ser	3	3	0	-	-	-	-	-	-	-	-	-	-	-	-	-	-	-	-	-	-	-	-	-	-	-	-	-	-	-	-	-	-	-	-	-	-	-	-	-	-	-	-
MRSN4605_01921	gyrA	NP_251858.1	DNA gyrase subunit A	missense variant	MODERATE	p.Asn87Asp	1	0	1	-	-	-	-	-	-	-	-	-	-	-	-	-	-	-	-	-	-	-	-	-	-	-	-	-	-	-	-	-	-	-	-	-	-	-	-	-	-	-	-
MRSN4605_01941	wbpM	NP_251831.1	nucleotide sugar epimerase/dehydratase WbpM	conservative inframe deletion	MODERATE	p.Tyr647del	4	0	4	-	-	-	-	-	-	-	-	-	-	-	-	-	-	-	-	-	-	-	-	-	-	-	-	-	-	-	-	-	-	-	-	-	-	-	-	-	-	-	-
MRSN4605_02093	.	NP_251737.1	putative D-alanyl-D-alanine carboxypeptidase	missense variant	MODERATE	p.Leu204Gln	1	0	1	-	-	-	-	-	-	-	-	-	-	-	-	-	-	-	-	-	-	-	-	-	-	-	-	-	-	-	-	-	-	-	-	-	-	-	-	-	-	-	-
MRSN4605_02339	copS_1	NP_251500.1	two-component sensor 2C CopS	missense variant	MODERATE	p.Val26Ala	8	8	0	-	-	-	-	-	-	-	-	-	-	-	-	-	-	-	-	-	-	-	-	-	-	-	-	-	-	-	-	-	+	+	-	-	+	+	+	-	-	-	-
MRSN4605_02879	czcC_2	NP_251212.1	outer membrane protein precursor CzcC	missense variant	MODERATE	p.Gln195His	8	8	0	-	-	-	-	-	-	-	-	-	-	-	-	-	-	-	-	-	-	-	-	-	-	-	-	-	-	-	-	-	+	+	-	-	+	+	+	-	-	-	-
MRSN4605_02910	mexS	NP_251181.1	MexS	missense variant	MODERATE	p.Gly129Ser	1	0	1	-	-	-	-	-	-	-	-	-	-	-	-	-	-	-	-	-	-	-	-	-	-	-	-	-	-	-	-	-	-	-	-	-	-	-	-	-	-	-	-
MRSN4605_03391	fusA2	NP_250761.1	elongation factor G	missense variant	MODERATE	p.Glu178Asp	6	0	6	-	-	-	-	-	-	-	-	-	-	-	-	-	-	-	-	-	-	-	-	-	-	-	-	-	-	-	-	-	-	-	-	-	-	-	-	-	-	-	-
MRSN4605_03391	fusA2	NP_250761.1	elongation factor G	missense variant	MODERATE	p.Asn236Ser	1	1	0	-	-	-	-	-	-	-	-	-	-	-	-	-	-	-	-	-	-	-	-	-	-	-	-	-	-	-	-	-	-	-	-	-	-	-	-	-	-	-	-
MRSN4605_03441	mexX	NP_250709.1	Resistance-Nodulation-Cell Division (RND) multidrug efflux membrane fusion protein MexX precursor	stop gained	HIGH	p.Glu25*	4	4	0	-	-	-	-	-	-	-	-	-	-	-	-	-	-	-	-	-	-	-	-	-	-	-	-	-	-	-	-	-	-	-	-	-	-	-	-	-	-	-	-
MRSN4605_03441	mexX	NP_250709.1	Resistance-Nodulation-Cell Division (RND) multidrug efflux membrane fusion protein MexX precursor	stop gained	HIGH	p.Trp347*	2	2	0	-	-	-	-	-	-	-	-	-	-	-	-	-	-	-	-	-	-	-	-	-	-	-	-	-	-	-	-	-	-	-	-	-	-	-	-	-	-	-	-
MRSN4605_03442	mexY	NP_250708.1	Resistance-Nodulation-Cell Division (RND) multidrug efflux transporter MexY	frameshift variant	HIGH	p.Gly256fs	5	0	5	-	-	-	-	-	-	-	-	-	-	-	-	-	-	-	-	-	-	-	-	-	-	-	-	-	-	-	-	-	-	-	-	-	-	-	-	-	-	-	-
MRSN4605_03442	mexY	NP_250708.1	Resistance-Nodulation-Cell Division (RND) multidrug efflux transporter MexY	frameshift variant	HIGH	p.Thr804fs	1	0	1	-	-	-	-	-	-	-	-	-	-	-	-	-	-	-	-	-	-	-	-	-	-	-	-	-	-	-	-	-	-	-	-	-	-	-	-	-	-	-	-
MRSN4605_03455	.	NP_250696.1	putative major facilitator superfamily (MFS) transporter	missense variant	MODERATE	p.Leu311Val	3	3	0	-	-	-	-	-	-	-	-	-	-	-	-	-	-	-	-	-	-	-	-	-	-	-	-	-	-	-	-	-	-	-	-	-	-	-	-	-	-	-	-
MRSN4605_03674	parS	NP_250489.1	two-component sensor 2C ParS	missense variant	MODERATE	p.Thr213Ser	3	0	3	-	-	-	-	-	-	-	-	-	-	-	-	-	-	-	-	-	-	-	-	-	-	-	-	-	-	-	-	-	-	-	-	-	-	-	-	-	-	-	-
MRSN4605_04487	phoQ	NP_249871.1	two-component sensor PhoQ	frameshift variant	HIGH	p.Glu77fs	2	2	0	-	-	-	-	-	-	-	-	-	-	-	-	-	-	-	-	-	-	-	-	-	-	-	-	-	-	-	-	-	-	-	-	-	-	-	-	-	-	-	-
MRSN4605_04715	oprD	NP_249649.3	Basic amino acid 2C basic peptide and imipenem outer membrane porin OprD precursor	stop gained	HIGH	R6*	115	0	115	-	-	-	-	-	-	-	-	-	-	-	-	-	-	-	-	-	-	-	-	-	-	-	-	-	-	-	-	-	-	-	-	-	-	-	-	-	-	-	-
MRSN4605_04715	oprD	NP_249649.4	Basic amino acid 2C basic peptide and imipenem outer membrane porin OprD precursor	frameshift variant	HIGH	R318*	92	92	0	-	-	-	-	-	-	-	-	-	-	-	+	+	-	-	+	+	+	+	+	+	+	+	+	+	+	+	+	+	+	+	+	-	+	+	+	+	+	+	+
MRSN4605_04715	oprD	NP_249649.5	Basic amino acid 2C basic peptide and imipenem outer membrane porin OprD precursor	frameshift variant	HIGH	R260*	31	31	0	+	+	+	+	+	+	+	+	+	+	+	-	-	+	+	-	-	-	-	-	-	-	-	-	-	-	-	-	-	-	-	-	+	-	-	-	-	-	-	-
MRSN4605_04715	oprD	NP_249649.2	Basic amino acid 2C basic peptide and imipenem outer membrane porin OprD precursor	frameshift variant	HIGH	Indel	11	0	11	-	-	-	-	-	-	-	-	-	-	-	-	-	-	-	-	-	-	-	-	-	-	-	-	-	-	-	-	-	-	-	-	-	-	-	-	-	-	-	-
MRSN4605_04715	oprD	NP_249649.6	Basic amino acid 2C basic peptide and imipenem outer membrane porin OprD precursor	frameshift variant	HIGH	R432*	1	0	1	-	-	-	-	-	-	-	-	-	-	-	-	-	-	-	-	-	-	-	-	-	-	-	-	-	-	-	-	-	-	-	-	-	-	-	-	-	-	-	-
MRSN4605_04715	oprD	NP_249649.7	Basic amino acid 2C basic peptide and imipenem outer membrane porin OprD precursor	missense variant	MODERATE	R6Y	1	0	1	-	-	-	-	-	-	-	-	-	-	-	-	-	-	-	-	-	-	-	-	-	-	-	-	-	-	-	-	-	-	-	-	-	-	-	-	-	-	-	-
MRSN4605_05193	mvaT	NP_253005.1	transcriptional regulator MvaT 2C P16 subunit	missense variant	MODERATE	p.Gly98Ser	32	32	0	-	-	-	-	-	-	-	-	-	-	-	+	+	-	-	-	+	+	-	-	-	-	-	-	-	-	+	-	+	-	-	+	-	-	-	-	+	+	+	+
MRSN4605_05193	mvaT	NP_253005.1	transcriptional regulator MvaT 2C P16 subunit	missense variant	MODERATE	p.Gln84Pro	2	0	2	-	-	-	-	-	-	-	-	-	-	-	-	-	-	-	-	-	-	-	-	-	-	-	-	-	-	-	-	-	-	-	-	-	-	-	-	-	-	-	-
MRSN4605_05256	mexW	NP_253065.1	Resistance-Nodulation-Cell Division (RND) multidrug efflux transporter MexW	missense variant	MODERATE	p.Gly903Ser	3	0	3	-	-	-	-	-	-	-	-	-	-	-	-	-	-	-	-	-	-	-	-	-	-	-	-	-	-	-	-	-	-	-	-	-	-	-	-	-	-	-	-
MRSN4605_05261	colS	NP_253070.1	two-component sensor ColS	missense variant	MODERATE	p.Arg211His	3	0	3	-	-	-	-	-	-	-	-	-	-	-	-	-	-	-	-	-	-	-	-	-	-	-	-	-	-	-	-	-	-	-	-	-	-	-	-	-	-	-	-
MRSN4605_05261	colS	NP_253070.1	two-component sensor ColS	missense variant	MODERATE	p.Ala155Val	3	0	3	-	-	-	-	-	-	-	-	-	-	-	-	-	-	-	-	-	-	-	-	-	-	-	-	-	-	-	-	-	-	-	-	-	-	-	-	-	-	-	-
MRSN4605_05262	colR	NP_253071.1	two-component response regulator ColR	frameshift variant&missense variant	HIGH	p.Val49fs	1	1	0	-	-	-	-	-	-	-	-	-	-	-	-	-	-	-	-	-	-	-	-	-	-	-	-	-	-	-	-	-	-	-	-	-	-	-	-	-	-	-	-
MRSN4605_05300	ftsI	NP_253108.2	penicillin-binding protein 3	missense variant	MODERATE	p.Cys504Arg	88	80	8	-	-	-	-	-	-	-	-	-	-	-	+	+	-	-	+	+	+	+	+	+	+	+	+	+	+	+	+	+	-	-	+	-	-	-	-	+	+	+	+
MRSN4605_05300	ftsI	NP_253108.1	penicillin-binding protein 3	missense variant	MODERATE	p.Asn427Ser	2	2	0	-	-	-	-	-	-	-	-	-	-	-	-	-	-	-	-	+	+	-	-	-	-	-	-	-	-	-	-	-	-	-	-	-	-	-	-	-	-	-	-
MRSN4605_05300	ftsI	NP_253108.1	penicillin-binding protein 3	missense variant	MODERATE	p.Thr267Ala	2	2	0	-	-	-	-	-	-	-	-	-	-	-	-	-	-	-	-	-	-	-	-	-	-	-	-	-	-	-	-	-	-	-	-	-	-	-	-	-	-	-	-
MRSN4605_05300	ftsI	NP_253108.1	penicillin-binding protein 3	missense variant	MODERATE	p.Phe533Leu	1	0	1	-	-	-	-	-	-	-	-	-	-	-	-	-	-	-	-	-	-	-	-	-	-	-	-	-	-	-	-	-	-	-	-	-	-	-	-	-	-	-	-
MRSN4605_05406	ampD	NP_253212.1	beta-lactamase expression regulator AmpD	stop gained	HIGH	p.Trp97*	51	0	51	-	-	-	-	-	-	-	-	-	-	-	-	-	-	-	-	-	-	-	-	-	-	-	-	-	-	-	-	-	-	-	-	-	-	-	-	-	-	-	-
MRSN4605_05406	ampD	NP_253212.1	beta-lactamase expression regulator AmpD	missense variant	MODERATE	p.Thr139Lys	8	8	0	-	-	-	-	-	-	-	-	-	-	-	-	-	-	-	-	-	-	-	-	-	-	-	-	-	-	-	-	-	+	+	-	-	+	+	+	-	-	-	-
MRSN4605_05406	ampD	NP_253212.1	beta-lactamase expression regulator AmpD	missense variant	MODERATE	p.His98Tyr	5	5	0	-	-	-	-	-	-	-	-	-	-	-	-	-	-	-	-	-	-	-	-	-	-	-	-	-	-	-	-	-	-	-	-	-	-	-	-	-	-	-	-
MRSN4605_05406	ampD	NP_253212.1	beta-lactamase expression regulator AmpD	missense variant	MODERATE	p.His2Tyr	2	2	0	-	-	-	-	-	-	-	-	-	-	-	-	-	-	-	-	-	-	-	+	-	-	-	-	-	+	-	-	-	-	-	-	-	-	-	-	-	-	-	-
MRSN4605_05406	ampD	NP_253212.1	beta-lactamase expression regulator AmpD	initiator codon variant	LOW	p.Met1?	1	0	1	-	-	-	-	-	-	-	-	-	-	-	-	-	-	-	-	-	-	-	-	-	-	-	-	-	-	-	-	-	-	-	-	-	-	-	-	-	-	-	-
MRSN4605_05406	ampD	NP_253212.1	beta-lactamase expression regulator AmpD	disruptive inframe deletion	MODERATE	p.Arg24_Asp28delinsHis	1	0	1	-	-	-	-	-	-	-	-	-	-	-	-	-	-	-	-	-	-	-	-	-	-	-	-	-	-	-	-	-	-	-	-	-	-	-	-	-	-	-	-
MRSN4605_05590	oprJ	NP_253287.1	Multidrug efflux outer membrane protein OprJ precursor	missense variant	MODERATE	p.Ser9Thr	10	0	10	-	-	-	-	-	-	-	-	-	-	-	-	-	-	-	-	-	-	-	-	-	-	-	-	-	-	-	-	-	-	-	-	-	-	-	-	-	-	-	-
MRSN4605_05592	mexC	NP_253289.1	Resistance-Nodulation-Cell Division (RND) multidrug efflux membrane fusion protein MexC precursor	stop gained	HIGH	p.Glu74*	1	1	0	-	-	-	-	-	-	-	-	-	-	-	-	-	-	-	-	-	-	-	-	-	-	-	-	-	-	-	-	-	-	-	-	-	-	-	-	-	-	-	-
MRSN4605_05592	mexC	NP_253289.1	Resistance-Nodulation-Cell Division (RND) multidrug efflux membrane fusion protein MexC precursor	frameshift variant	HIGH	p.Arg36fs	1	1	0	-	-	-	-	-	-	-	-	-	-	-	-	-	-	-	-	-	-	-	-	-	-	-	-	-	-	-	-	-	-	-	-	-	-	-	-	-	-	-	-
MRSN4605_05593	nfxB	NP_253290.1	transcriptional regulator NfxB	missense variant	MODERATE	p.Arg163Gln	1	1	0	-	-	-	-	-	-	-	-	-	-	-	-	-	-	-	-	-	-	-	-	-	-	-	-	-	-	-	-	-	-	-	-	-	-	-	-	-	-	-	-
MRSN4605_05780	speD2	NP_253461.1	SpeD2	missense variant	MODERATE	p.Val159Glu	1	0	1	-	-	-	-	-	-	-	-	-	-	-	-	-	-	-	-	-	-	-	-	-	-	-	-	-	-	-	-	-	-	-	-	-	-	-	-	-	-	-	-
MRSN4605_05783	pmrA	NP_253464.1	PmrA: two-component regulator system response regulator PmrA	missense variant	MODERATE	p.Asp92Ala	1	0	1	-	-	-	-	-	-	-	-	-	-	-	-	-	-	-	-	-	-	-	-	-	-	-	-	-	-	-	-	-	-	-	-	-	-	-	-	-	-	-	-
MRSN4605_05784	pmrB	NP_253465.1	PmrB: two-component regulator system signal sensor kinase PmrB	missense variant	MODERATE	p.Ala54Val	2	2	0	-	-	-	-	-	-	-	-	-	-	-	-	-	-	-	-	-	-	-	-	-	-	-	-	-	-	-	-	-	-	-	-	-	-	-	-	-	-	-	-
MRSN4605_05959	hfq	NP_253631.1	Hfq	missense variant	MODERATE	p.Val62Met	1	0	1	-	-	-	-	-	-	-	-	-	-	-	-	-	-	-	-	-	-	-	-	-	-	-	-	-	-	-	-	-	-	-	-	-	-	-	-	-	-	-	-
MRSN4605_05959	hfq	NP_253631.1	Hfq	missense variant	MODERATE	p.Asn48Ser	1	1	0	-	+	-	-	-	-	-	-	-	-	-	-	-	-	-	-	-	-	-	-	-	-	-	-	-	-	-	-	-	-	-	-	-	-	-	-	-	-	-	-
MRSN4605_05979	parC	NP_253651.1	topoisomerase IV subunit A	missense variant	MODERATE	p.Pro119Ser	7	7	0	-	-	-	-	-	-	-	-	-	-	-	-	-	-	-	-	-	-	-	-	-	-	-	-	-	-	-	-	-	-	-	-	-	-	-	-	-	-	-	-
MRSN4605_05979	parC	NP_253651.1	topoisomerase IV subunit A	missense variant	MODERATE	p.Glu91Lys	1	0	1	-	-	-	-	-	-	-	-	-	-	-	-	-	-	-	-	-	-	-	-	-	-	-	-	-	-	-	-	-	-	-	-	-	-	-	-	-	-	-	-
MRSN4605_06370	crc	NP_254019.1	catabolite repression control protein	missense variant	MODERATE	p.Ile11Leu	6	6	0	-	-	-	-	-	-	-	-	-	+	+	-	-	-	-	-	-	-	-	-	-	-	-	-	-	-	-	-	-	-	-	-	+	-	-	-	-	-	-	-
MRSN4605_06370	crc	NP_254019.1	catabolite repression control protein	frameshift variant&stop gained	HIGH	p.Tyr132fs	1	1	0	-	-	-	-	-	-	-	-	-	-	-	-	-	-	-	-	-	-	-	-	-	-	-	-	-	-	-	+	-	-	-	-	-	-	-	-	-	-	-	-
MRSN4605_06370	crc	NP_254019.1	catabolite repression control protein	frameshift variant	HIGH	p.Gln240fs	1	0	1	-	-	-	-	-	-	-	-	-	-	-	-	-	-	-	-	-	-	-	-	-	-	-	-	-	-	-	-	-	-	-	-	-	-	-	-	-	-	-	-
MRSN4605_06370	crc	NP_254019.1	catabolite repression control protein	missense variant	MODERATE	p.Gly147Asp	1	1	0	-	-	-	-	-	-	-	-	-	-	-	-	-	-	-	-	-	-	-	-	-	-	-	-	-	-	-	-	-	-	-	-	-	-	-	-	-	-	-	-
MRSN4605_06370	crc	NP_254019.1	catabolite repression control protein	missense variant	MODERATE	p.Glu174Val	1	1	0	-	-	-	-	-	-	-	-	-	-	-	-	-	-	+	-	-	-	-	-	-	-	-	-	-	-	-	-	-	-	-	-	-	-	-	-	-	-	-	-
MRSN4605_06517	armZ	NP_254158.1	ArmZ	missense variant	MODERATE	p.Cys305Arg	1	1	0	-	-	-	-	-	-	-	-	-	-	-	-	-	-	-	-	-	-	-	-	-	-	-	-	-	-	-	-	-	-	-	-	-	-	-	-	-	-	-	-
[truncated: 213 more columns]
